# Supplementary material for: PHOSPHATE STARVATION RESPONSE transcription factors enable arbuscular mycorrhiza symbiosis
Source: PubMed Central journal article supplement (PMC8789775; doi:10.1038/s41467-022-27976-8), 2022-01-25
Supplement: 41467_2022_27976_MOESM1_ESM.pdf [file 41467_2022_27976_MOESM1_ESM.pdf]

**PHOSPHATE STARVATION RESPONSE transcription factors  
enable arbuscular mycorrhiza symbiosis**

*Das et al.*

This PDF file includes:  
Supplementary Figures 1 to 25  
Supplementary Tables 1 to 5  
Supplementary References

Other Supplementary Materials for this manuscript include the following:  
Supplementary Data 1 to 10

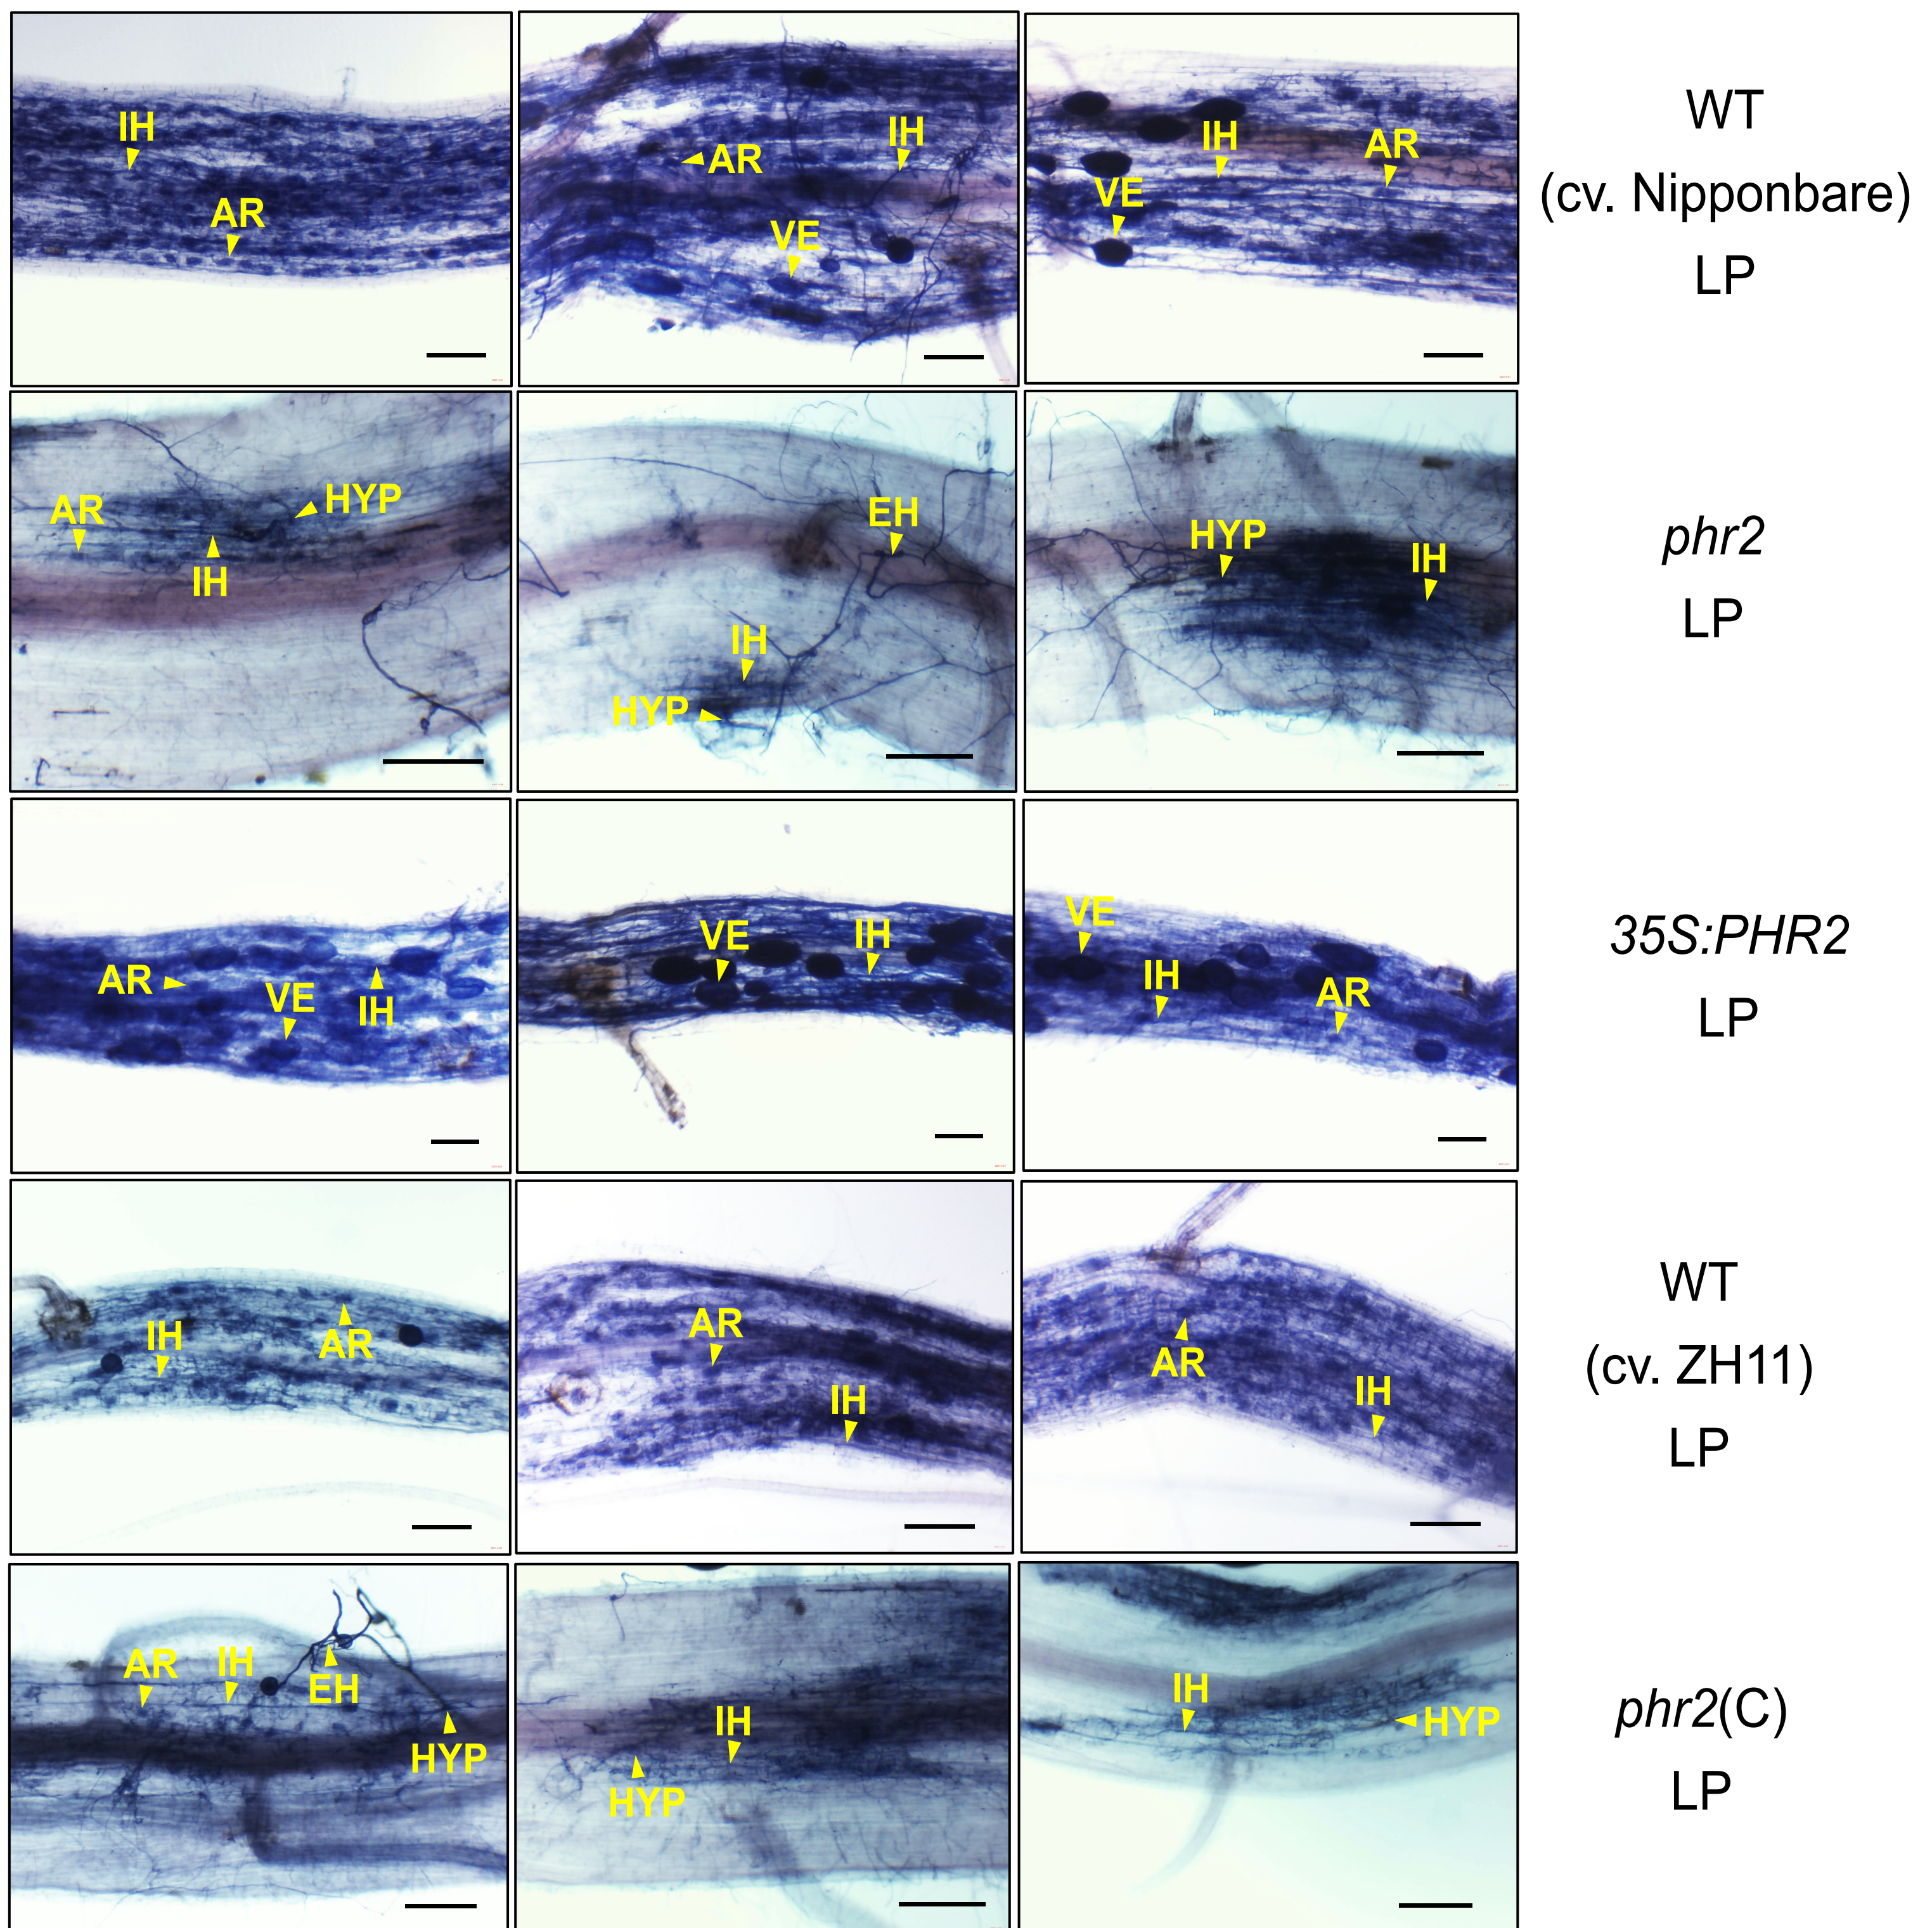

**Supplementary Figure 1. Colonization of WT, *phr2* and *35S:PHR2*.** Brightfield images of roots stained with acid-ink to visualize colonization of wild type (cv. Nipponbare), *phr2* and *35S:PHR2* and wild-type (cv. ZH11) and *phr2(C)* roots by *Rhizophagus irregularis* at 7 wpi when grown at LP (25  $\mu$ M P<sub>i</sub>) in quartz sand. Scale bars, 200  $\mu$ m. Abbreviations: EH, extraradical hypha; HYP: hyphopodium; IH, intraradical hypha; AR, arbuscule, VE, vesicle. The phenotype was observed in 11 (6 + 5) independent plants in two independent experiments.

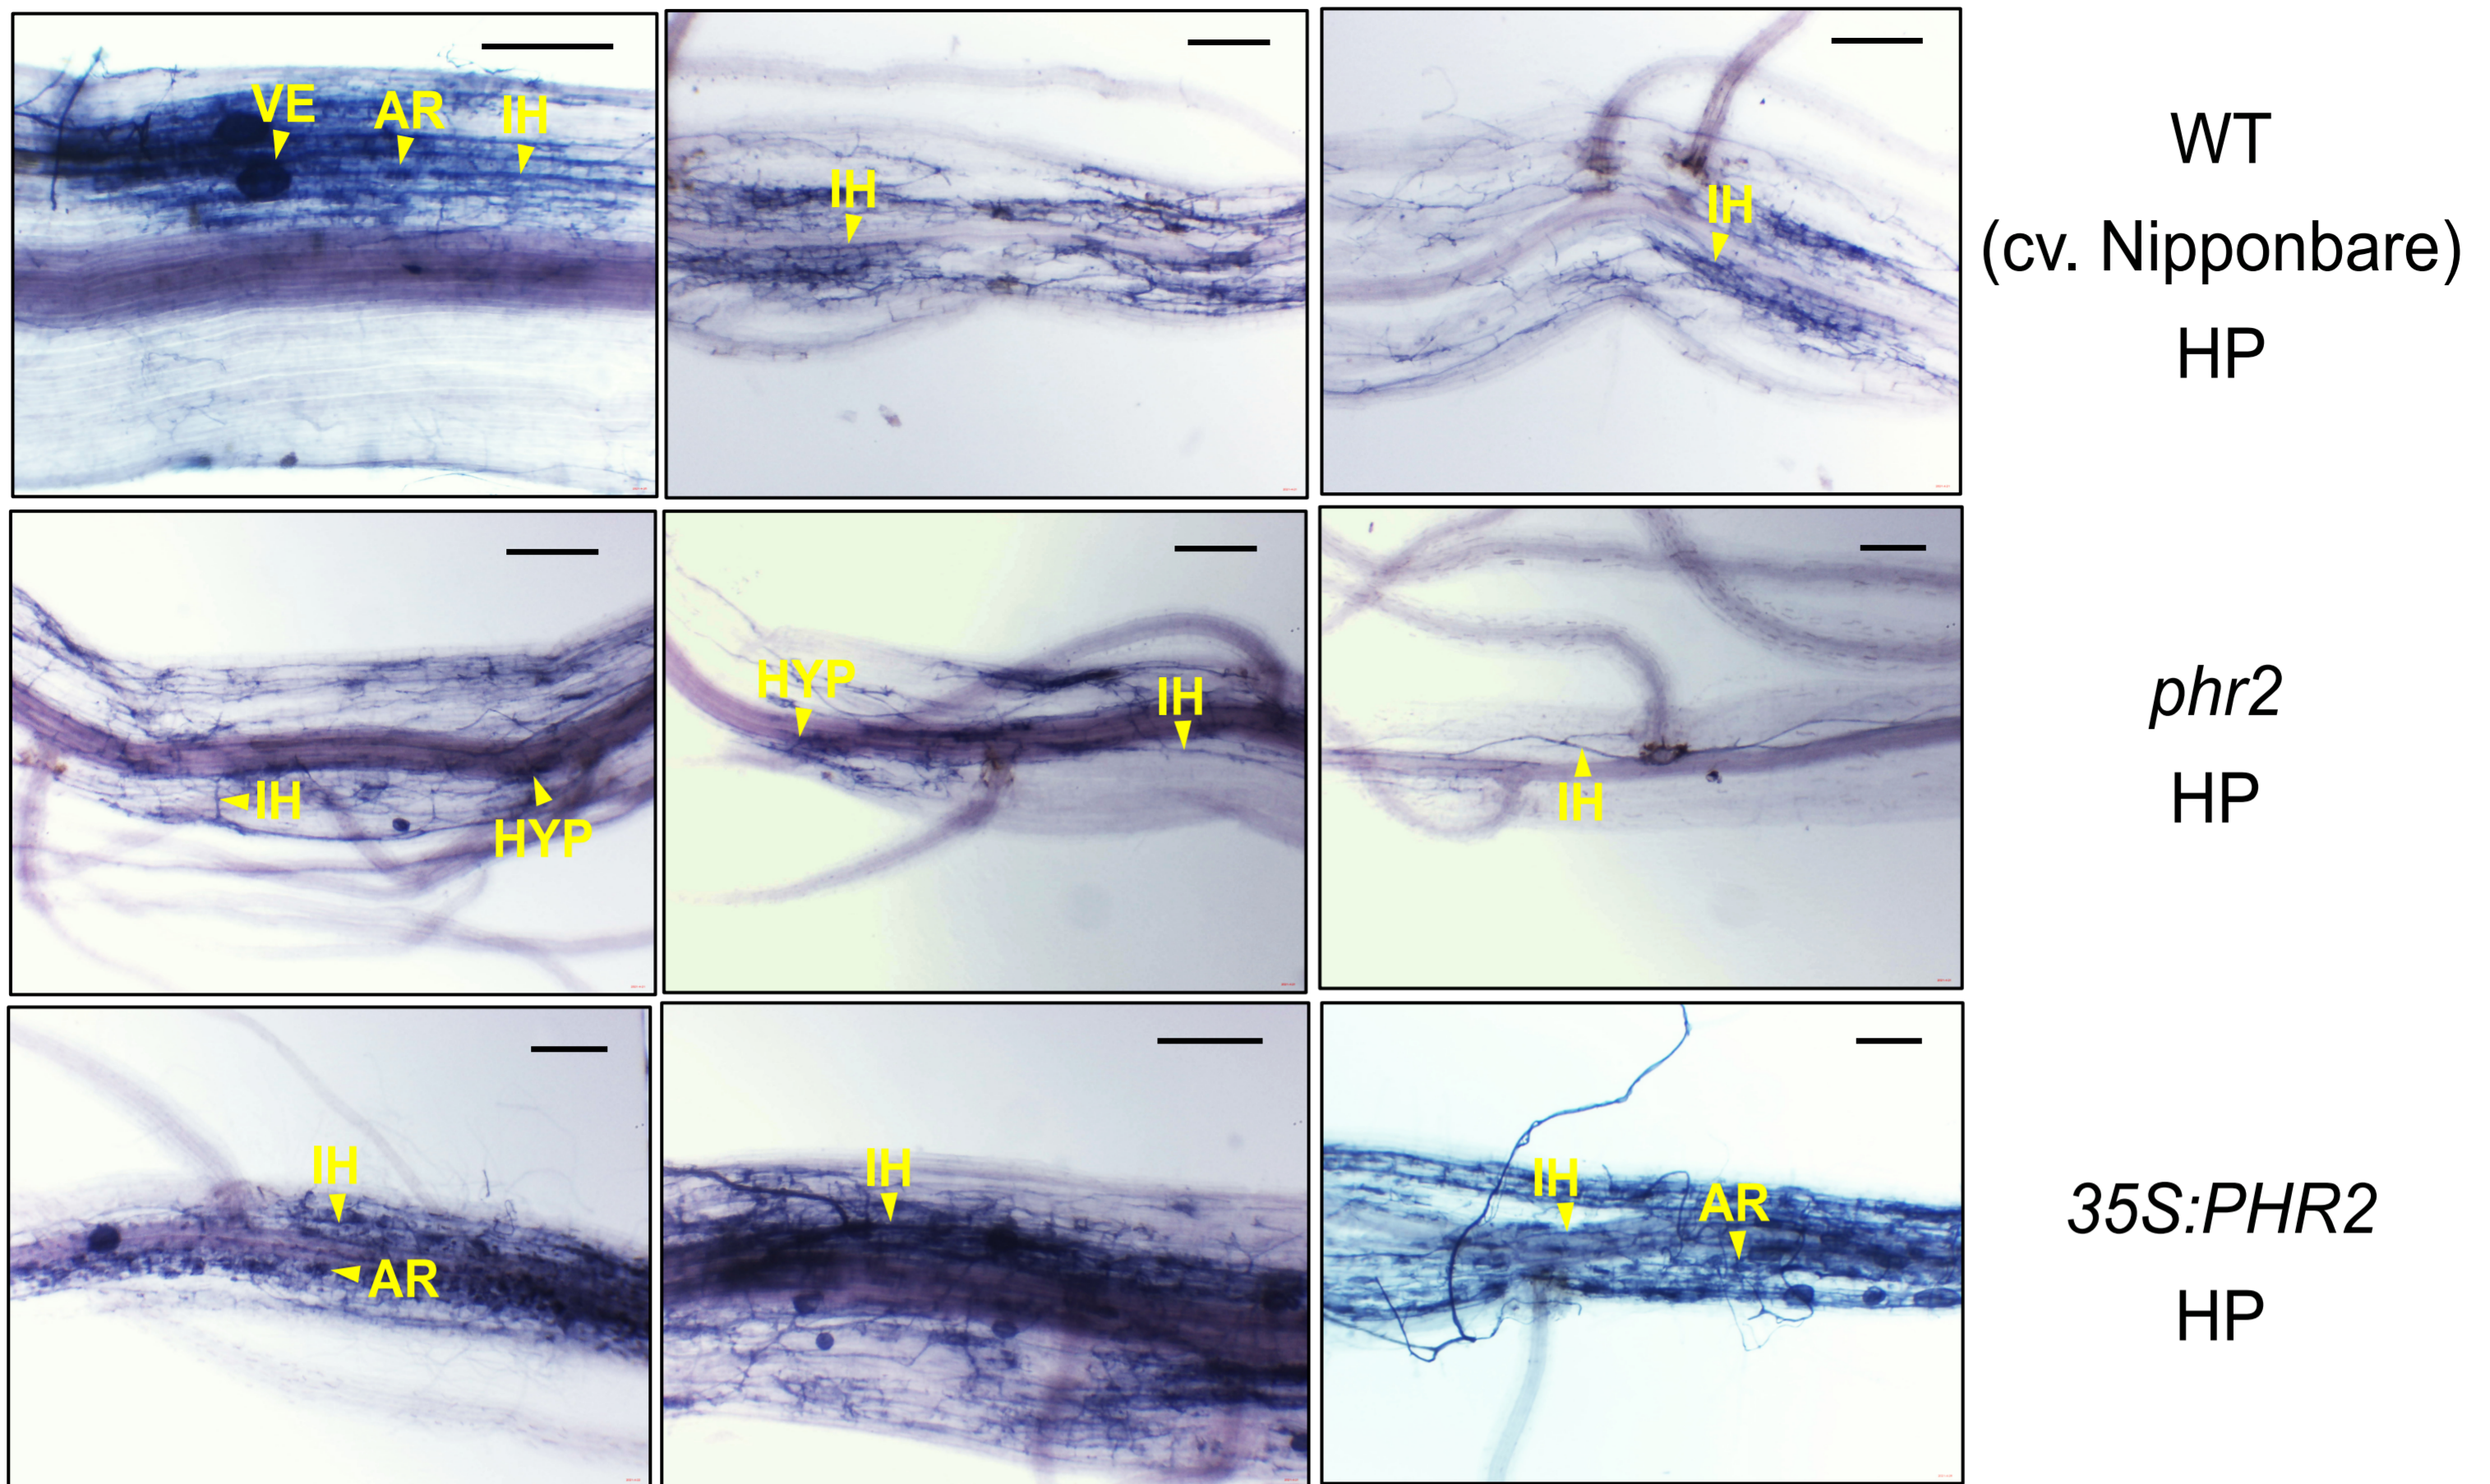

**Supplementary Figure 2. Colonization of WT, *phr2* and 35S:PHR2 at high phosphate.** Brightfield images of roots stained with acid-ink to visualize colonization of wild type (cv. Nipponbare), *phr2* and 35S:PHR2 roots by *Rhizophagus irregularis* at 7 wpi and grown at HP (500  $\mu\text{m P}_i$ ) in quartz sand. Scale bars, 200  $\mu\text{m}$ . Abbreviations: EH, extraradical hypha; HYP: hyphopodium; IH, intraradical hypha; AR, arbuscule, VE, vesicle. The phenotype was observed in 11 (6 + 5) independent plants in two independent experiments.

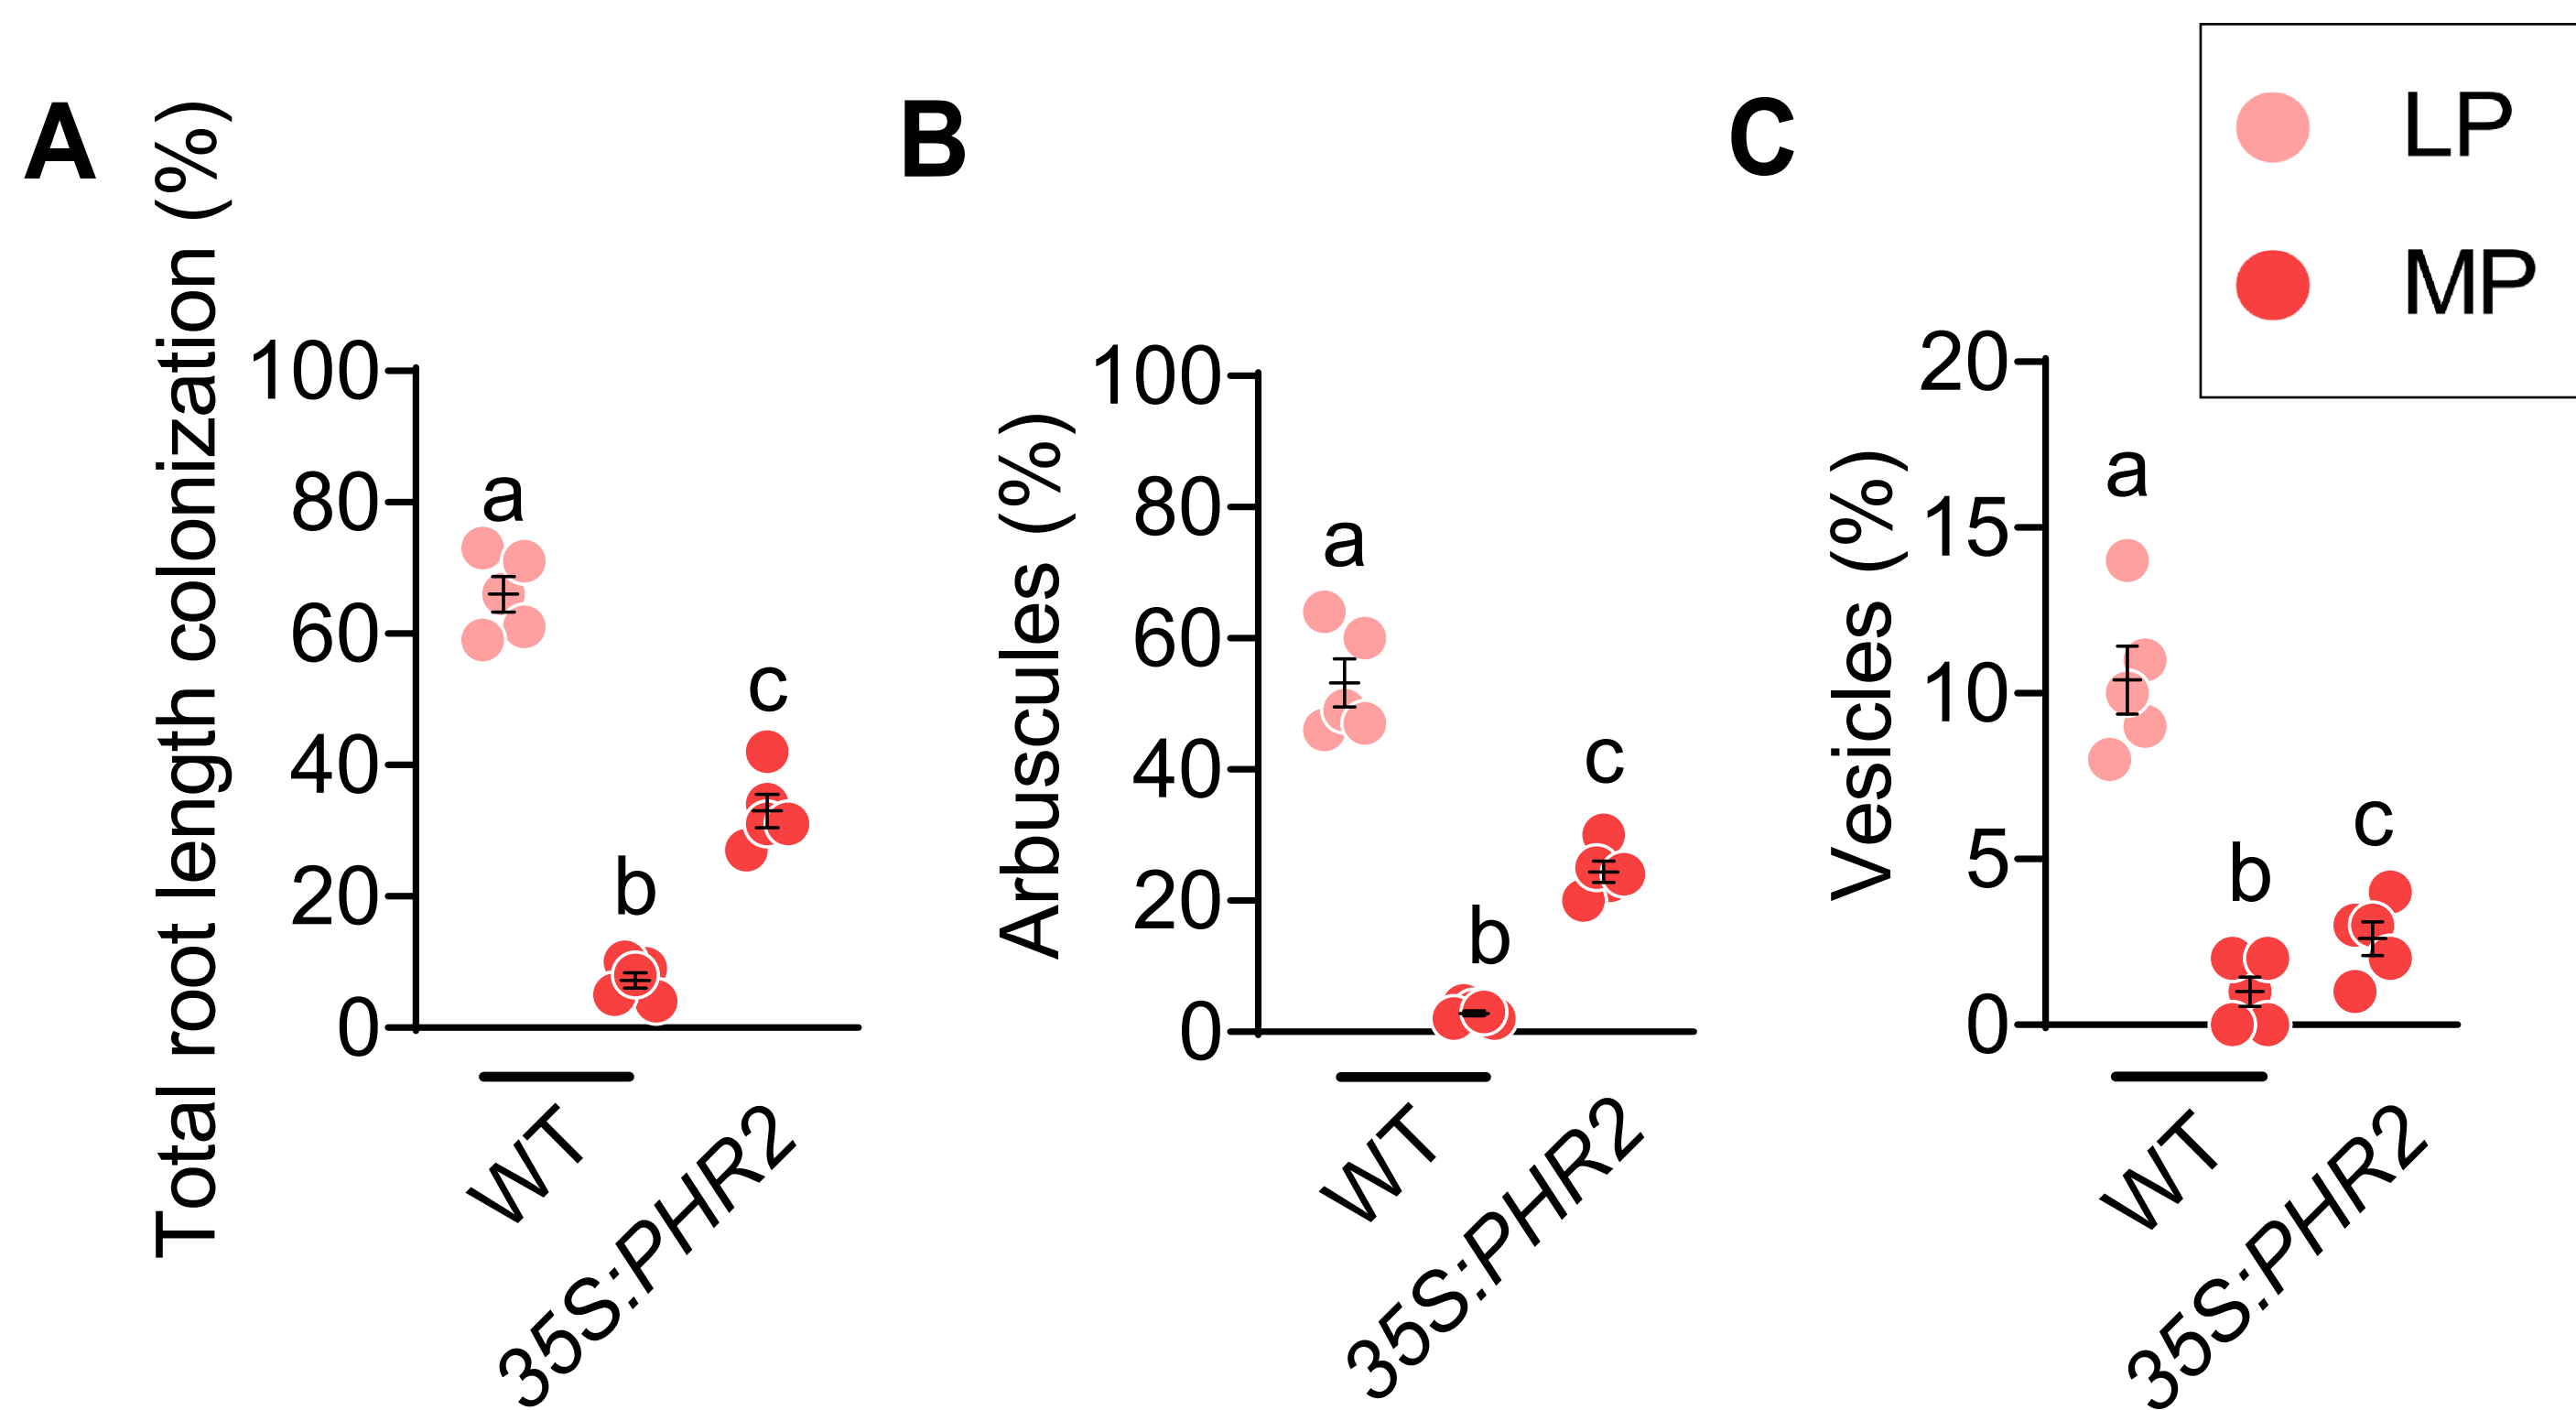

**Supplementary Figure 3. Effect of PHR2 overexpression on root colonization by AM fungi at medium phosphate.** Effect of low (LP, 25  $\mu\text{M P}_i$ ) and medium (MP, 200  $\mu\text{M P}_i$ ) phosphate conditions on total root colonization (**A**), arbuscules (**B**) and vesicles (**C**) at 7 wpi. Statistics: Individual data-points and mean  $\pm$  SE are shown. N=5 independent root systems; Brown-Forsythe and Welch's One-Way ANOVA test with Games-Howell's multiple comparisons test. Different letters indicate statistical differences.

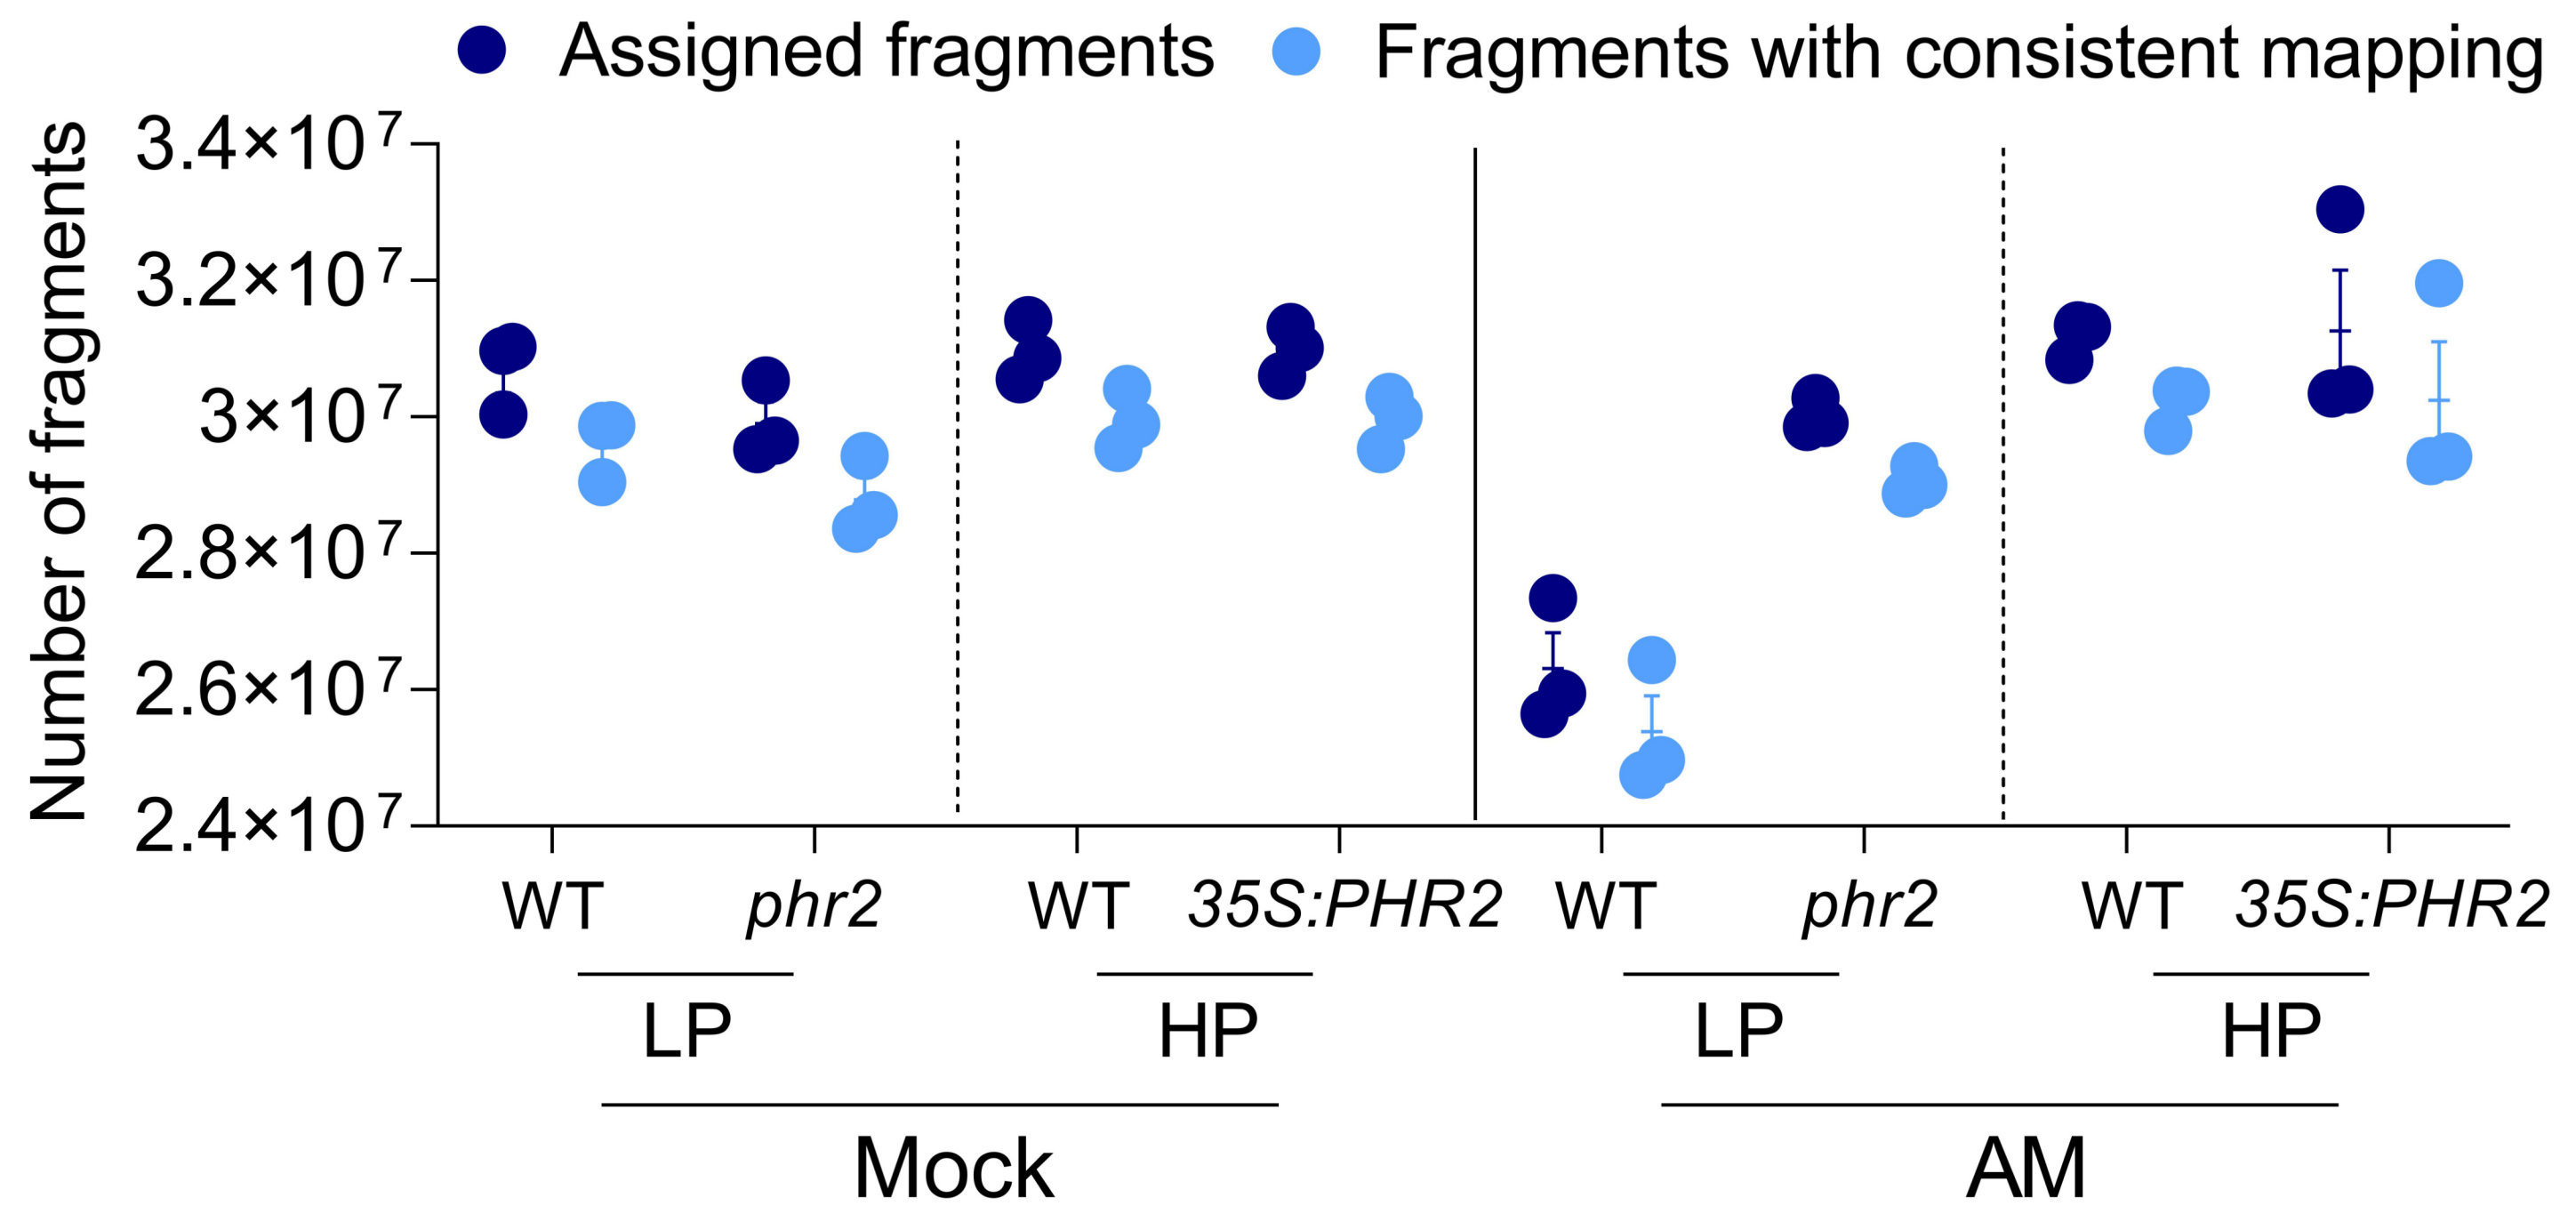

**Supplementary Figure 4. RNA-seq fragment mapping.** Number of assigned fragments in RNA-Seq along with fragments consistently mapped to the transcriptome reference, N=3 independent root systems. Individual data-points and mean  $\pm$  SE are shown. Lower number of fragments in AM-inoculated wild-type roots grown at LP results from the fact that these sample also contain reads from *R. irregularis* ( $\approx 10\%$  of total fragments).

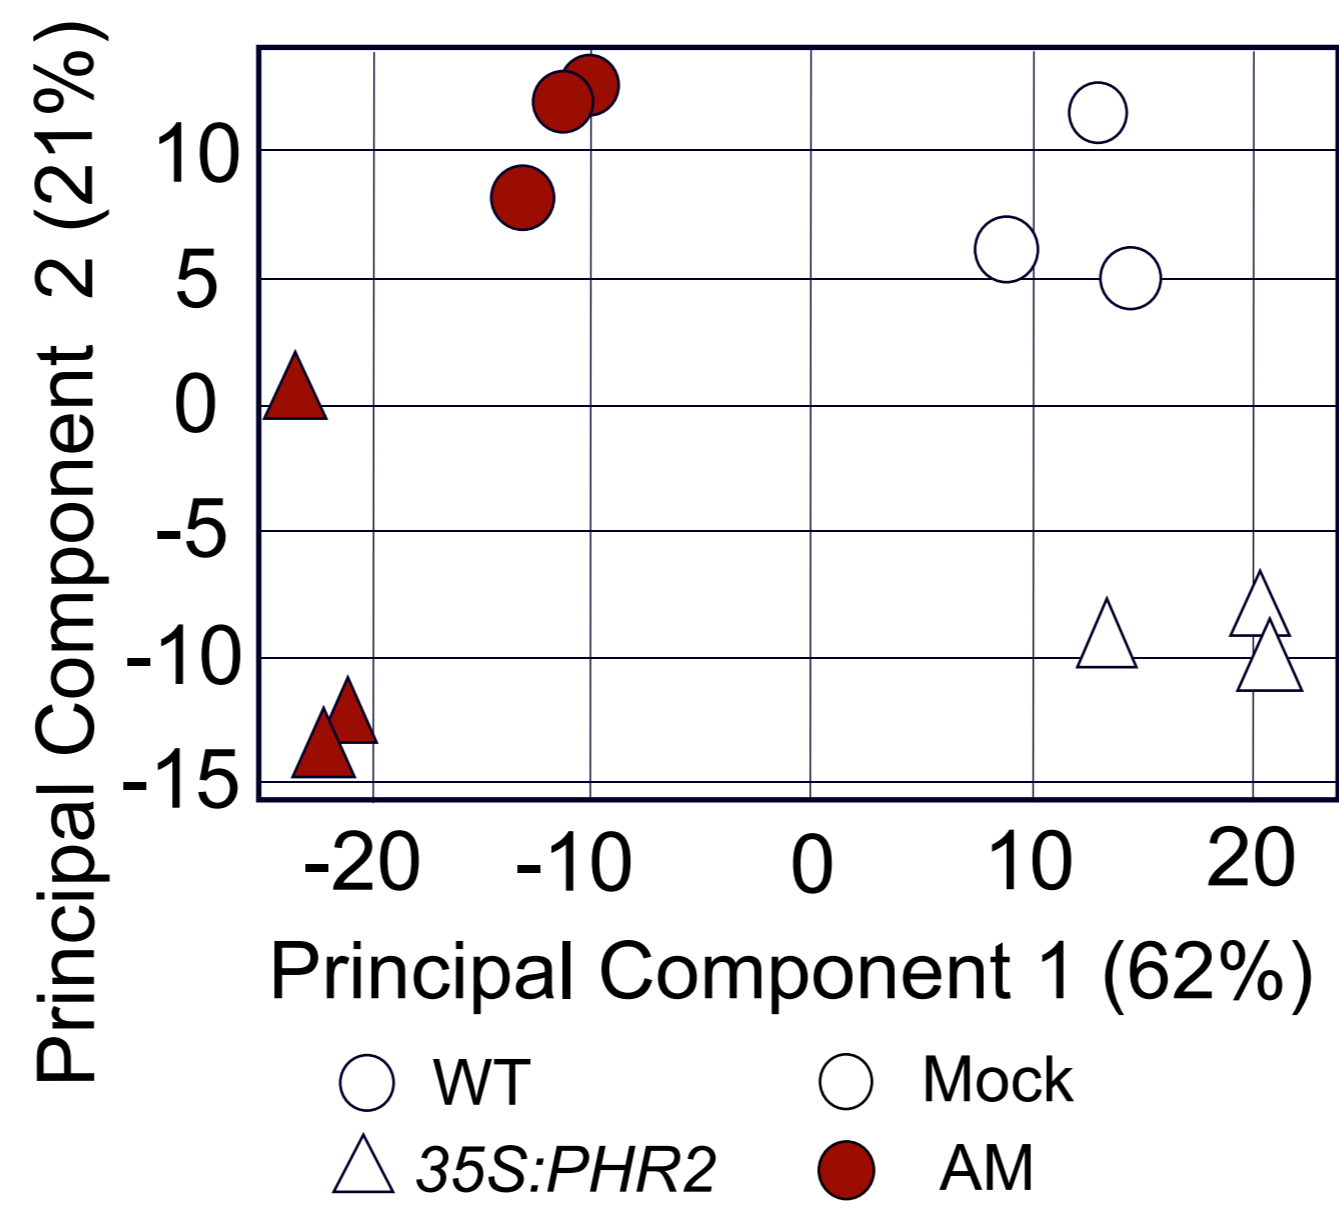

**Supplementary Figure 5. PCA plot for high phosphate samples in RNASeq.**  
 PCA plot for the RNA-Seq based transcriptome of mock and AMF-inoculated wild-type and *35S:PHR2* roots grown at HP conditions.

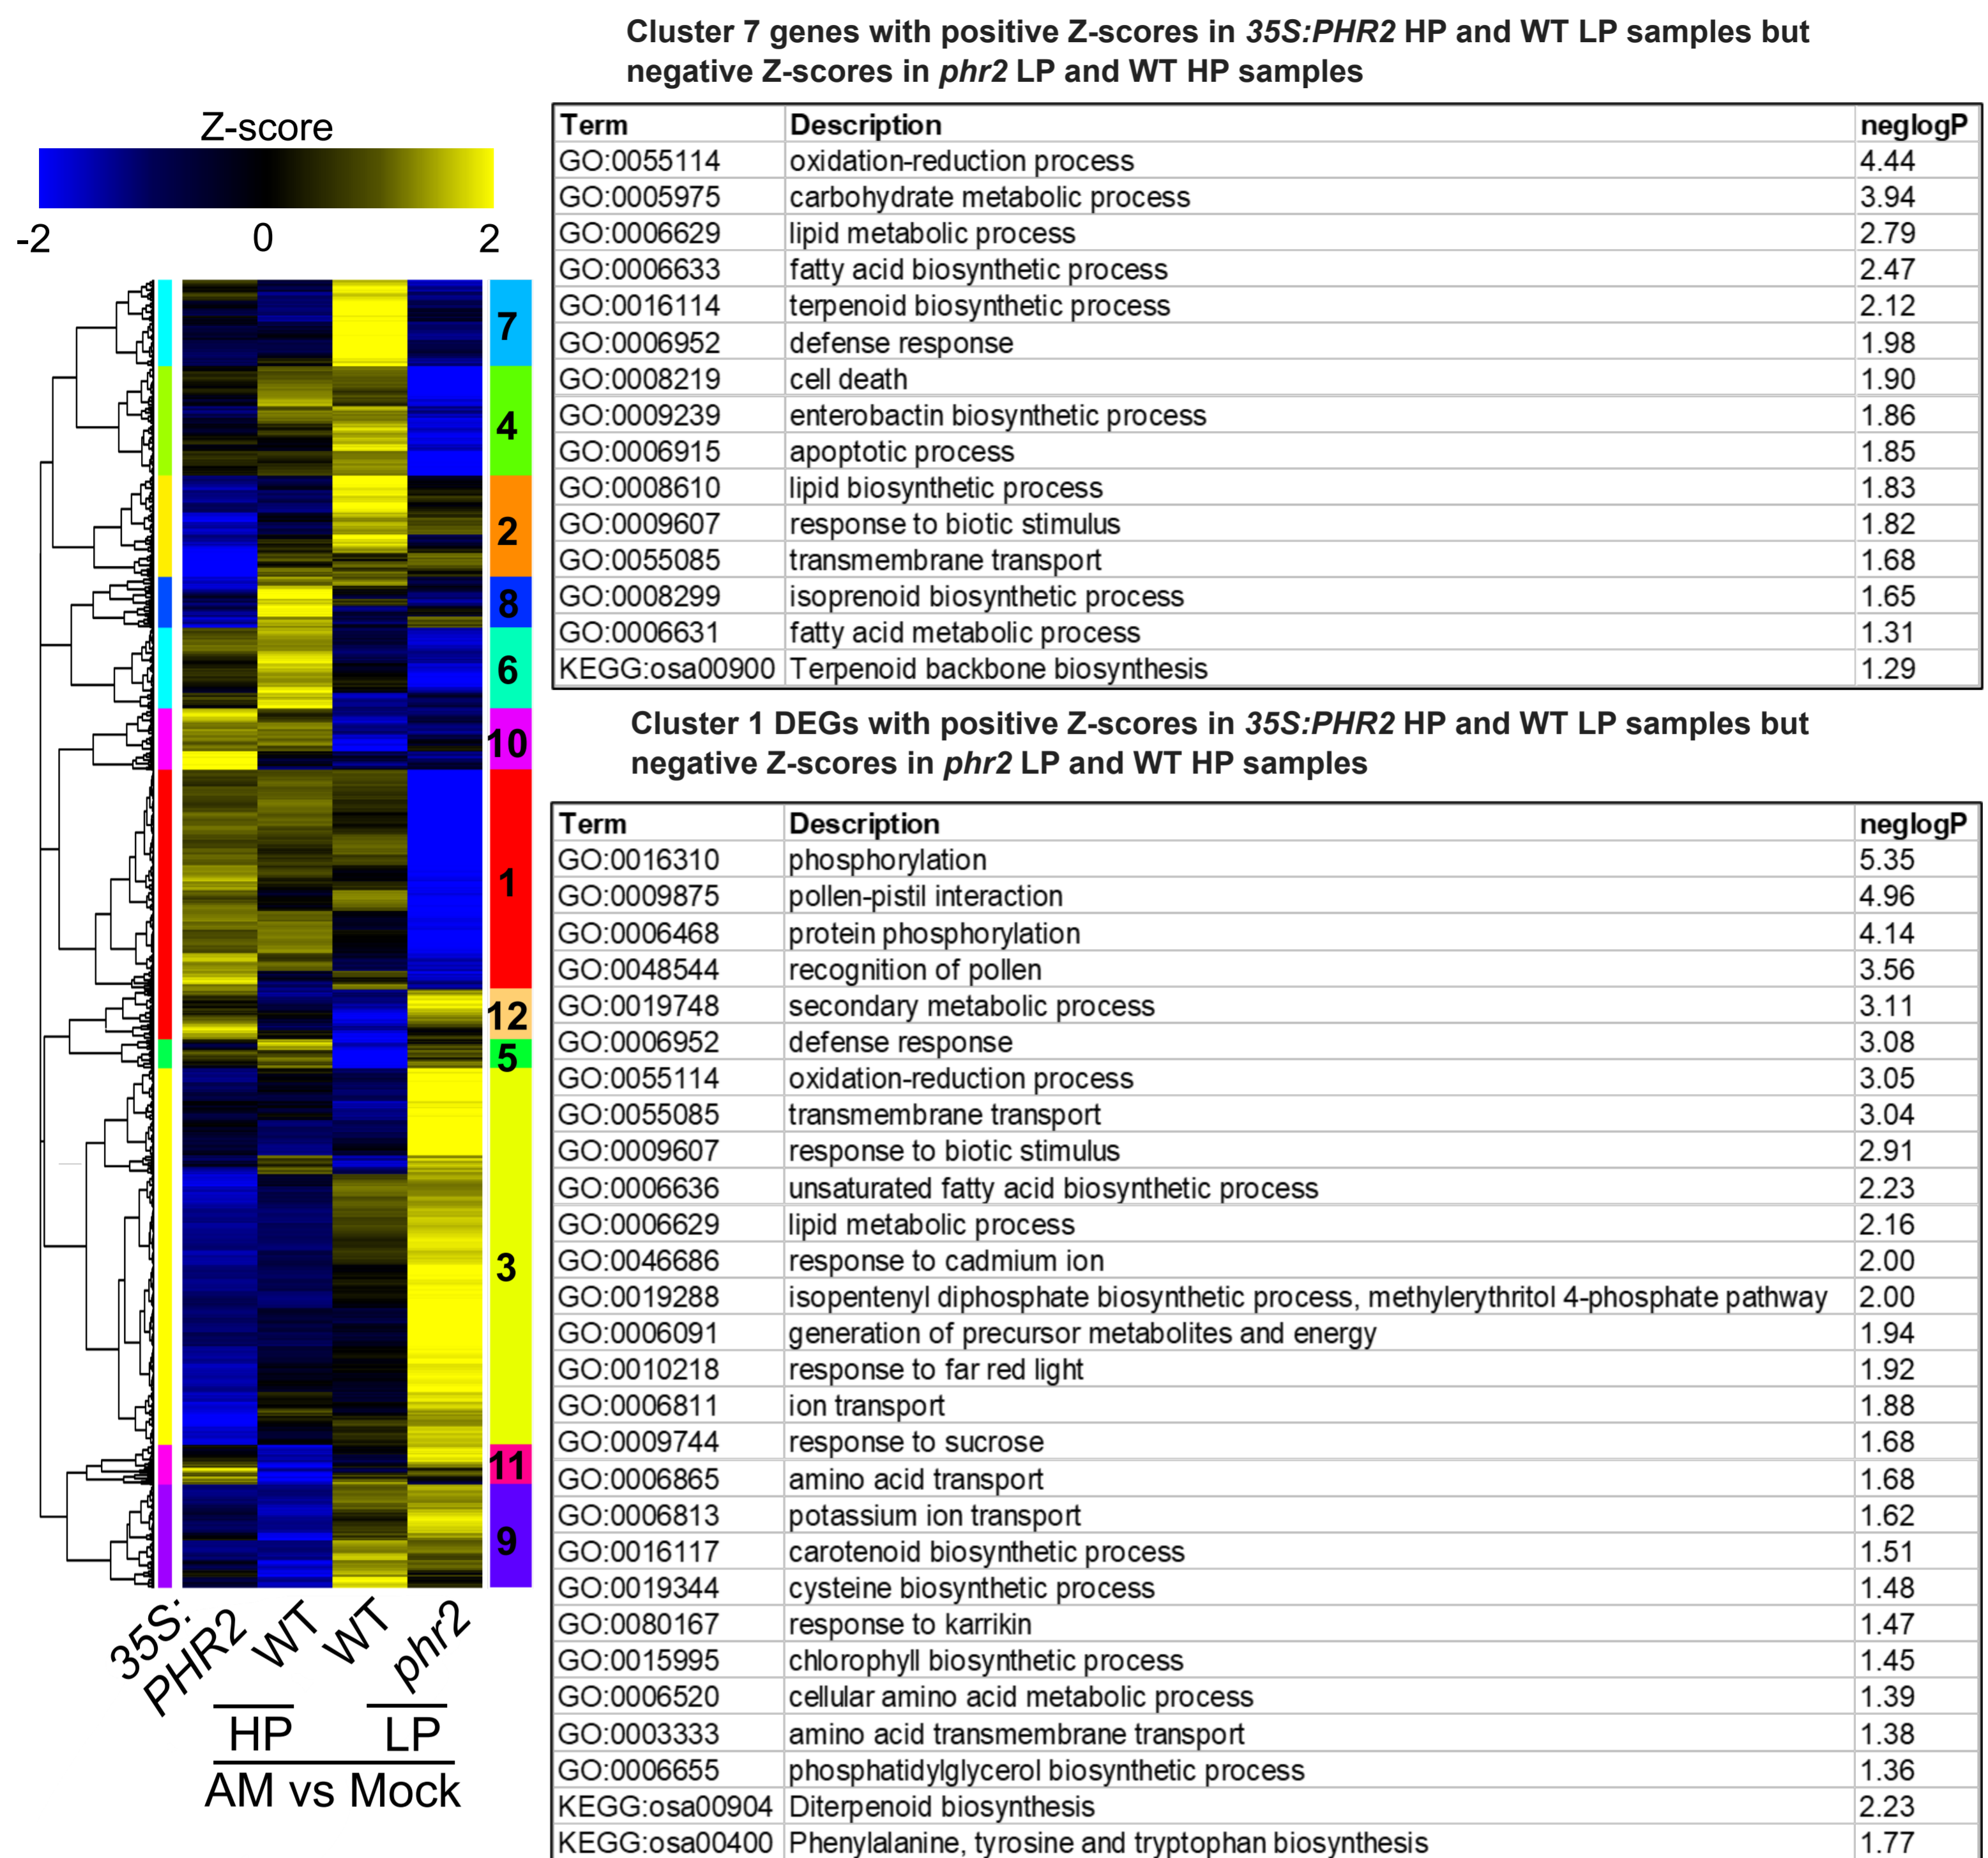

**Supplementary Figure 6. Hierarchical clustering of combined DEGs.** Hierarchical clustering of combined DEGs (AM vs Mock samples,  $\log_2(\text{Fold-change})$ ,  $\text{I}_{fc}$ ) from roots of *phr2* and 35S:PHR2 in LP and HP respectively and wild type at both  $P_i$  conditions. Z-scores represent scaled  $\text{I}_{fc}$ . Colored bars on the left side of heatmap depict individual clusters (based on the dendrogram). Gene ontology (GO) enrichment analysis for selected DEGs in cluster-1 and -7, which showed positive Z-scores for 35S:PHR2 HP and WT LP samples and negative Z-scores for *phr2* LP and WT HP samples. GO term enrichment indicates functional categories important for AM symbiosis such as fatty acid, lipid and carotenoid metabolism, response to biotic stimulus and response to karrikin.

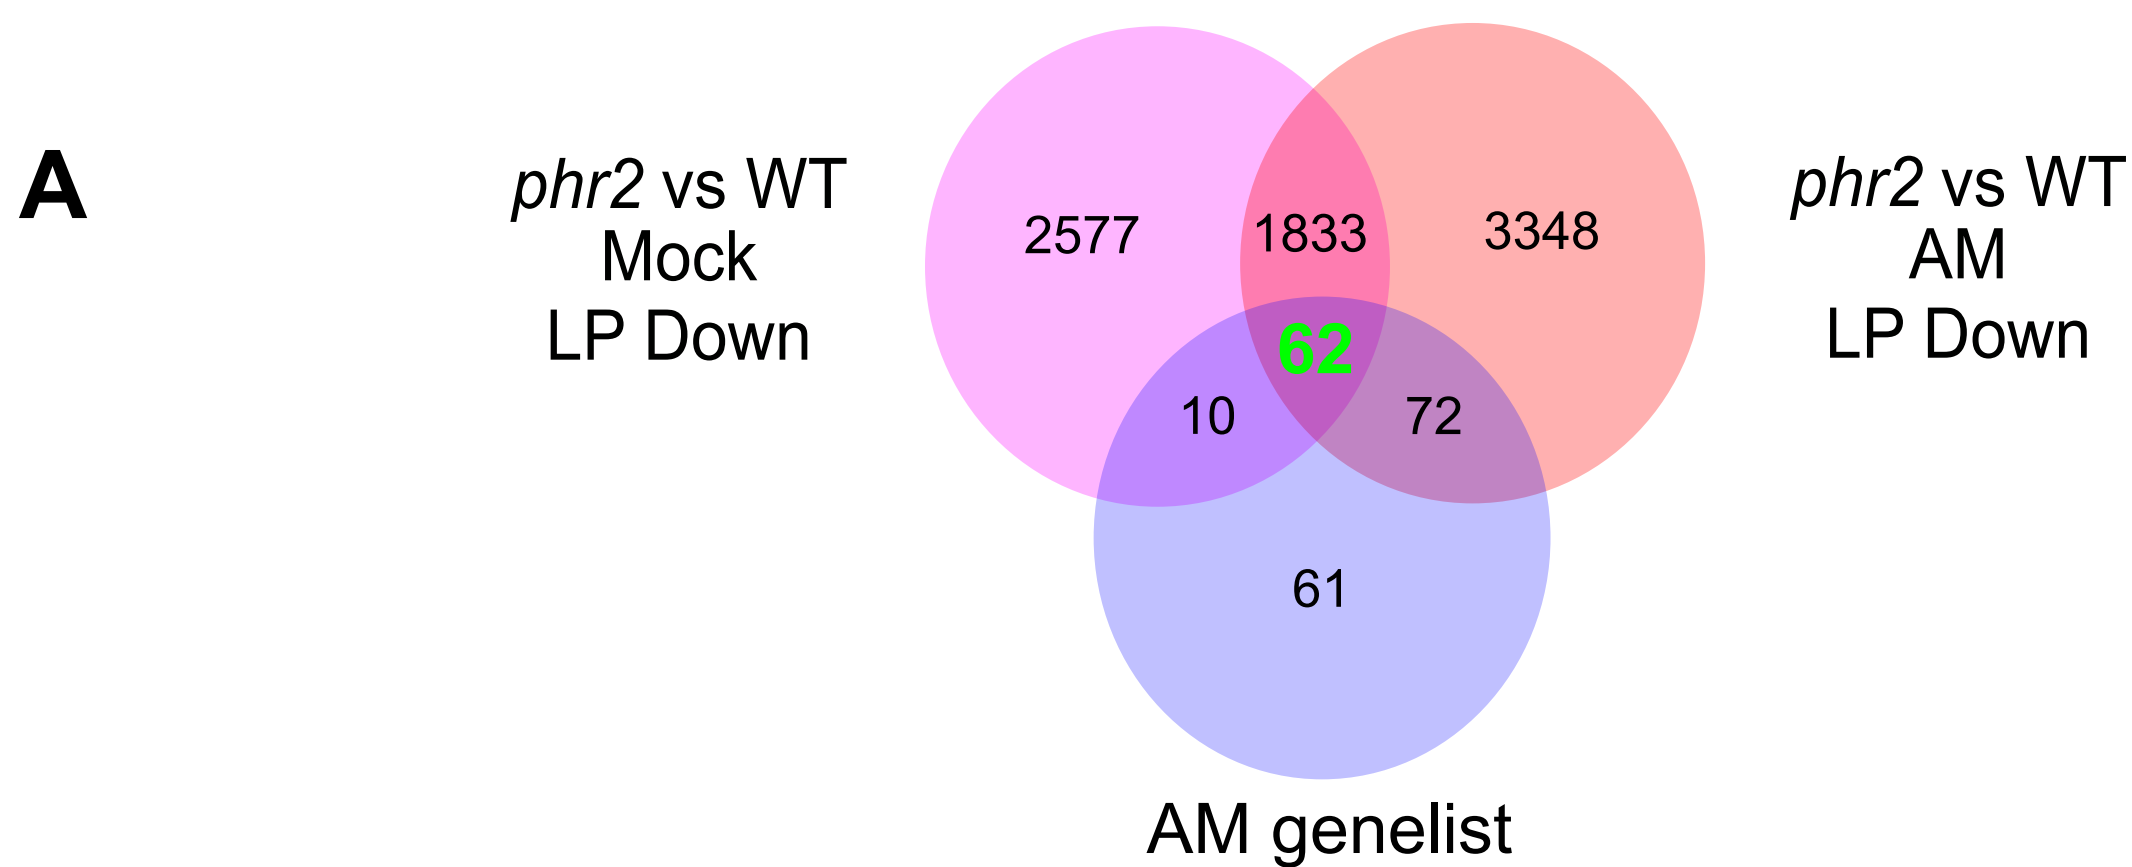

**B**

| Locus ID (62 Genes) | Gene description                                                        |
|---------------------|-------------------------------------------------------------------------|
| LOC_Os01g65000      | AMT3;1, ammonium transporter protein                                    |
| LOC_Os03g45290      | Ankyrin repeat domain-containing protein (Medtr6g027840 VAPYRIN)        |
| LOC_Os01g54270      | D10, CCD8B                                                              |
| LOC_Os01g38580      | D10-like, CCD8A                                                         |
| LOC_Os04g46470      | D17, CCD7, carotenoid cleavage dioxygenase 7                            |
| LOC_Os11g01050      | EXO70 exocyst complex subunit domain containing protein                 |
| LOC_Os03g29480      | NSP1, GRAS transcription factor, nodulation-signaling pathway 1 protein |
| LOC_Os03g15680      | NSP2, nodulation-signaling pathway 2 protein                            |
| LOC_Os05g41090      | OsDMI3, OsCCaMK, calcium/calmodulin dependent protein kinases           |
| LOC_Os06g02520      | OsIPD3, OsCYCLOPS, interacting protein of DMI3                          |
| LOC_Os03g13080      | OsLysM-RLK2, OsLYK5, MYR1/LYK2/RLK2/NFR5                                |
| LOC_Os06g44430      | Protein kinase (Medtr4g129010 KIN2)                                     |
| LOC_Os01g46860      | PT11, inorganic phosphate transporter                                   |
| LOC_Os04g10800      | PT13, inorganic phosphate transporter                                   |
| LOC_Os09g23640      | STR1, ABC-2 type transporter domain containing protein                  |
| LOC_Os07g38070      | SYMRK, protein kinase, putative, expressed (Lj2g3v1467920 LjSymRK)      |
| LOC_Os09g15240      | Zaxinone Synthase (ZAS), carotenoid cleavage dioxygenase                |
| LOC_Os08g05690      | ABC transporter, ATP-binding protein, putative                          |
| LOC_Os05g50300      | AMP1, AMP-binding enzyme, putative                                      |
| LOC_Os04g39780      | AMP-binding enzyme family protein                                       |
| LOC_Os01g44950      | AMP-binding enzyme, putative                                            |
| LOC_Os07g38750      | AP2 domain containing protein                                           |
| LOC_Os12g39330      | AP2 domain containing protein                                           |
| LOC_Os02g48820      | BCP, plastocyanin-like domain containing protein, putative, expressed   |
| LOC_Os06g47130      | C2domain containing protein                                             |
| LOC_Os07g23450      | C2H2 zinc finger protein                                                |
| LOC_Os08g28240      | carotenoid cleavage dioxygenase, putative                               |
| LOC_Os04g58680      | CBF1/2, core histone H2A,H2B,H3,H4, putative                            |
| LOC_Os06g20120      | CND41, chloroplast nucleoid DNA binding protein, putative, expressed    |
| LOC_Os09g39530      | Cupin-domain containing protein                                         |
| LOC_Os07g33620      | cytochrome P450 domain containing protein                               |
| LOC_Os01g50520      | cytochrome P450 monooxygenase CYP711A12, putative, expressed            |
| LOC_Os01g50590      | cytochrome P450, putative, expressed                                    |
| LOC_Os05g51240      | D14L2a, Hydrolase, alpha/beta fold family domain containing protein     |
| LOC_Os10g42400      | DNA polymerase III, clamp loader complex, gamma/delta/delta subunit     |
| LOC_Os01g46390      | DUF538 domain containing protein, putative                              |
| LOC_Os05g49790      | DUF538 domain containing protein, putative                              |
| LOC_Os08g42990      | expressed protein                                                       |
| LOC_Os11g29630      | expressed protein                                                       |
| LOC_Os02g18954      | GDSL-like lipase,acylhydrolase, putative                                |
| LOC_Os02g44850      | GDSL-like lipase,acylhydrolase, putative                                |
| LOC_Os04g47390      | GDSL-like lipase,acylhydrolase, putative                                |
| LOC_Os07g19040      | glycosyl hydrolase, putative                                            |
| LOC_Os08g34258      | inhibitor I family protein, putative                                    |
| LOC_Os08g34249      | inhibitor I family protein, putative, expressed                         |
| LOC_Os04g39180      | KIN6, nodulation receptor kinase precursor, putative                    |
| LOC_Os02g20140      | KinD, protein kinase domain containing protein                          |
| LOC_Os01g57400      | lysM domain containing protein, putative                                |
| LOC_Os04g40570      | MDR1, ABC transporter, ATP-binding protein, putative                    |
| LOC_Os05g47500      | MDR-like ABC transporter                                                |
| LOC_Os08g42590      | mtN19, putative, expressed                                              |
| LOC_Os01g52750      | OsSub3 - Putative Subtilisin homologue                                  |
| LOC_Os04g04750      | peroxidase precursor, putative, expressed                               |
| LOC_Os03g57740      | plastocyanin-like domain containing protein, putative                   |
| LOC_Os02g57700      | protein kinase, putative, expressed                                     |
| LOC_Os01g72710      | putative RETICULATA-RELATED protein of unknown function                 |
| LOC_Os09g20970      | receptor kinase, putative                                               |
| LOC_Os03g38600      | secretory carrier-associated membrane protein, putative, expressed      |
| LOC_Os08g29510      | Taurine catabolism dioxygenase TauD/TfdA domain containing protein      |
| LOC_Os10g18510      | UDP-glucuronosyl and UDP-glucosyl transferase domain containing protein |
| LOC_Os05g50680      | WRKY83                                                                  |
| LOC_Os01g53130      | zinc finger, C3HC4 type domain containing protein, expressed            |

**Supplementary Figure 7. Overlap of genes with decreased transcript levels in *phr2* in Mock or AM roots with AM genelist. (A) Venn diagram of DEGs downregulated in *phr2* vs WT Mock and AM roots at LP and AM genelist. (B) Genes common to all the three sets. Genes highlighted in red have been previously genetically shown to be required for AM development or function.**



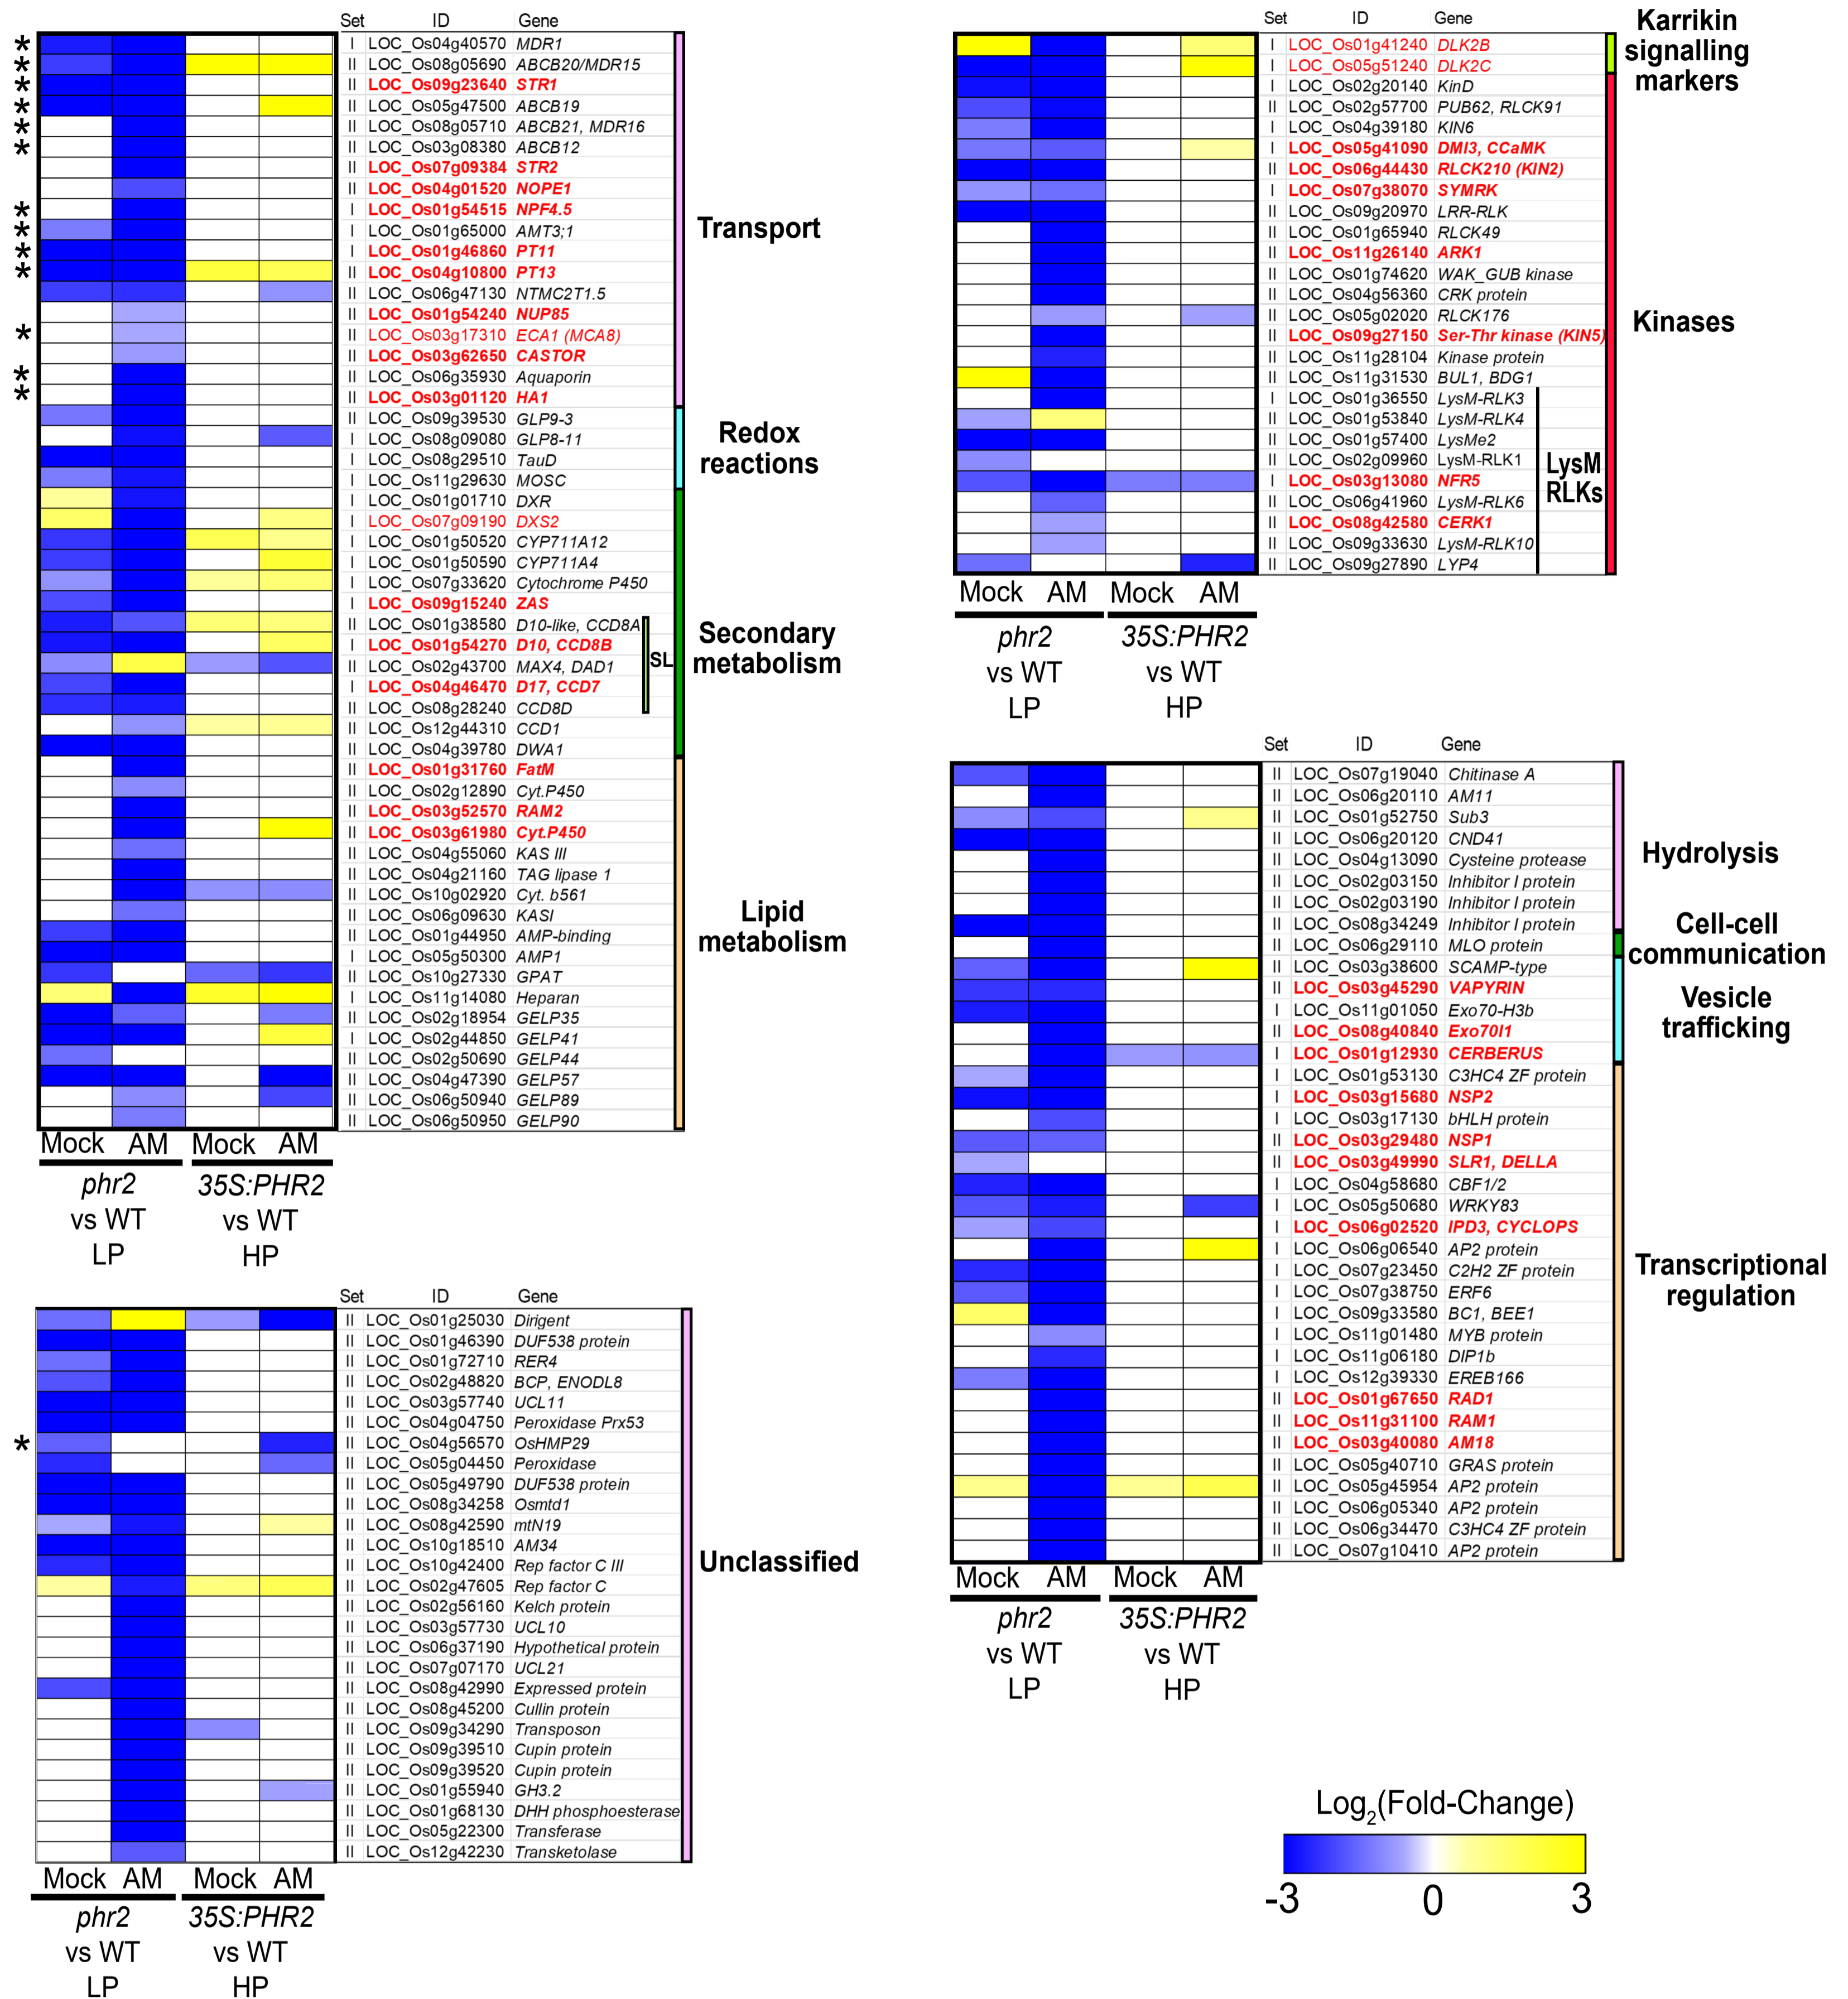

**Supplementary Figure 8. Expression of genes required for or induced during AM depends on PHR2.** Heatmaps for log<sub>2</sub>(Fold-change) of AM genes from set I and II (Figure 2G) for the comparisons *phr2* vs wild type at LP (25 μM) and *35S:PHR2* vs wild type at HP (500 μM). Colored bars on the right indicate functional categories to which the genes belong. Genes with genetically confirmed functions in AM symbiosis are indicated in red (bold for mutants, regular font for *RNAi* lines). 144 out of 205 genes (70%) in the AM genelist had reduced expression in *phr2* vs WT AM and/or Mock LP samples. Asterisks indicate orthologs of *Lotus japonicus* genes involved in transport and associated with P1BS elements in Supplementary Table 2<sup>1</sup>. Out of 48 total genes in this table, only 31 could be retrieved from the *Lotus japonicus* genome assembly build 1.0 (<http://www.kazusa.or.jp/lotus/release1/>) and 14 out of these have reduced expression in rice *phr2* vs WT).

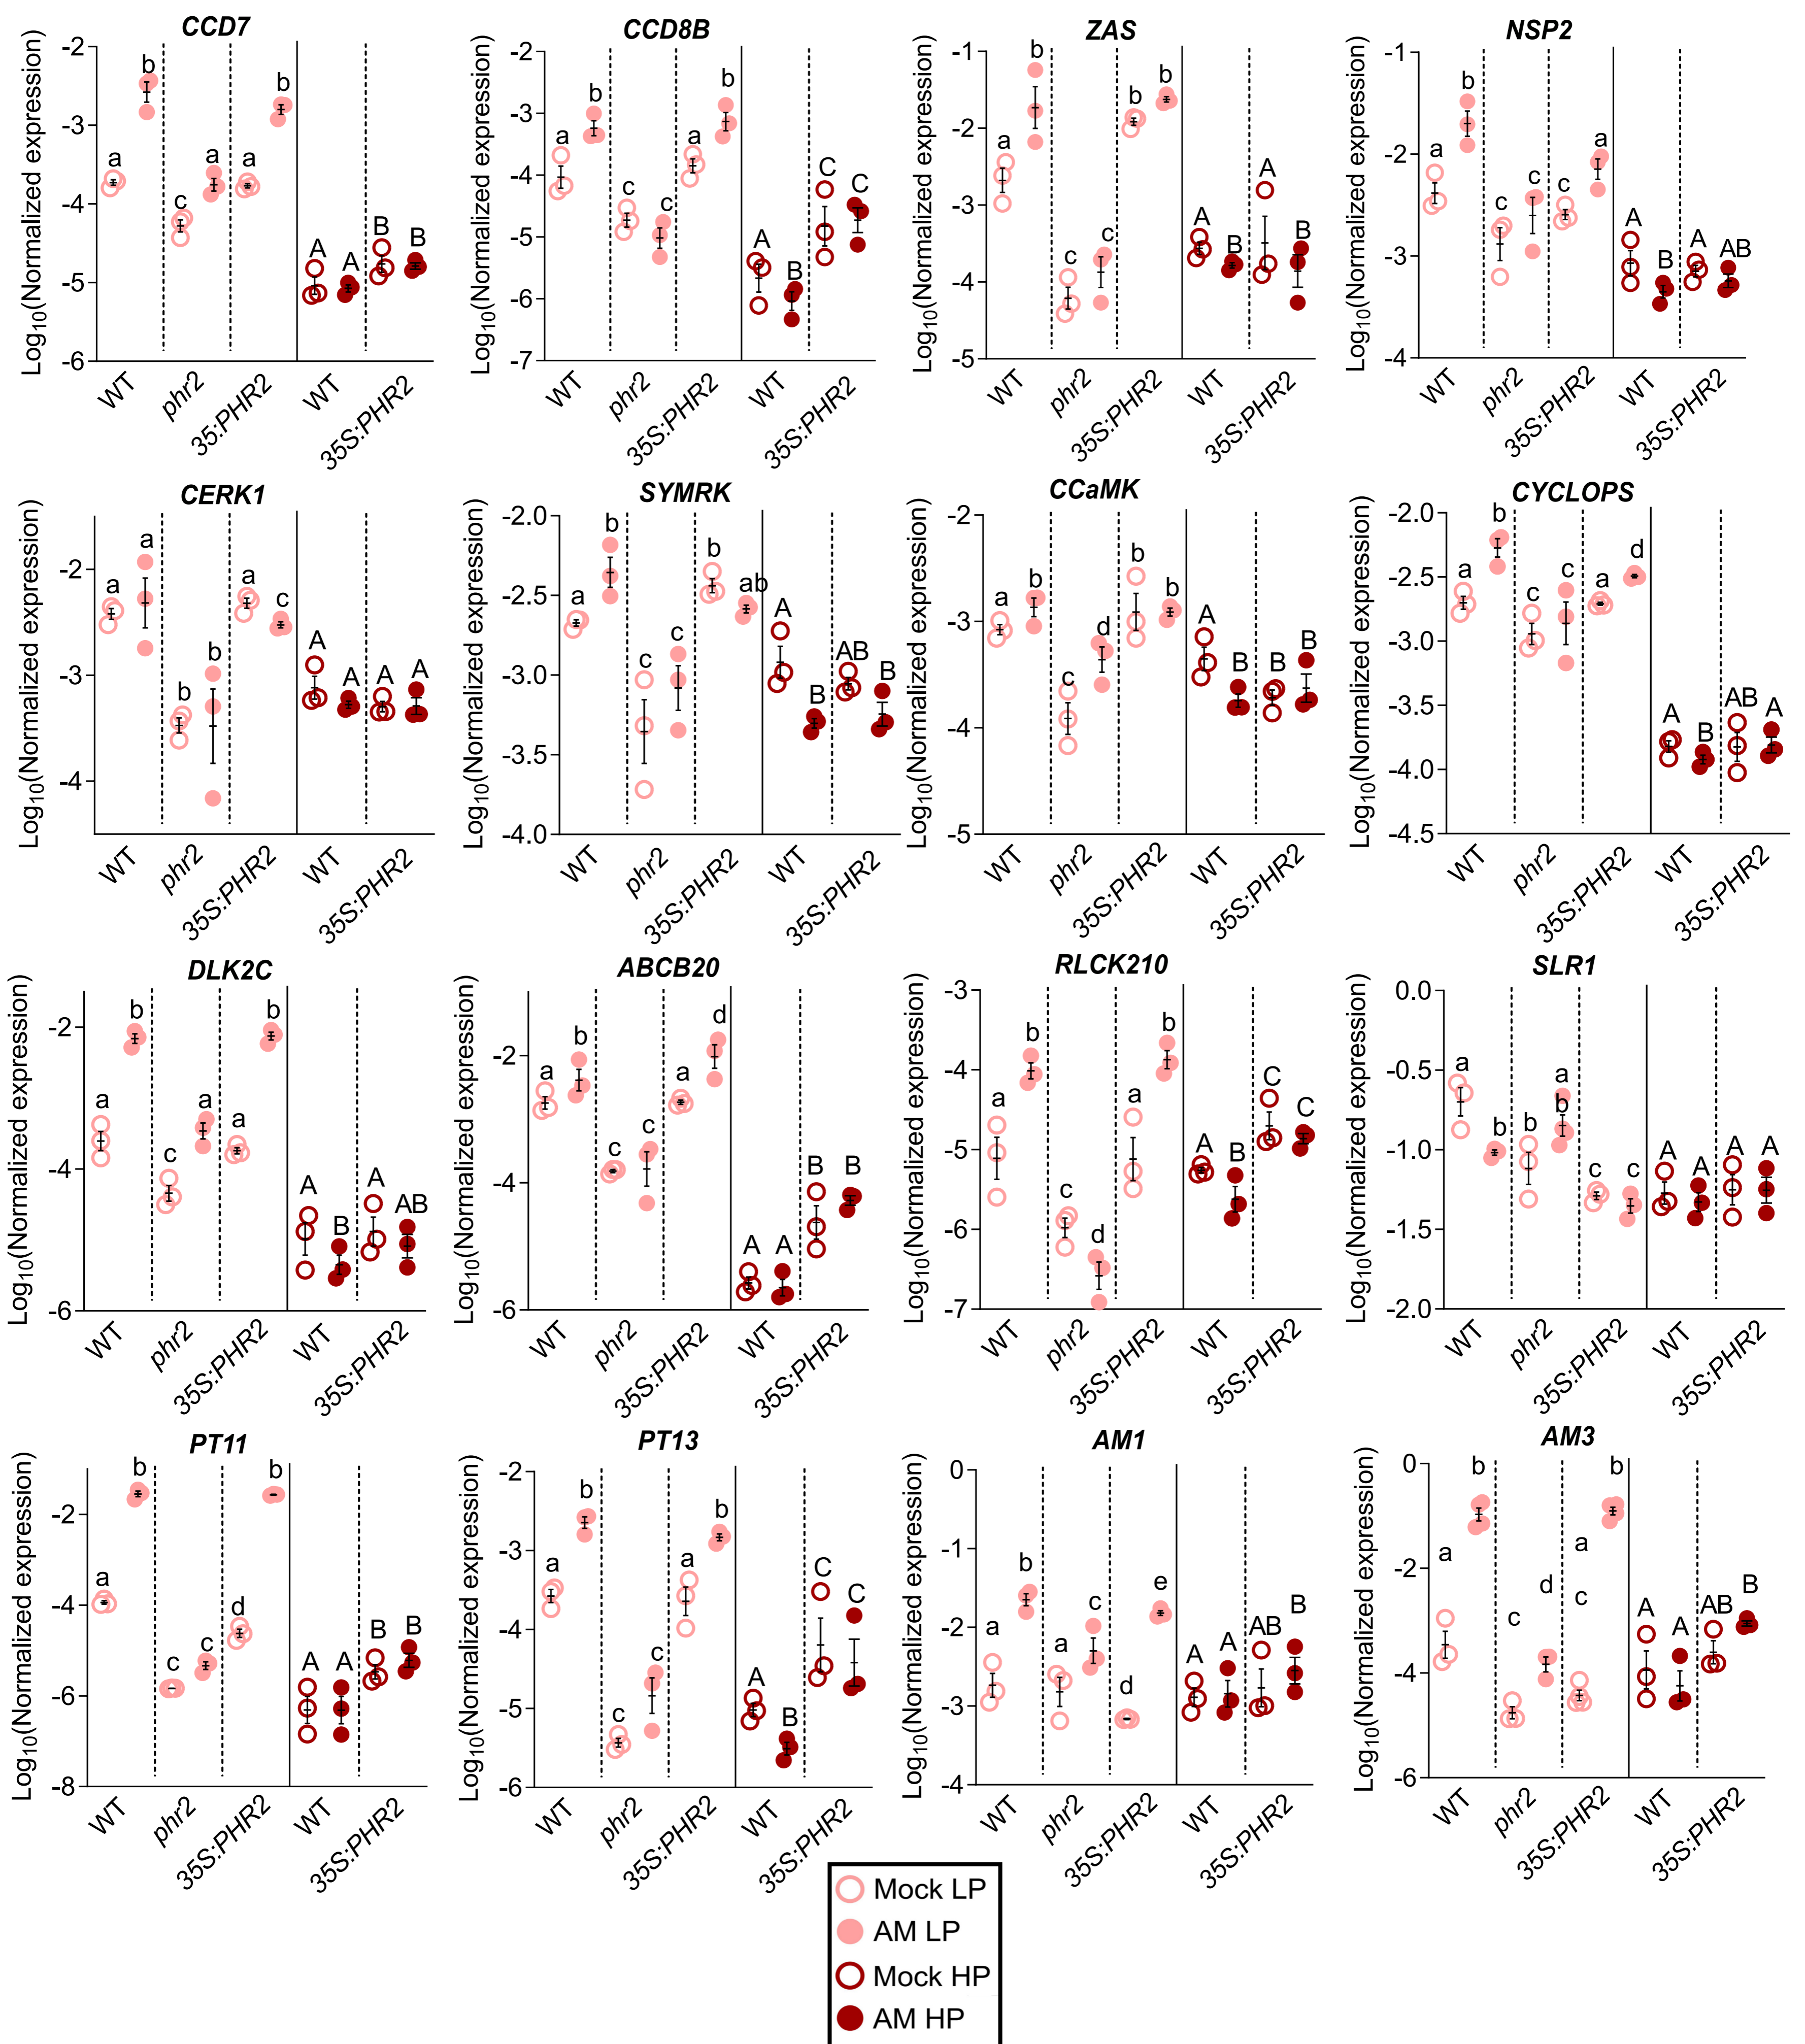

**Supplementary Figure 9. RT-qPCR-based transcript accumulation of selected DEGs recapitulates the RNA-Seq results.** Relative transcript accumulation in mock inoculated (Mock) and *R. irregularis* colonized (AM) roots of the indicated genotypes grown in quartz sand and fertilized with LP (25  $\mu\text{M}$   $\text{P}_i$ ) or HP (500  $\mu\text{M}$   $\text{P}_i$ ). Expression values of indicated genes were normalized to the geometric mean of the expression of two housekeeping genes, *UBIQUITIN* and *CYCLOPHILIN*. Letters indicate statistical differences between genotypes and treatments for each phosphate level separately. Statistics: Individual data-points and mean  $\pm$  SE are shown. N=3 biologically independent samples. Brown-Forsythe and Welch's One-Way ANOVA test with Games-Howell's multiple comparisons test was carried out between genotypes at each phosphate level separately. Different letters indicate statistical differences.

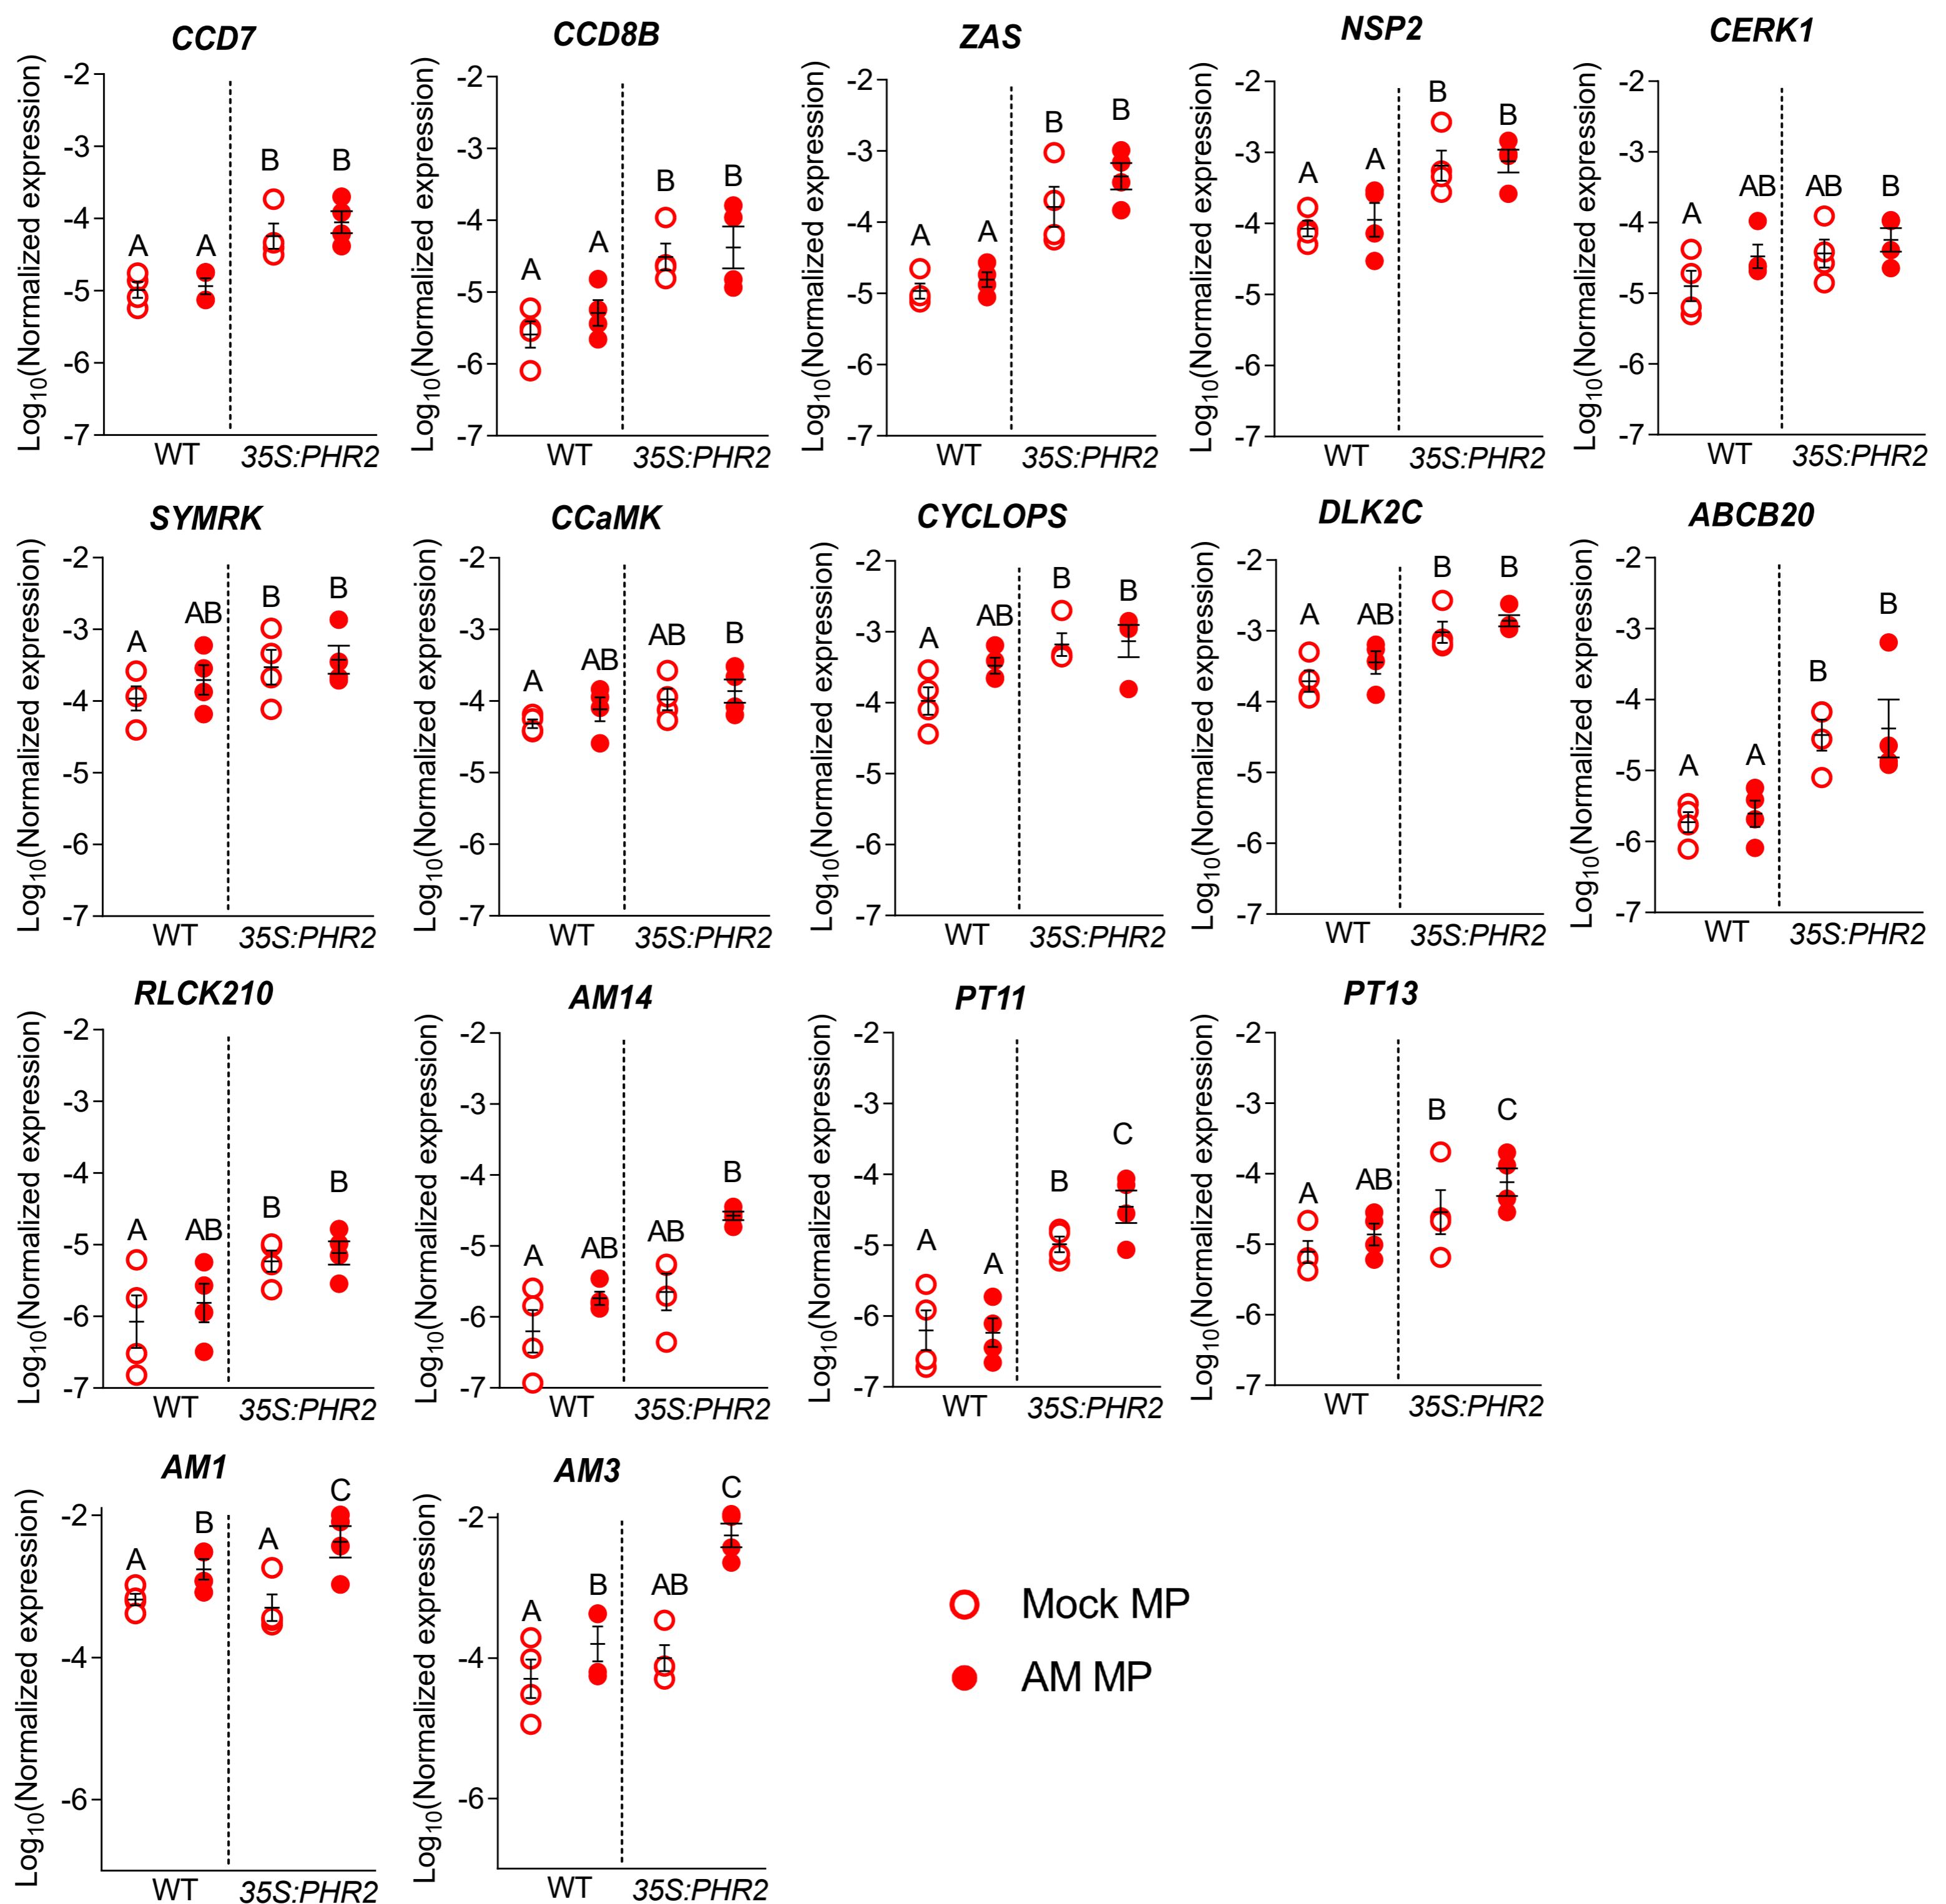

**Supplementary Figure 10. RT-qPCR-based transcript accumulation of selected DEGs at medium phosphate.** Relative transcript accumulation in mock inoculated (Mock) and *R.irregularis* colonized (AM) roots of the indicated genotypes grown in the same experiment as Fig. S3 in quartz sand and fertilized with MP is shown. Expression values of indicated genes were normalized to the geometric mean of the expression of two housekeeping genes, *UBIQUITIN* and *CYCLOPHILIN*. Letters indicate statistical differences between genotypes and treatments within each phosphate level. Statistics: Individual data-points and mean  $\pm$  SE are shown. N=3-4 biologically independent samples. Brown-Forsythe and Welch's One-Way ANOVA test with Games-Howell's multiple comparisons test was carried out. Different letters indicate statistical differences.

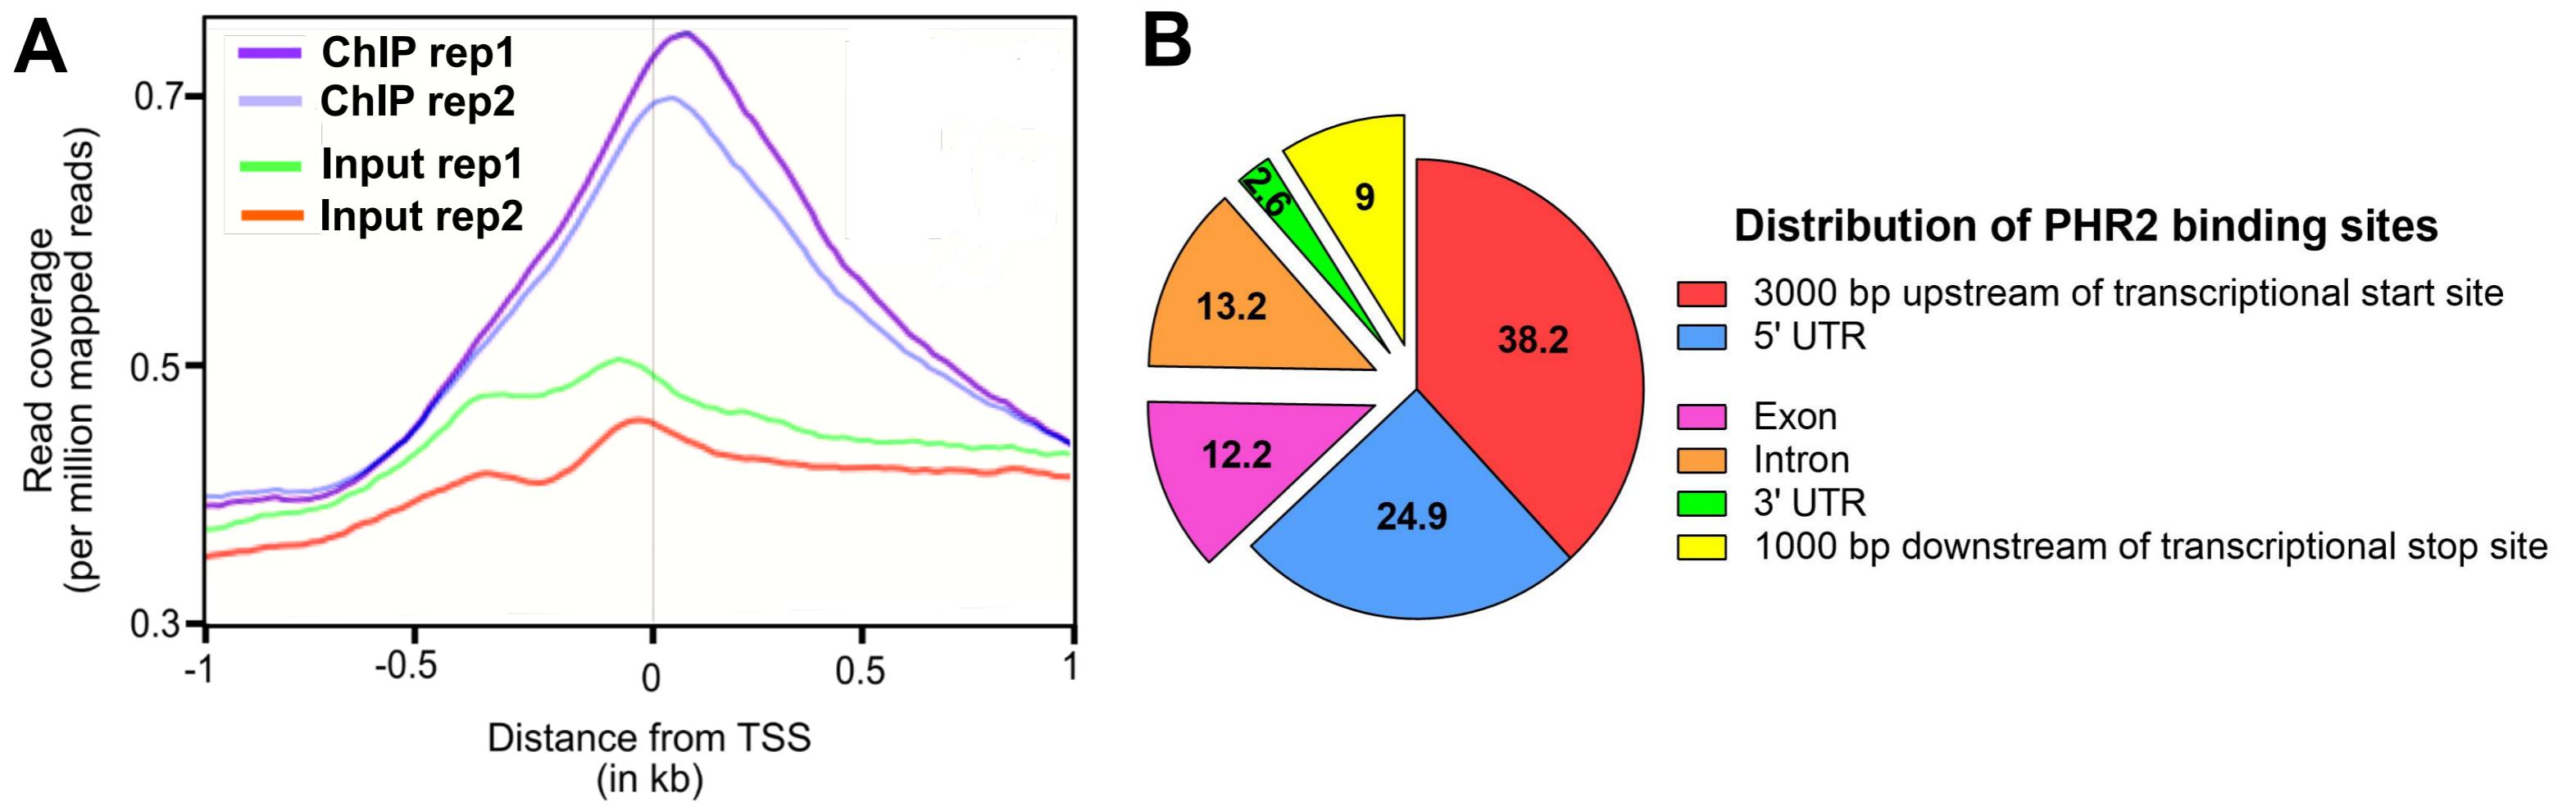

**Supplementary Figure 11. ChIP-Seq binding peaks of PHR2-FLAG are enriched near the transcriptional start site.** (A) Read coverage plot for the two biological replicates from ChIP-Seq with FLAG tagged PHR2 protein. TSS, transcriptional start site. (B) Distribution of PHR2-binding sites in the rice genome. ChIP-Seq read distribution in relation to transcriptional start site (TSS) suggested a slight skew in the distribution of PHR2 binding sites towards 1000 bp downstream of TSS. Correspondingly, PHR2 binding sites are enriched not only in 3000 bp region upstream of TSS (38.2%) but also in the regions downstream of TSS such as 5' UTR, exon and intron (24.9% + 12.2% + 13.2% = 50.3%).

## ChIP replicate 1

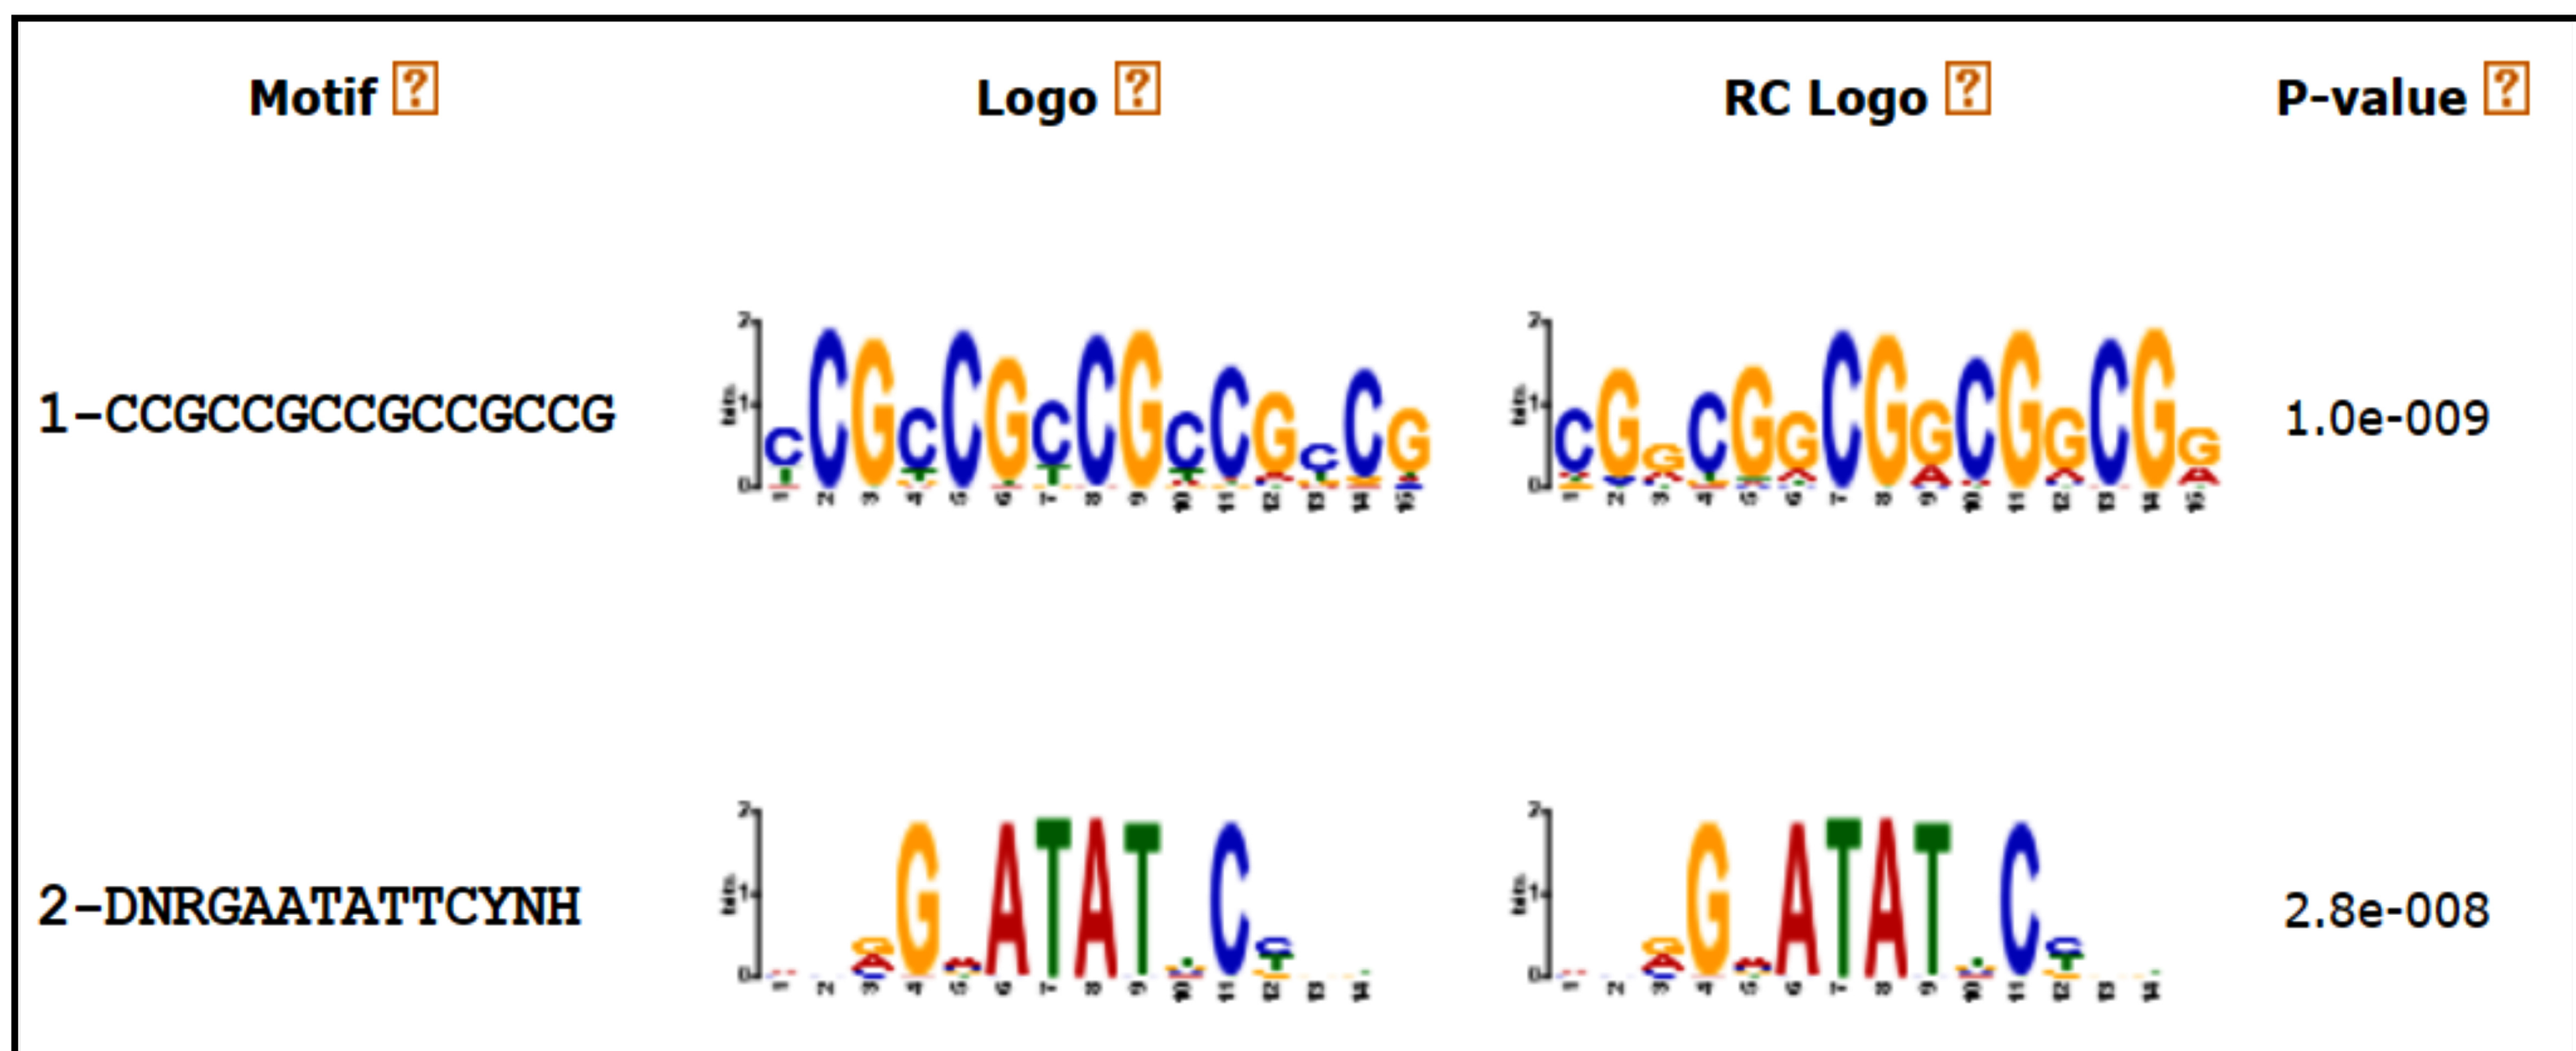

## ChIP replicate 2

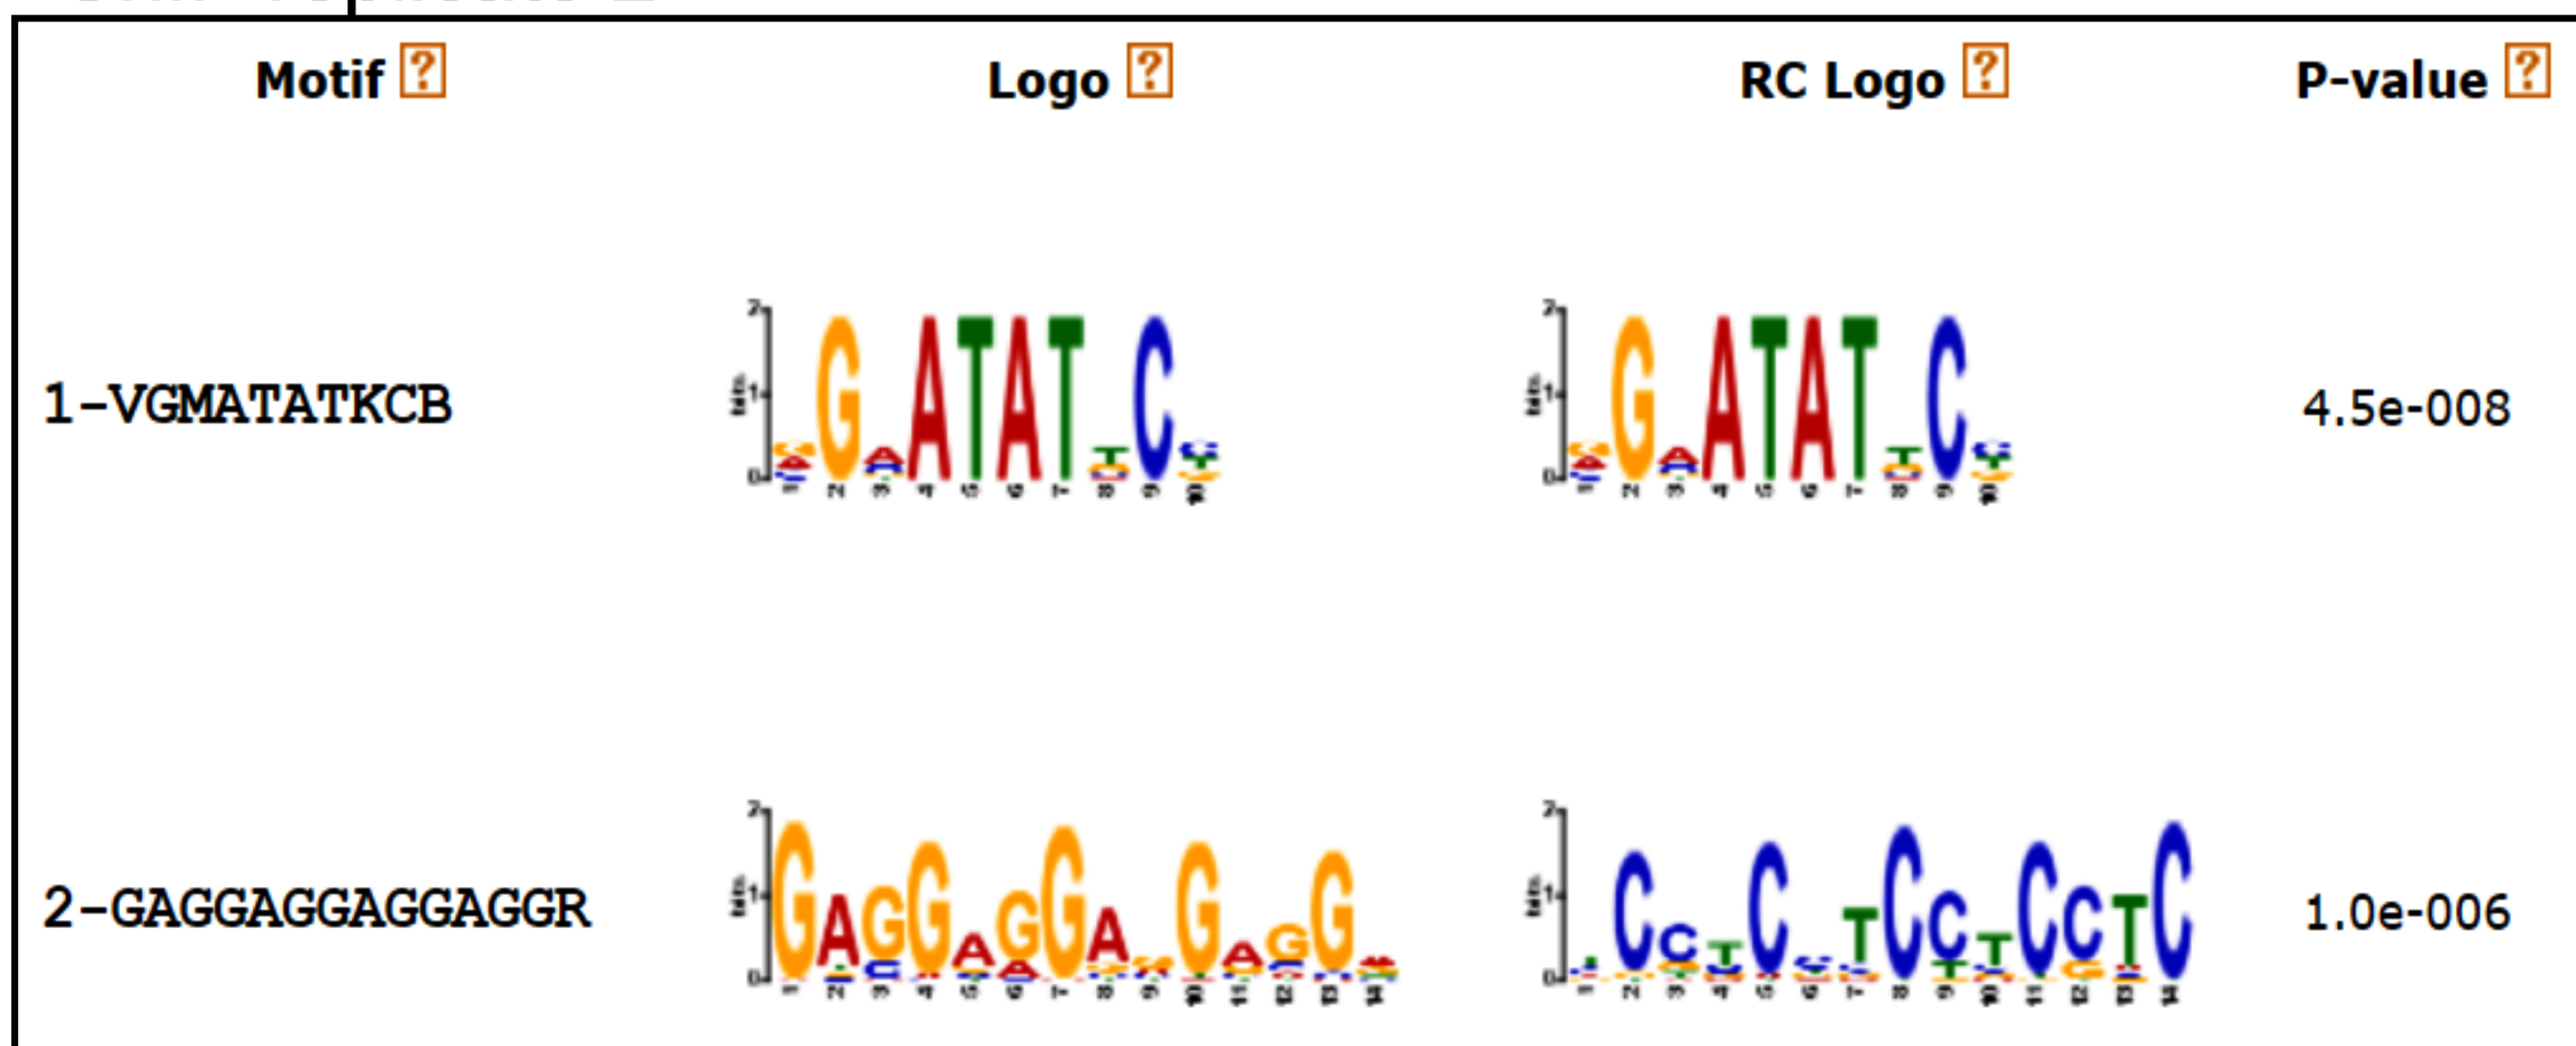

**Supplementary Figure 12. Motifs over-represented in DNA sequences with PHR2 binding sites.** Analysis was carried out separately for the two biological ChIP-Seq replicates using STREME (<https://meme-suite.org/meme/tools/streme>).

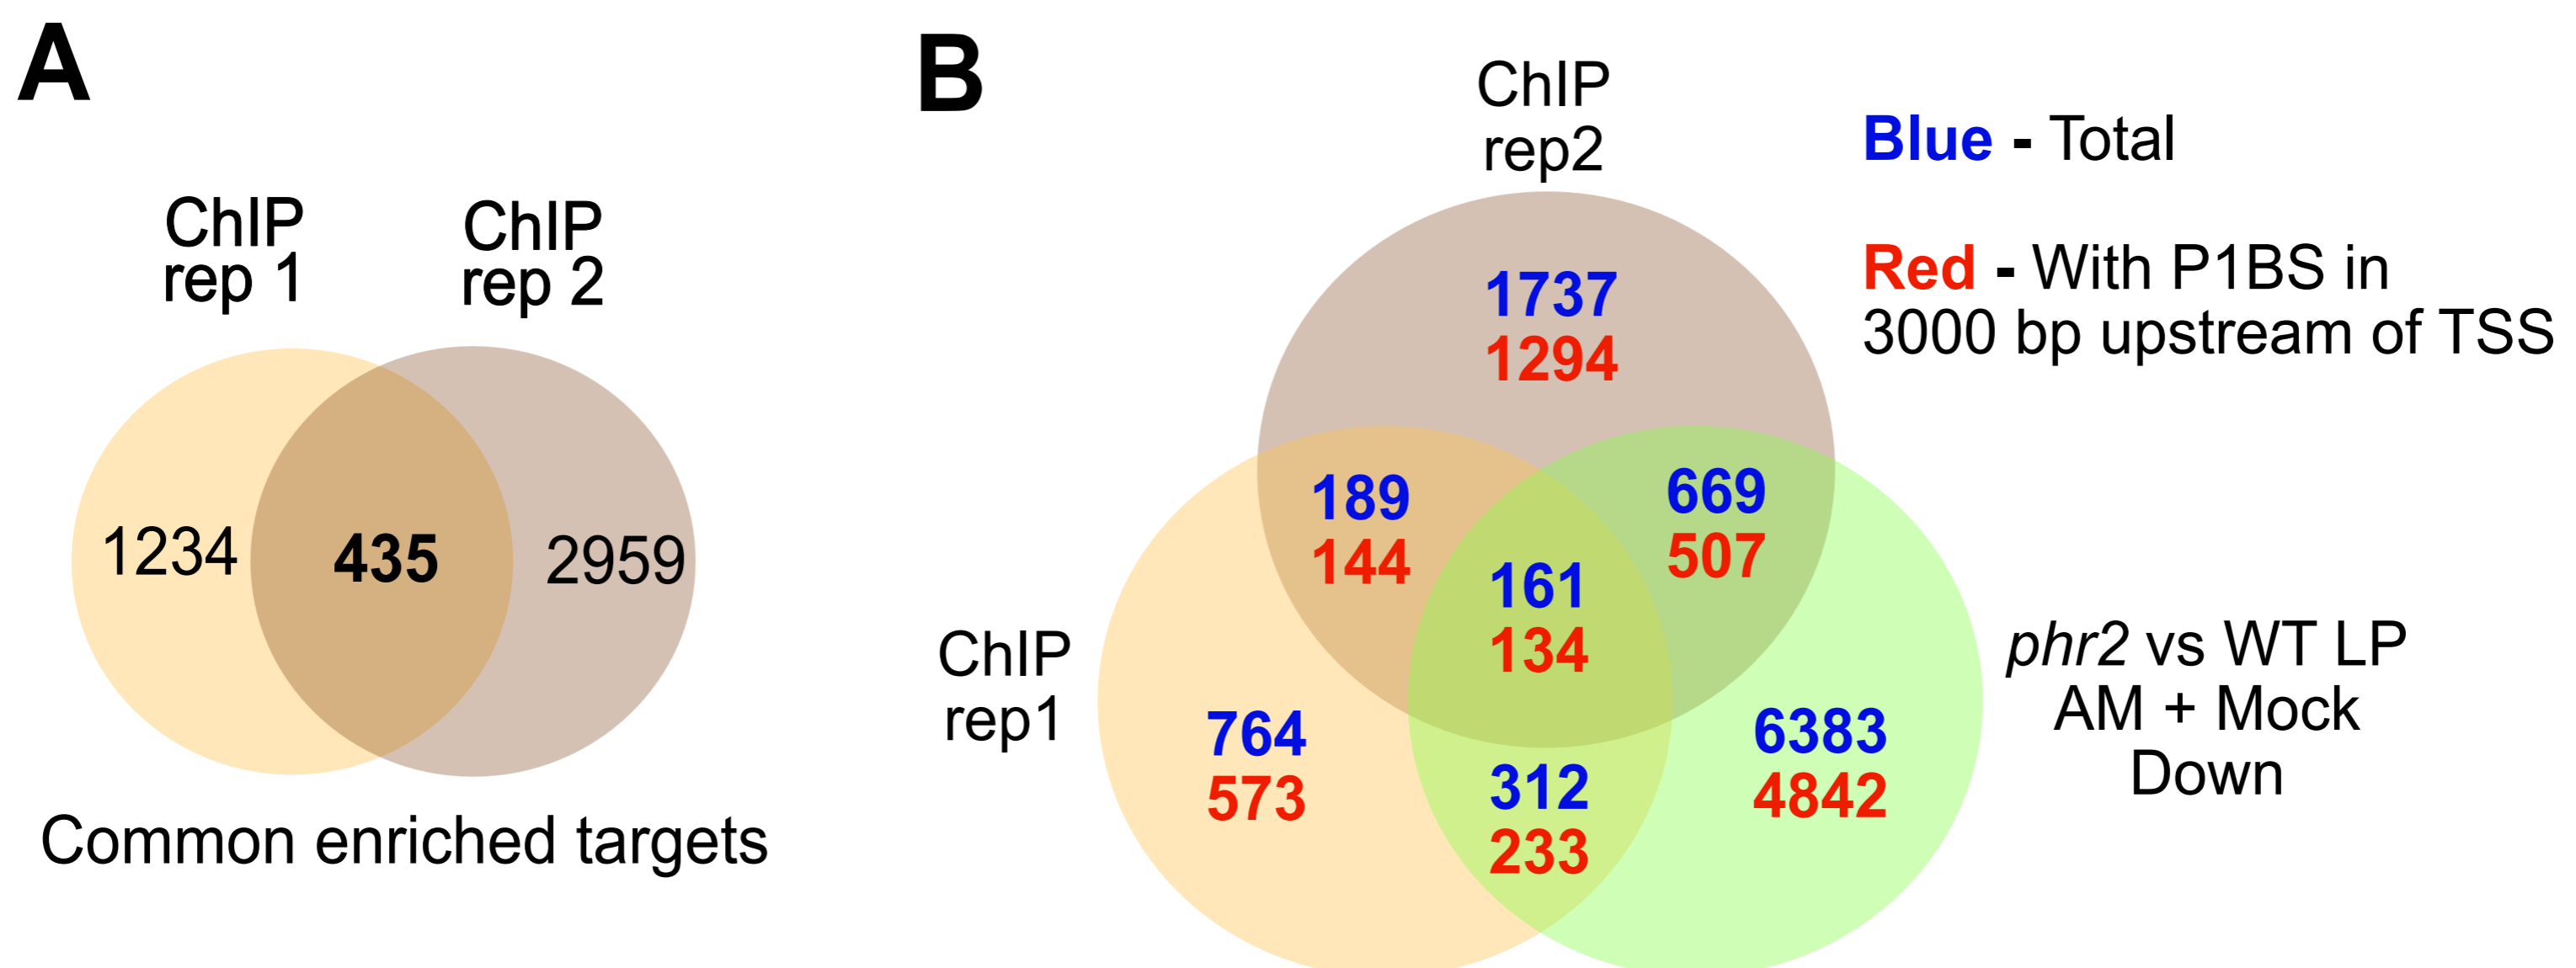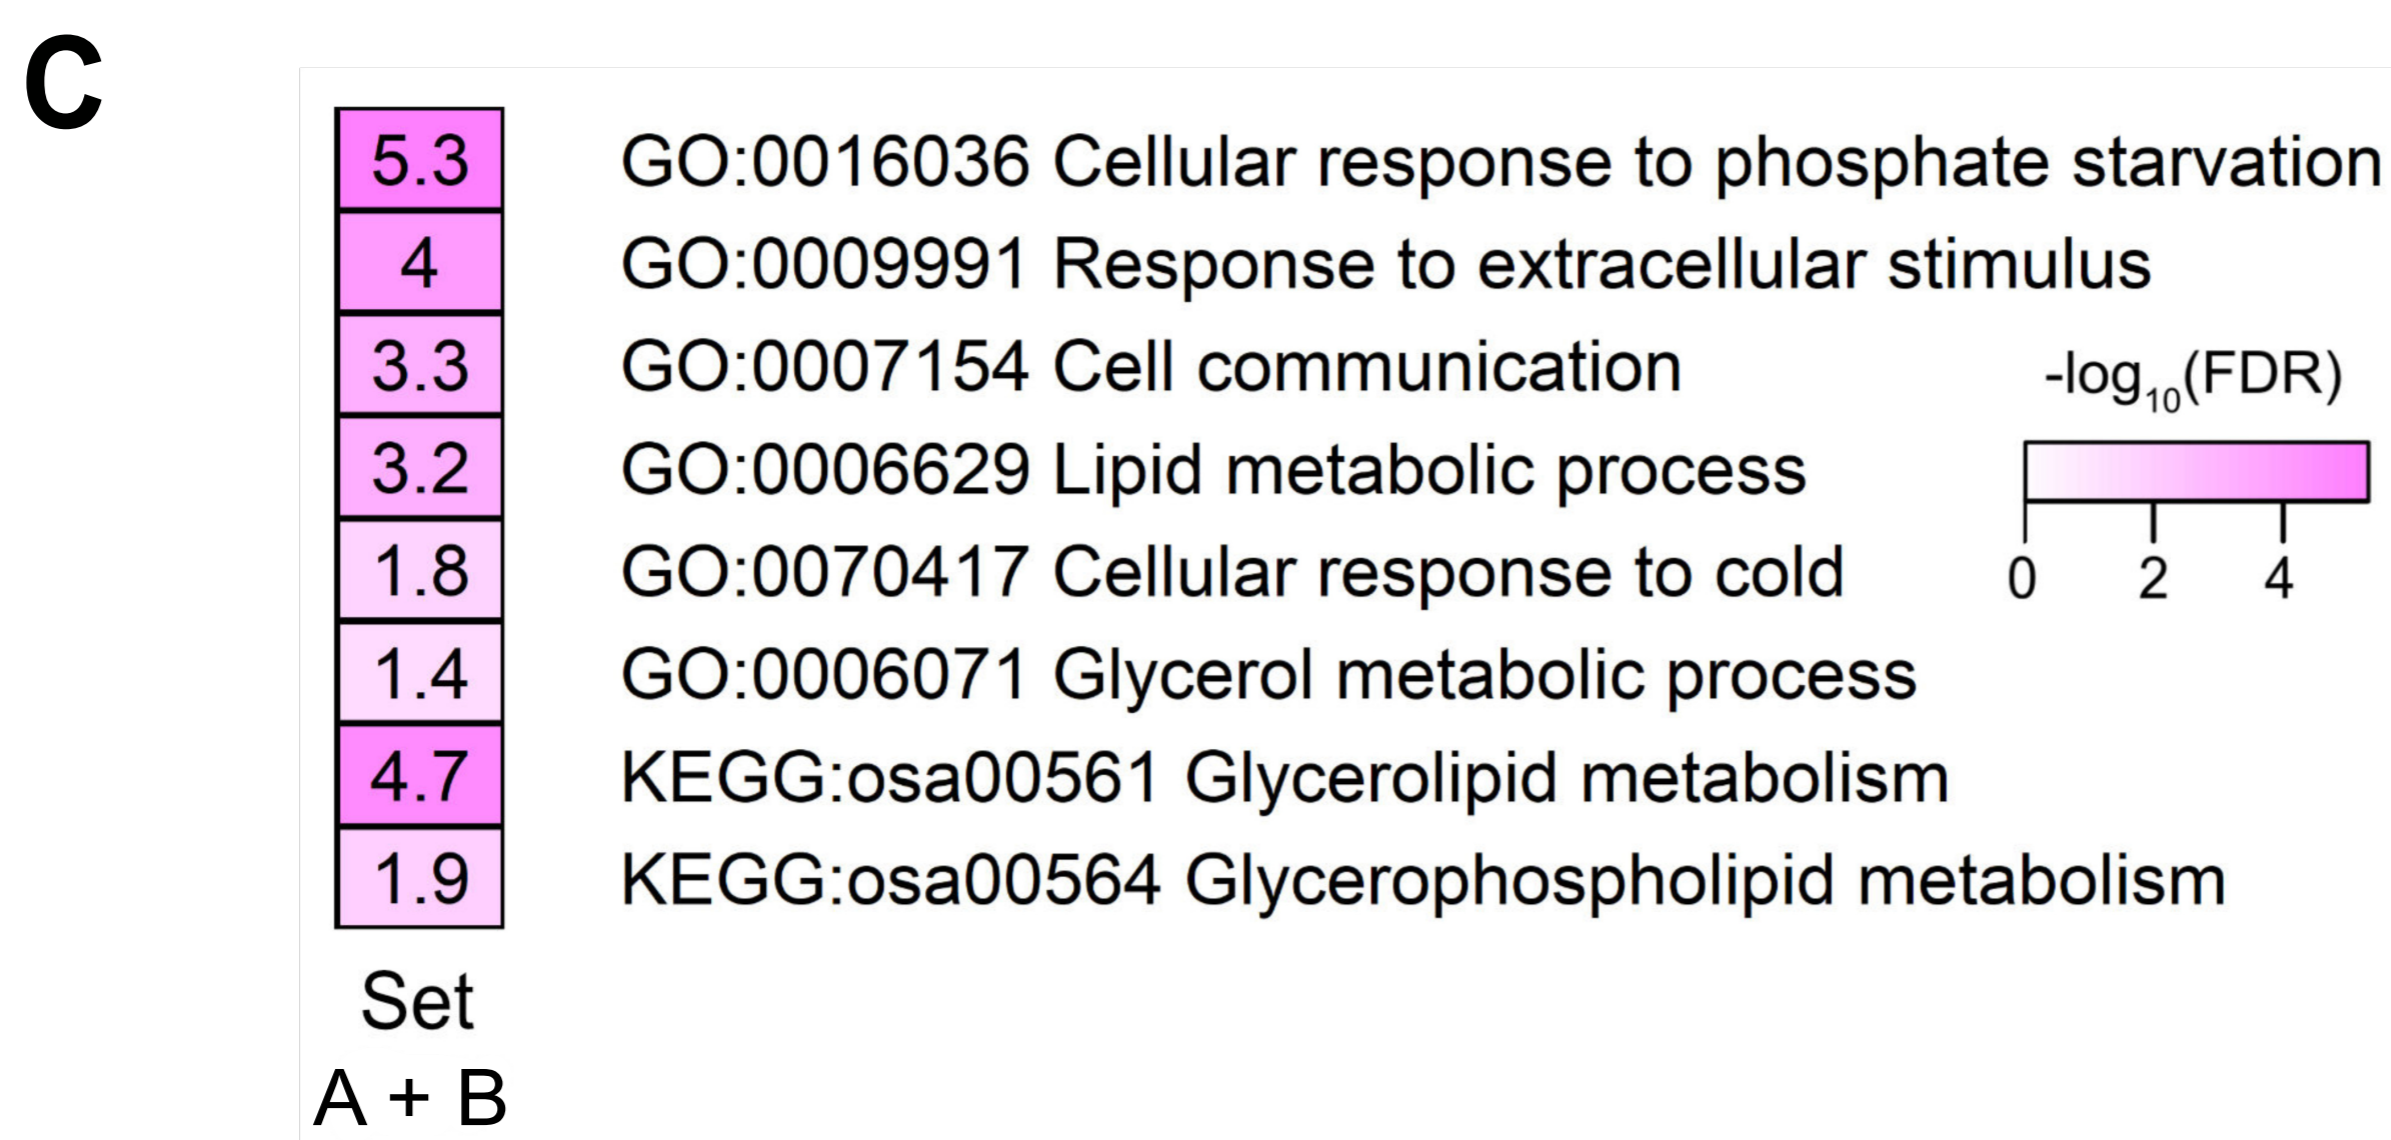

**D**

| Enriched motifs (Set A + B) | E-value  | Significance |
|-----------------------------|----------|--------------|
| GAATATGC   GCATATTC         | 1.00E-05 | 4.99         |
| GAATATCC   GGATATTC         | 5.00E-05 | 4.3          |

**Supplementary Figure 13. Binding site analysis for rice PHR2.** (A) Venn diagram showing overlap of PHR2 ChIP targets from two independent biological ChIP-Seq replicates. These 435 common PHR2 ChIP targets are genes annotated closest to PHR2-binding sites in both replicates. (B) Venn diagram showing overlap of PHR2 targets with DEGs with reduced expression in *phr2* vs WT AM + Mock samples at LP. Blue indicates the total number of genes and red with P1BS or P1BS-like motif in 3000 bp upstream region upstream of transcriptional start site (TSS)). MSU IDs in the three individual gene sets were converted to RAPDB Locus IDs (to facilitate extraction of upstream sequence from RAPDB website, <https://rapdb.dna.affrc.go.jp/>). This resulted in a smaller number of genes than the original number of MSU ID DEGs. (C) GO-term enrichment in category “biological process” for Set A + Set B genes (167 genes out of 435 PHR2 targets which are repressed in AM or Mock root samples of *phr2* vs WT grown at LP as shown in Fig. 3A). Darker colors indicate stronger enrichment of GO-terms. GO-terms include categories involved in phosphate starvation signalling as well as AM. (D) Motifs enriched in 1000 bp sequence (upstream of TSS) for Set A + B genes in Fig. 3A.

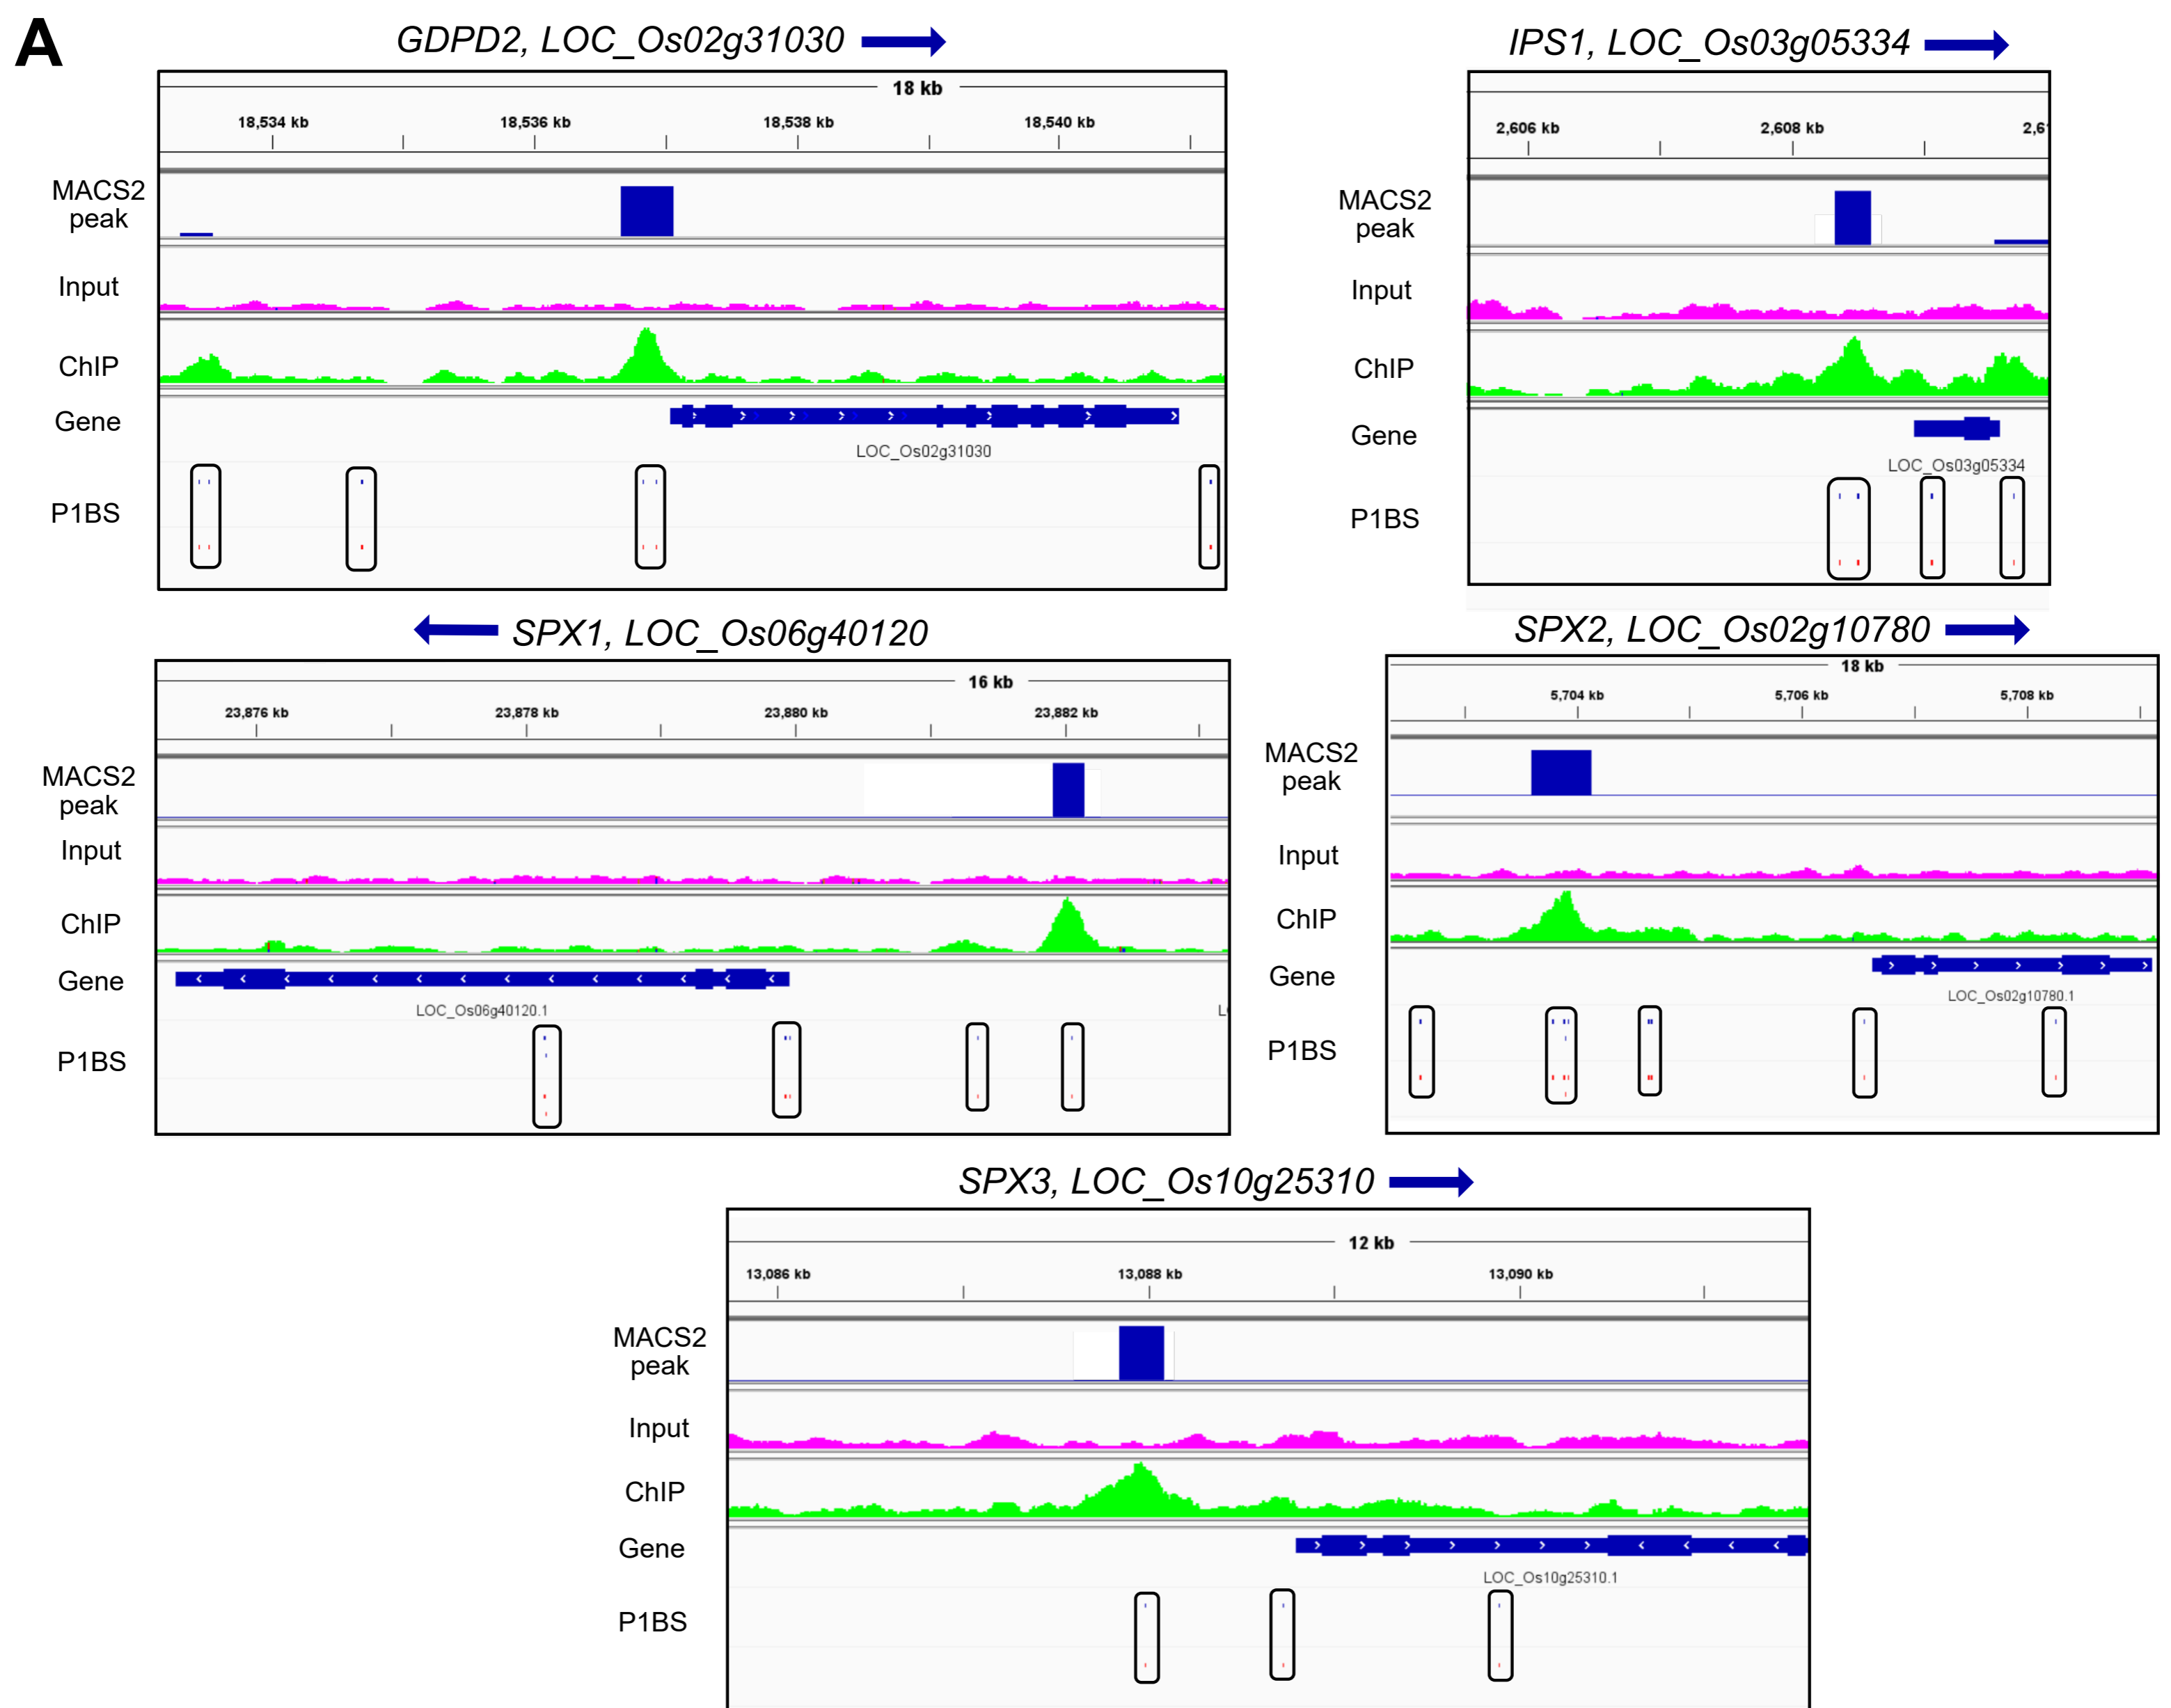

**B**

| Locus ID |       | Gene  |       |                |              |
|----------|-------|-------|-------|----------------|--------------|
| -5.01    | -3.64 | 1.56  | 0     | LOC_Os10g25310 | <i>SPX3</i>  |
| -2.82    | -0.74 | 1.53  | 2.18  | LOC_Os03g05334 | <i>IPS1</i>  |
| -1.85    | -1.31 | 0     | -0.54 | LOC_Os06g40120 | <i>SPX1</i>  |
| -1.54    | -1.62 | -1.76 | -2.03 | LOC_Os02g10780 | <i>SPX2</i>  |
| -1.47    | -0.98 | 0.9   | 1.24  | LOC_Os02g31030 | <i>GDPD2</i> |

Mock AM Mock AM  
*phr2* vs WT 35S:PHR2 vs WT

LP HP

Log<sub>2</sub>(Fold-Change)

**Supplementary Figure 14. IGV browser view of ChIP-Seq peaks adjacent to previously known PHR2 target genes. (A)** ChIP-Seq peak profiles of genes which have been previously shown to be PHR2 targets. Gene orientation is indicated by the direction of the blue arrow close to the gene name. MACS2 peaks (blue bars) denote PHR2 binding sites corresponding to enrichment of PHR2-FLAG IP (green color) sequencing reads vs Input (pink color) sequencing reads. Positions of P1BS elements along the genomic coordinate are marked by enclosing the motifs in black rectangular boxes. **(B)** RNA-Seq based log<sub>2</sub>(Fold-change) of these known PHR2 target genes in for *phr2* vs wild type and 35S:PHR2 vs wild type at LP (25 μM) and HP (500 μM), respectively. The phosphate level at HP (500 μM) maybe high enough to prevent the transcriptional induction of some of these phosphate starvation response genes such as *SPX1* and 2 in the 35S:PHR2 line.

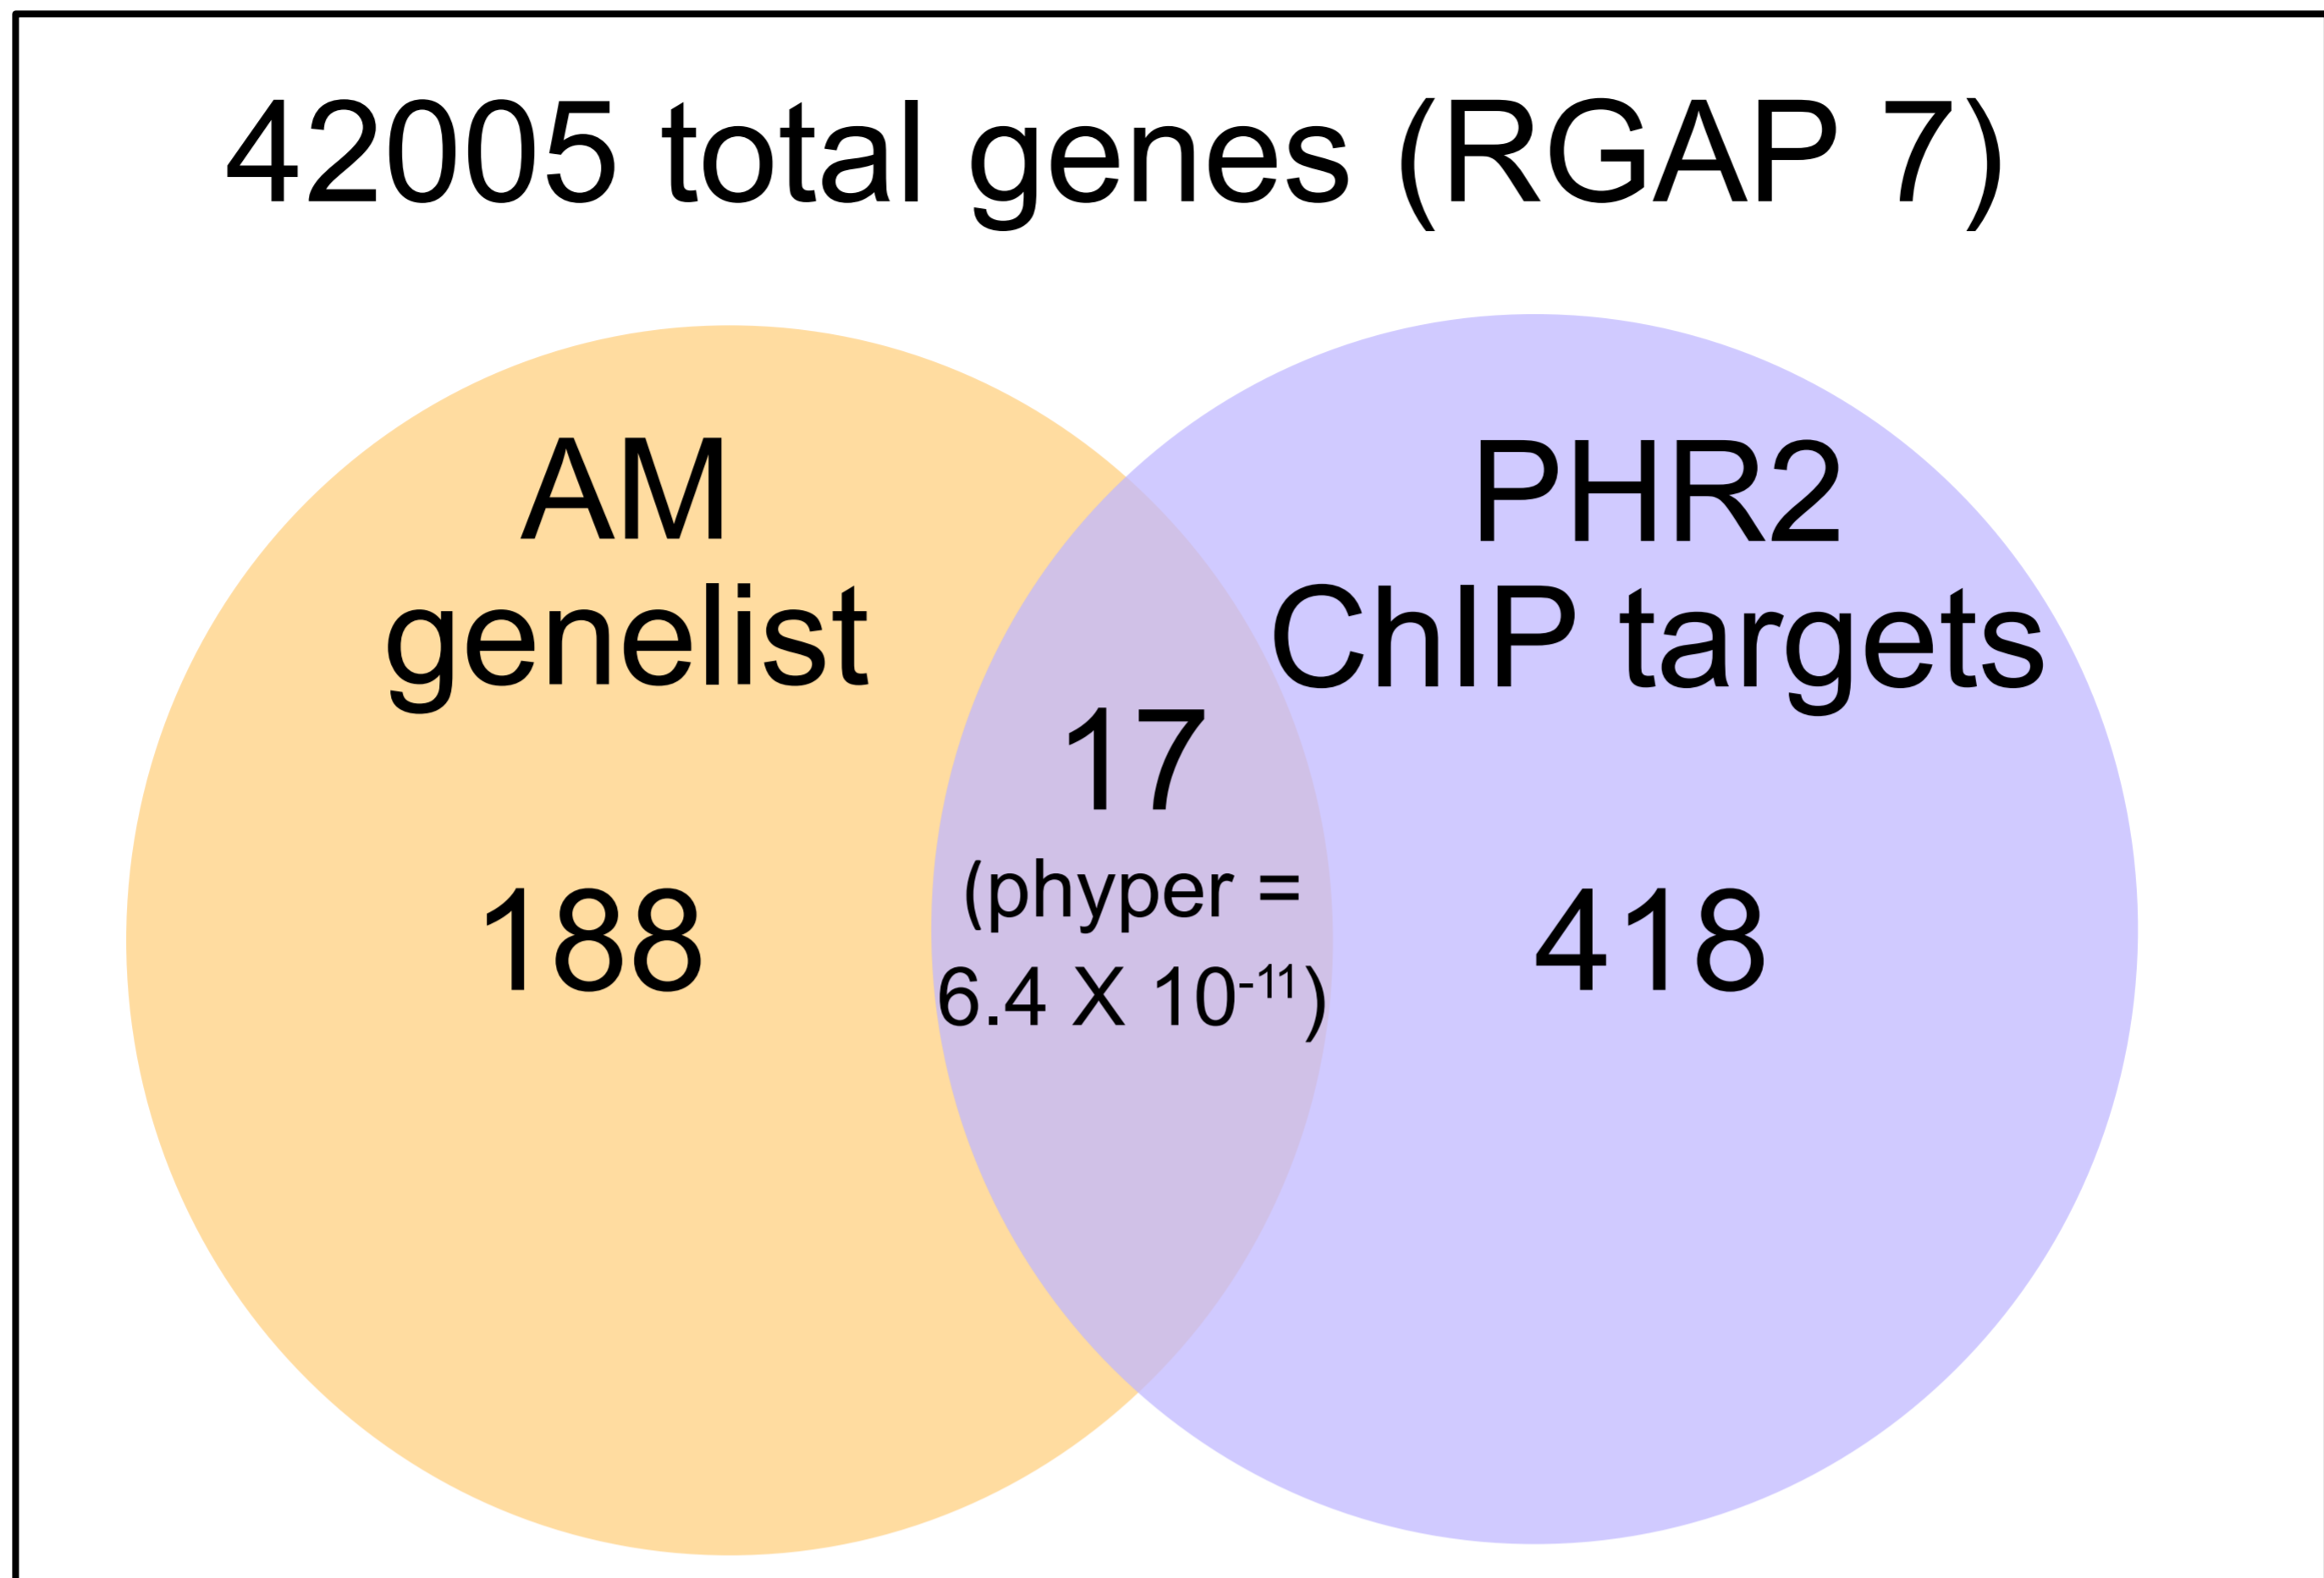

**Supplementary Figure 15. Enrichment of PHR2 ChIP targets in AM genelists.** Hypergeometric test was used to assess the statistical significance (phyper) of overlap of PHR2 ChIP targets with the AM genelists.



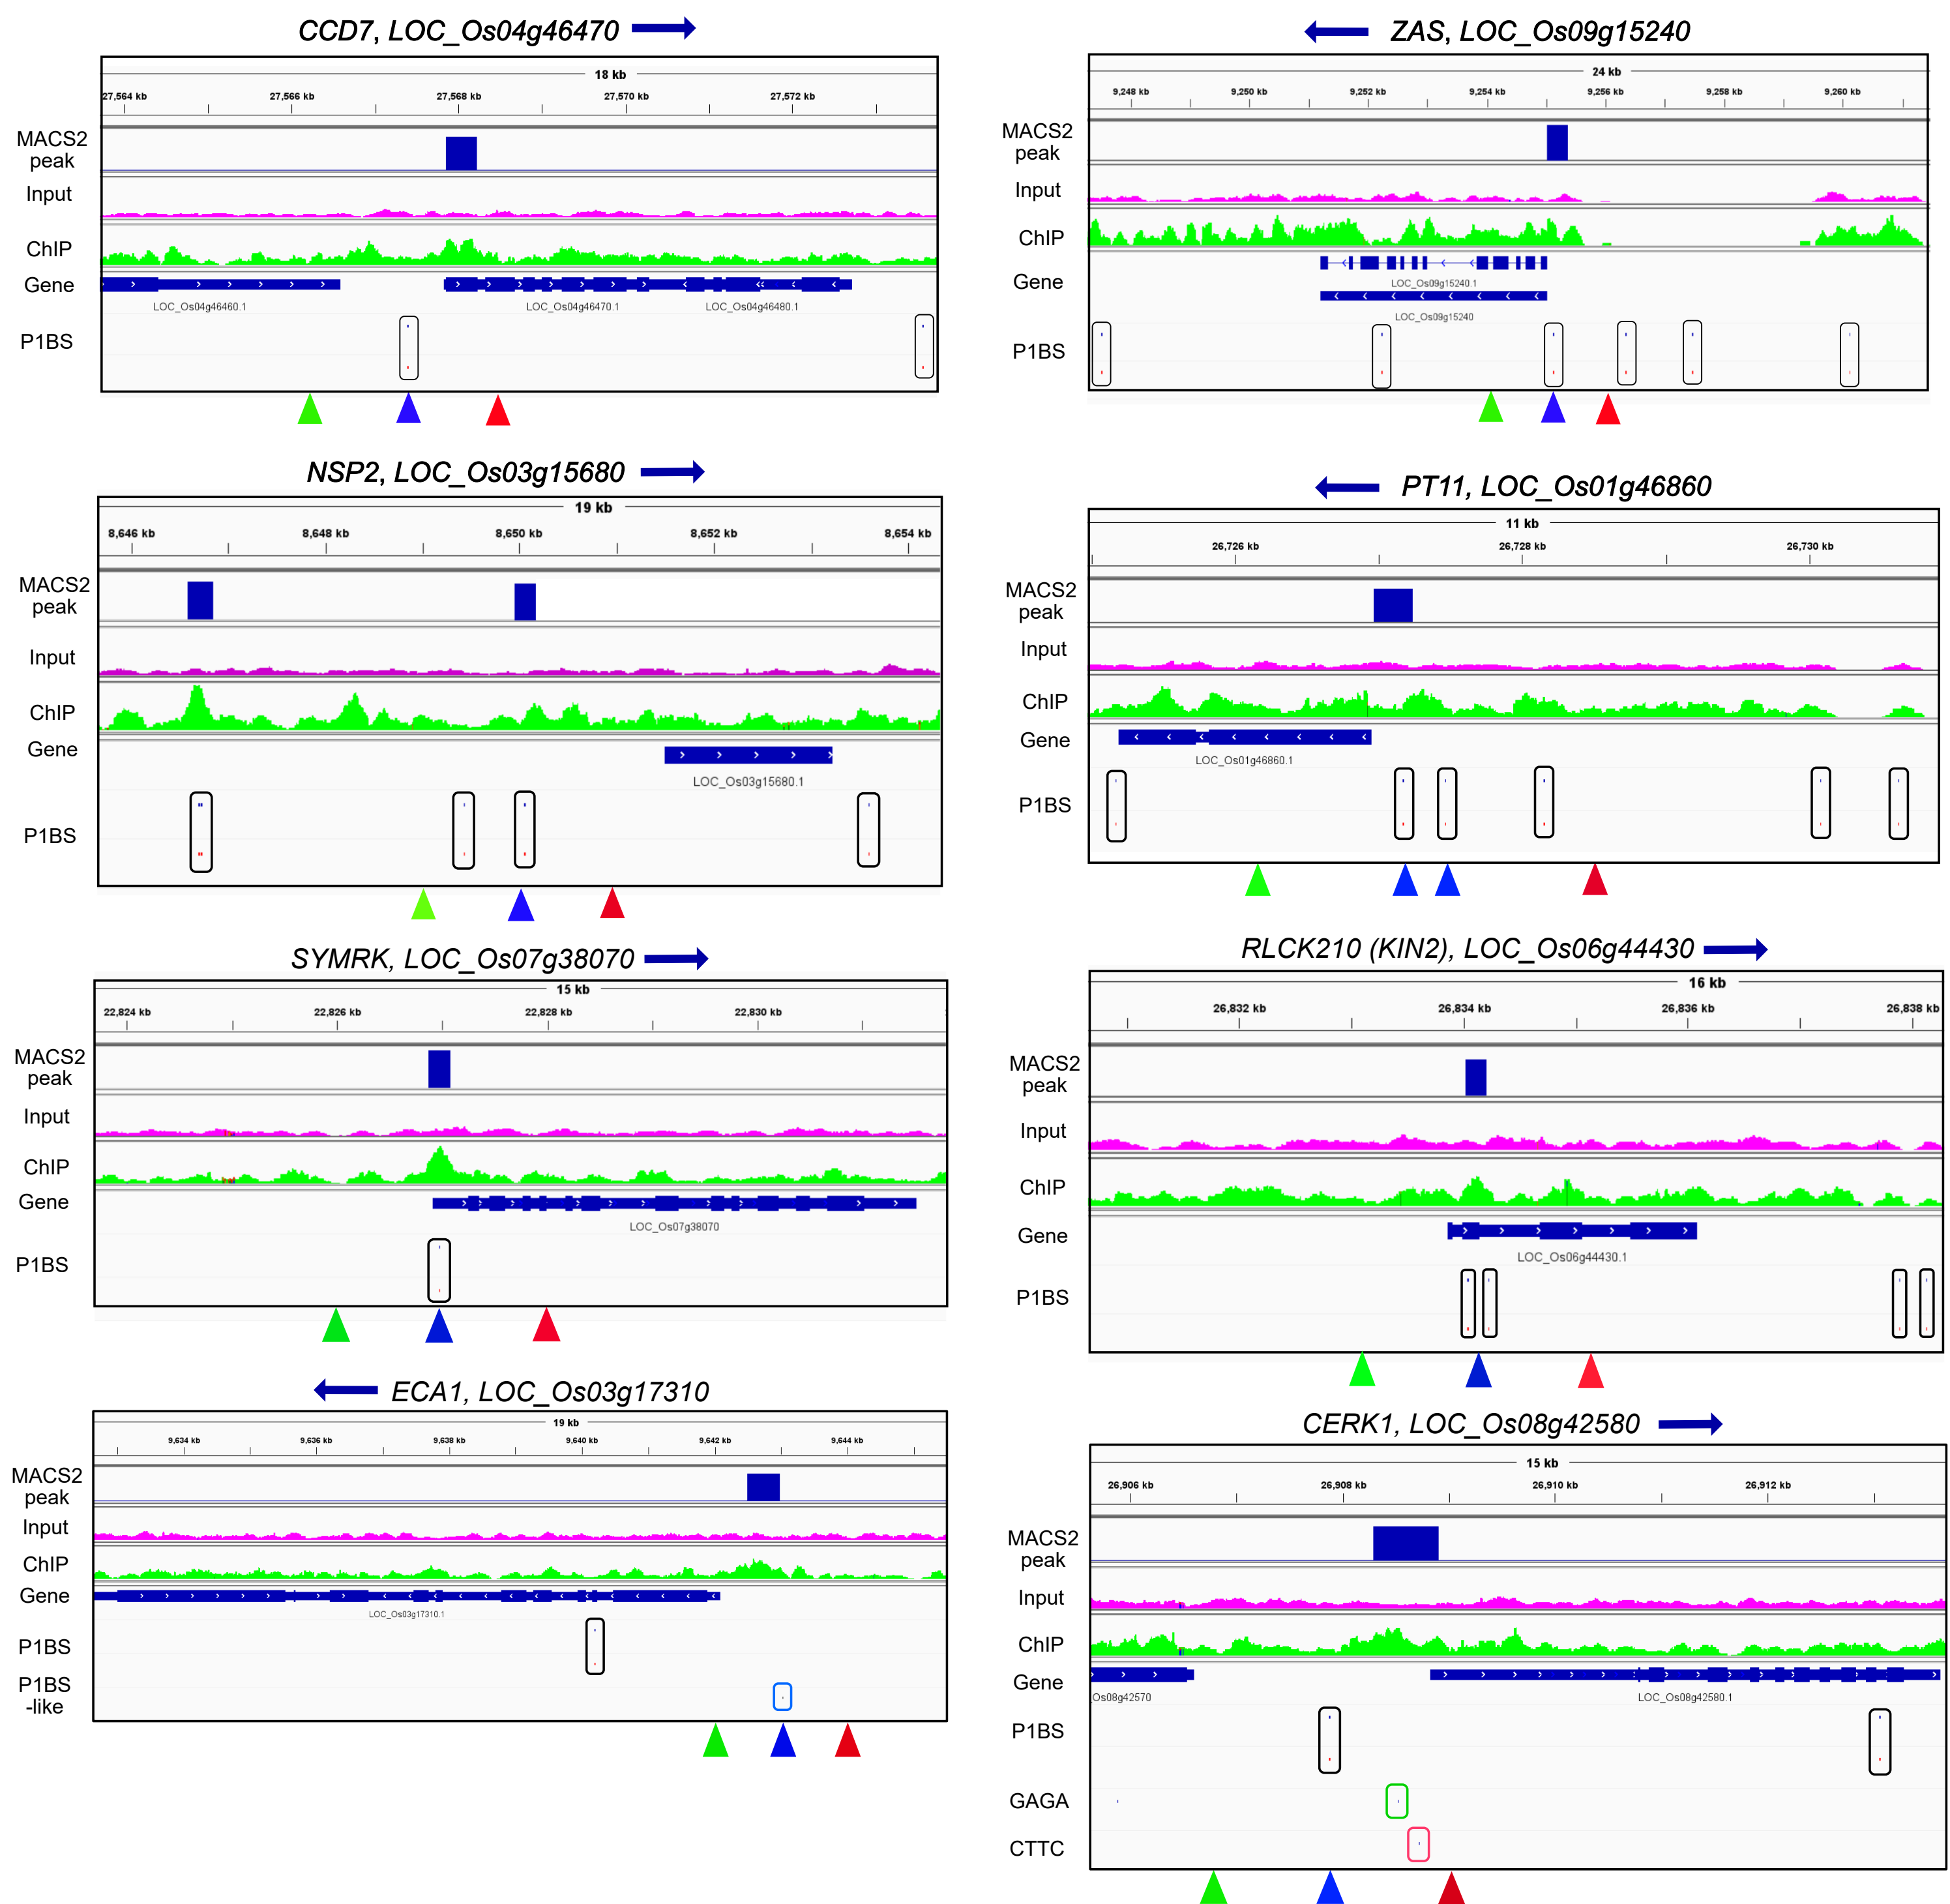

**Supplementary Figure 16. IGV browser view of ChIP-Seq peaks adjacent to AM-relevant genes.** The selected genes are those depicted in red in Fig. 3C. Gene orientation is indicated by the direction of the blue arrow next to the gene name. MACS2 peaks (blue bars) indicate PHR2 binding sites corresponding to enrichment of PHR2-FLAG IP (green color) sequencing reads vs Input (pink color) sequencing reads. The positions of P1BS elements along the genomic coordinate are marked by enclosing the motifs in black rectangular boxes. In the *ECA1* promoter, the P1BS-like motif is marked by a blue rectangular box. In the *CERK1* promoter, the GAGA and CTTC motifs are marked by enclosing them in green and red rectangular boxes, respectively. Blue triangles indicate the position of ChIP-qPCR (Fig. S15) primers flanking the P1BS motifs, while green and red triangles indicate the position of primers 1000 bp left (5') of P1BS (-1000 bp) and +1000 bp right (3') of P1BS (+1000 bp), respectively. Motifs: P1BS is GNATATNC; P1BS-like is AMATATYC; GAGA is GGAGAGGA; CTTC is TCCTCTTGTTCCTTC.

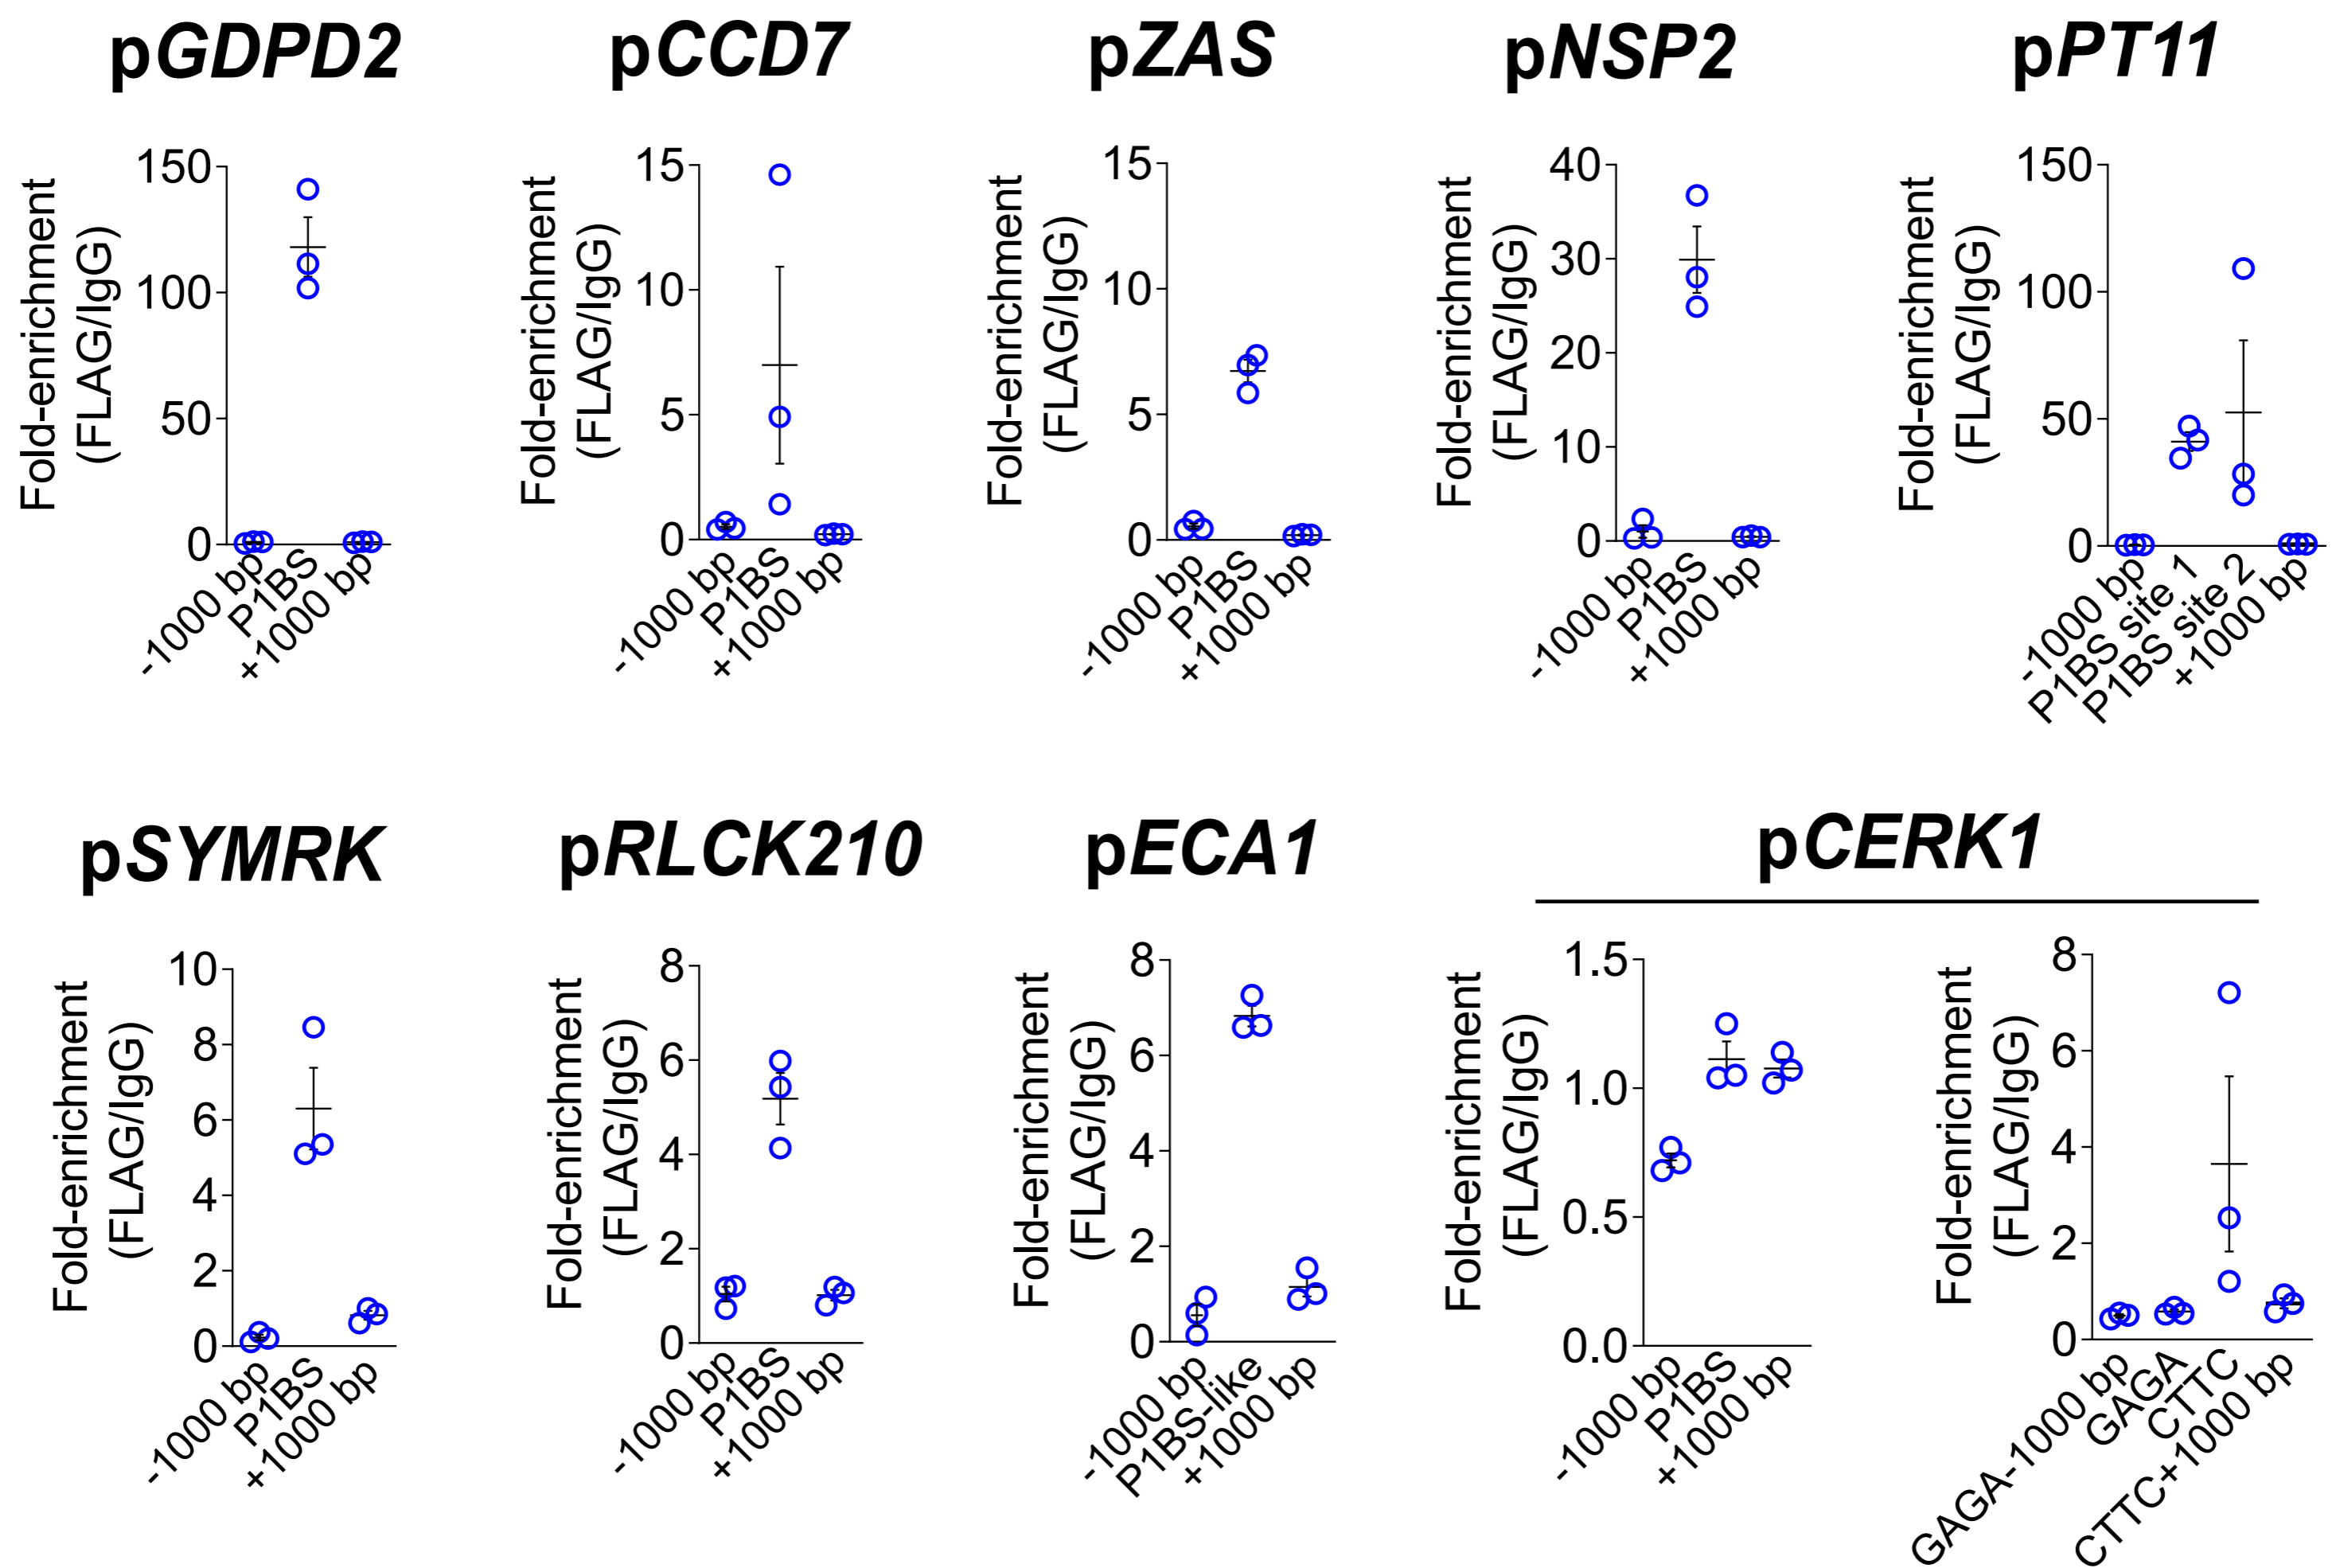

**Supplementary Figure 17. Enrichment of PHR2 at P1BS promoter motifs detected by CHIP-qPCR.** Primers were designed to amplify regions flanking motifs (P1BS, P1BS-like, GAGA, CTTC), and 1000 bp left (5') of these motifs (-1000 bp) and 1000 bp right (3') of these motifs (+1000 bp). Motifs: P1BS is GNATATNC; P1BS-like is AMATATYC; GAGA is GGAGAGGA; CTTC is TCCTCTTGTTCTTC. Data: Individual data-points and mean  $\pm$  SE are shown. N=3 biologically independent samples.

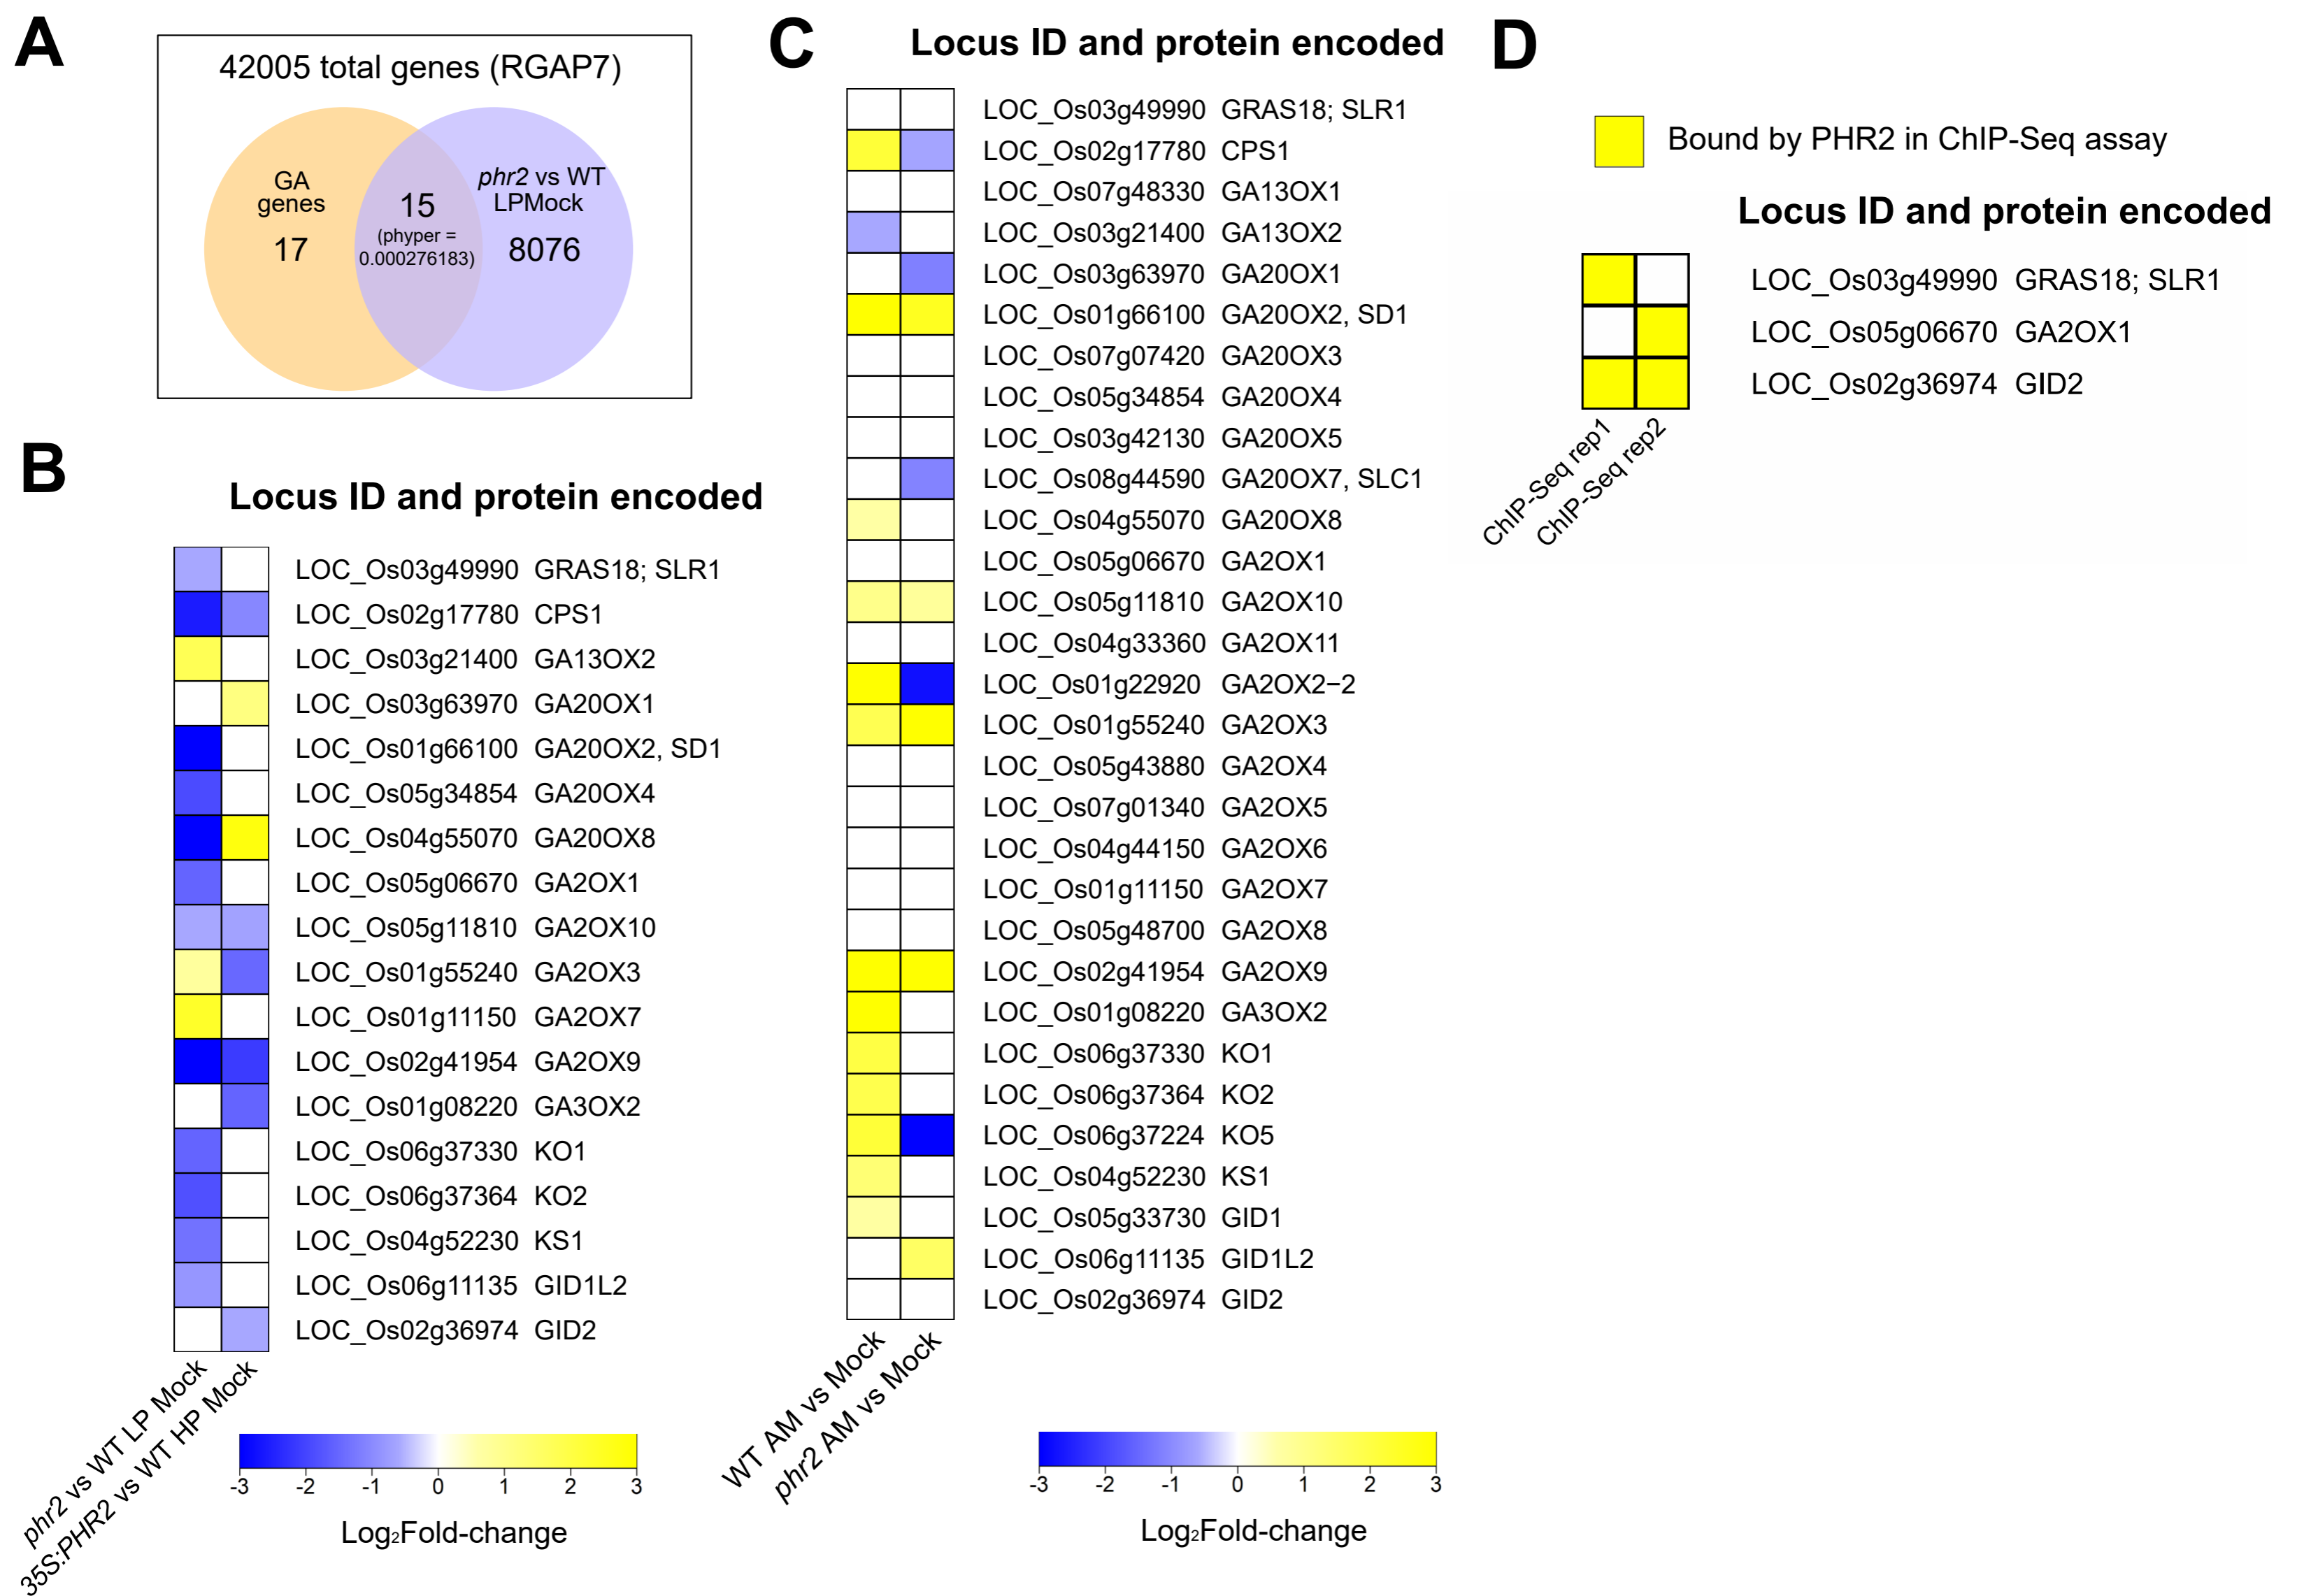

**Supplementary Figure 18. Gibberellin-biosynthesis and -signaling related genes in RNASeq and ChIP-Seq.** (A) Gibberellin (GA)-related genes are enriched in DEGs with reduced expression in non-inoculated *phr2* vs wild type, as shown by a hypergeometric test to assess the statistical significance (phyper). (B) Expression of GA-related genes in non-colonized *phr2* vs wild type roots at LP and 35S:PHR2 vs wild type roots at HP. (C) Comparison of gene expression for GA-related genes in *phr2* and wild type in AM vs Mock roots. (D) GA-related genes directly targeted by PHR2 as determined by ChIP-Seq.

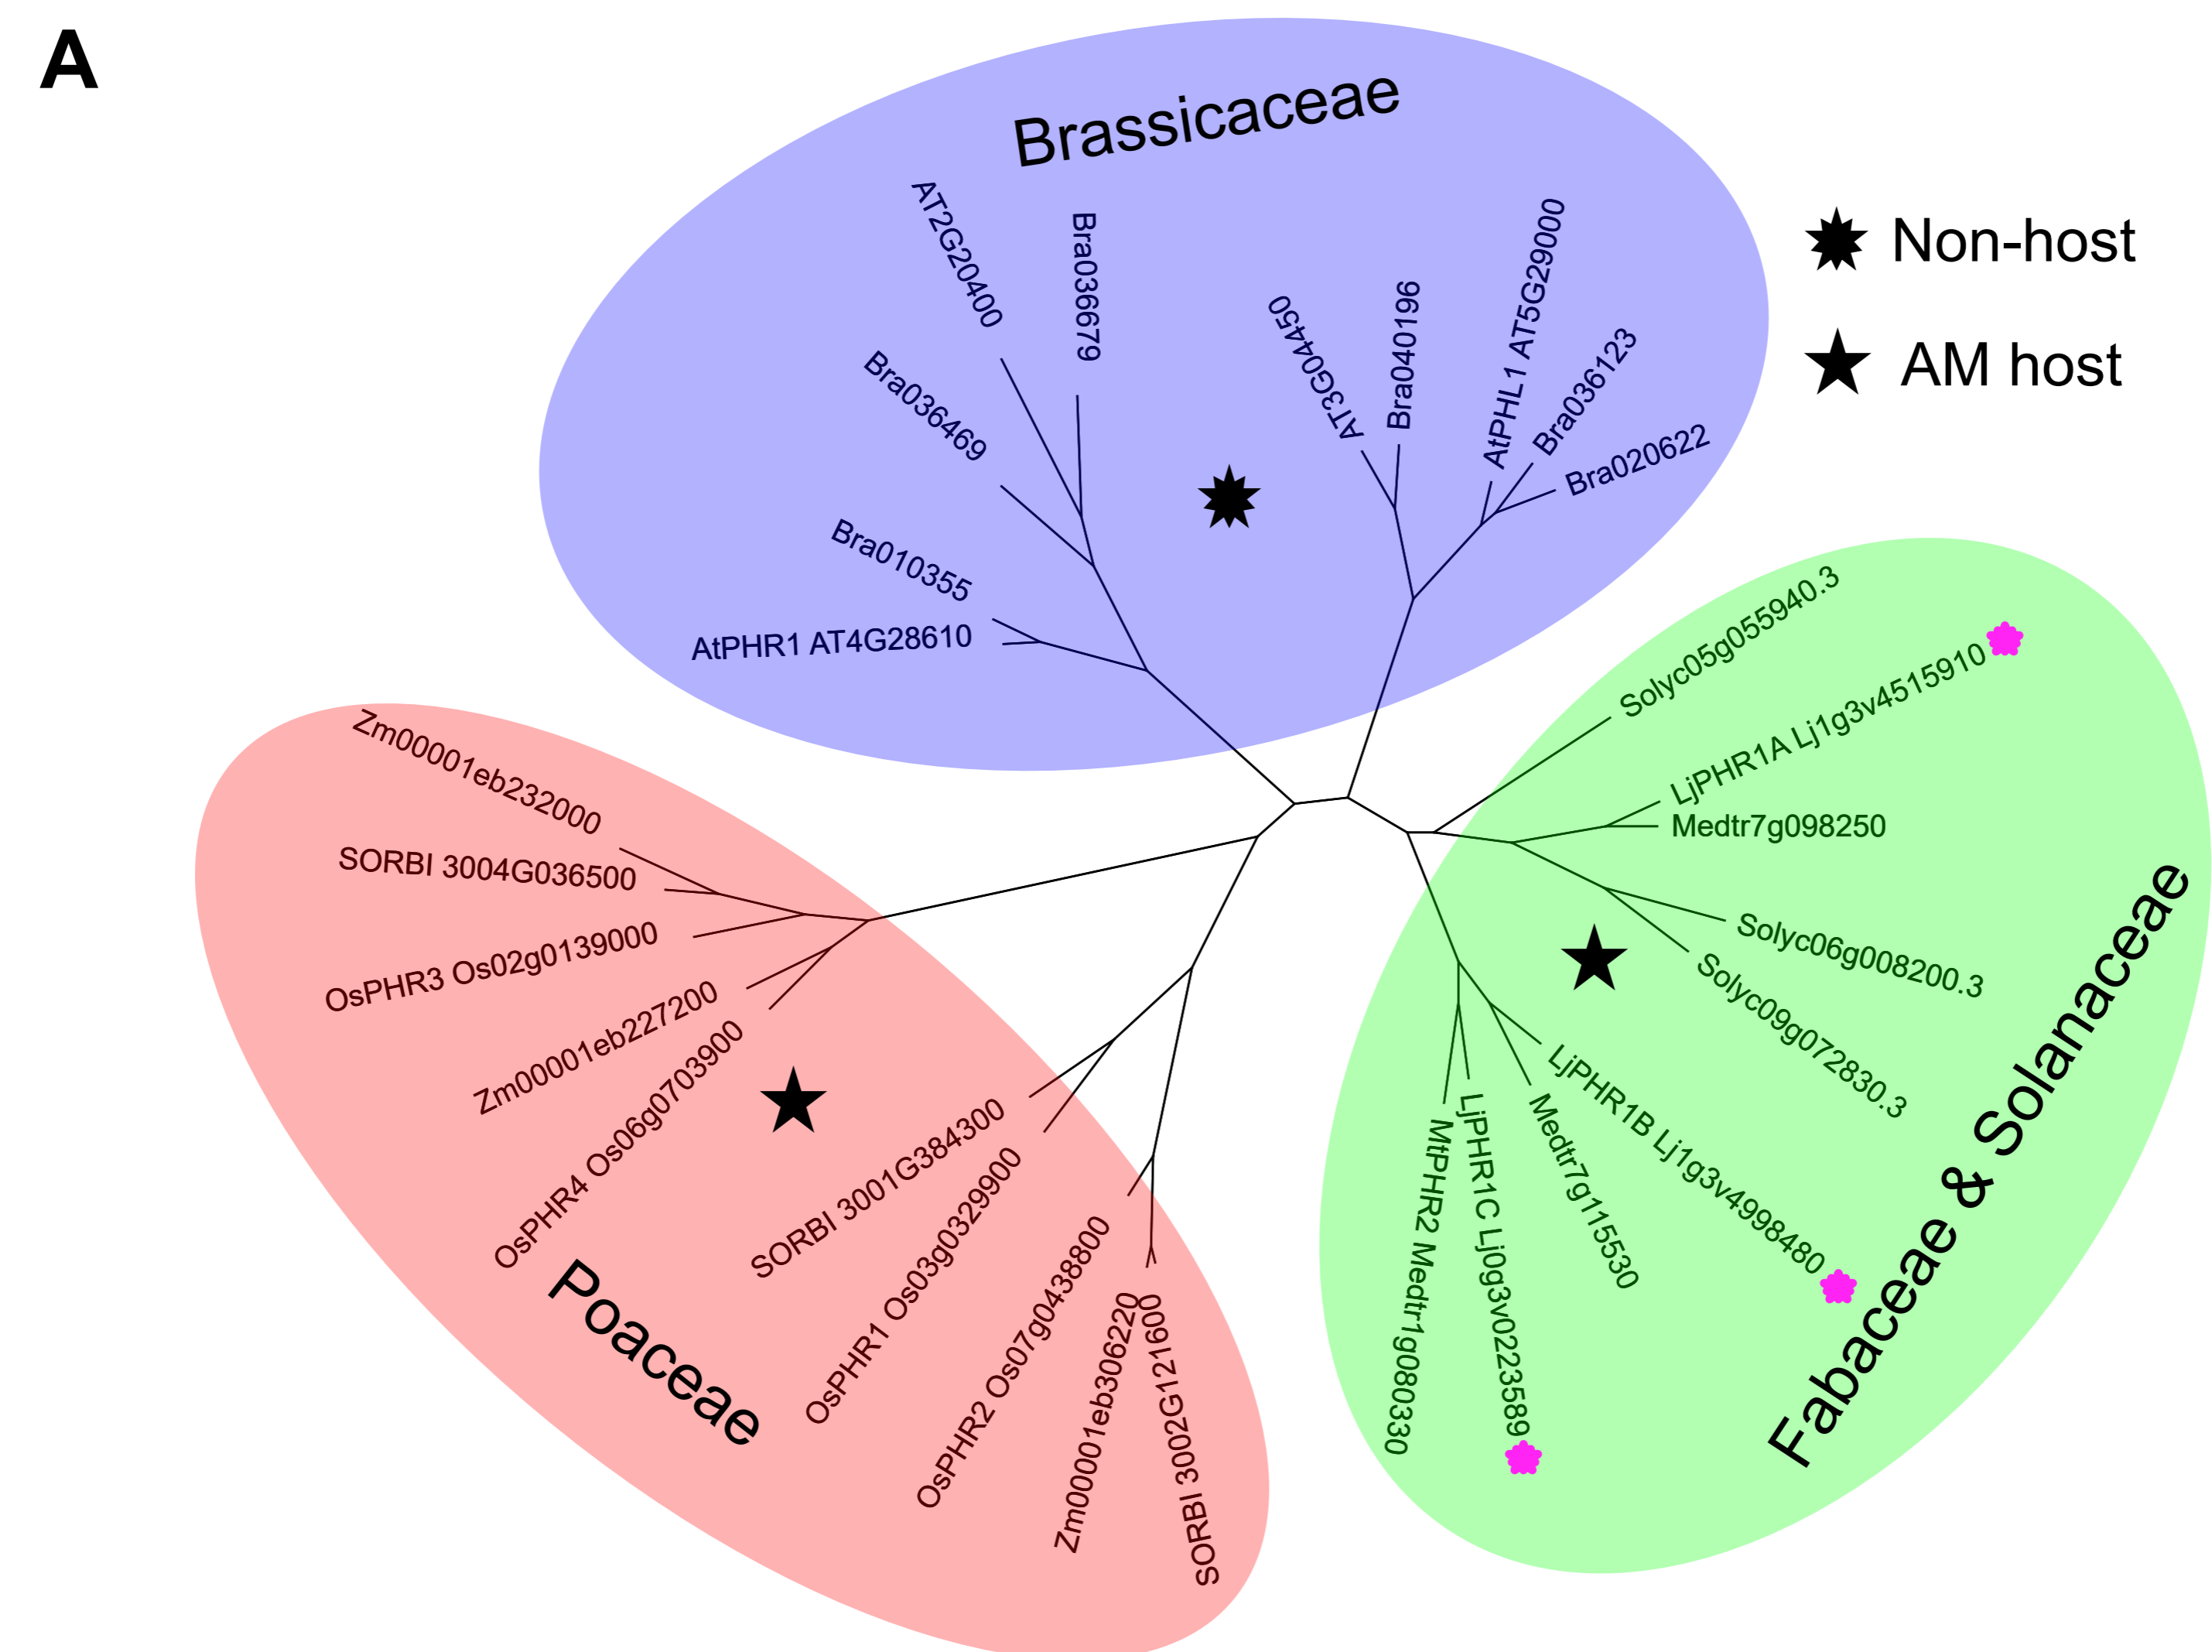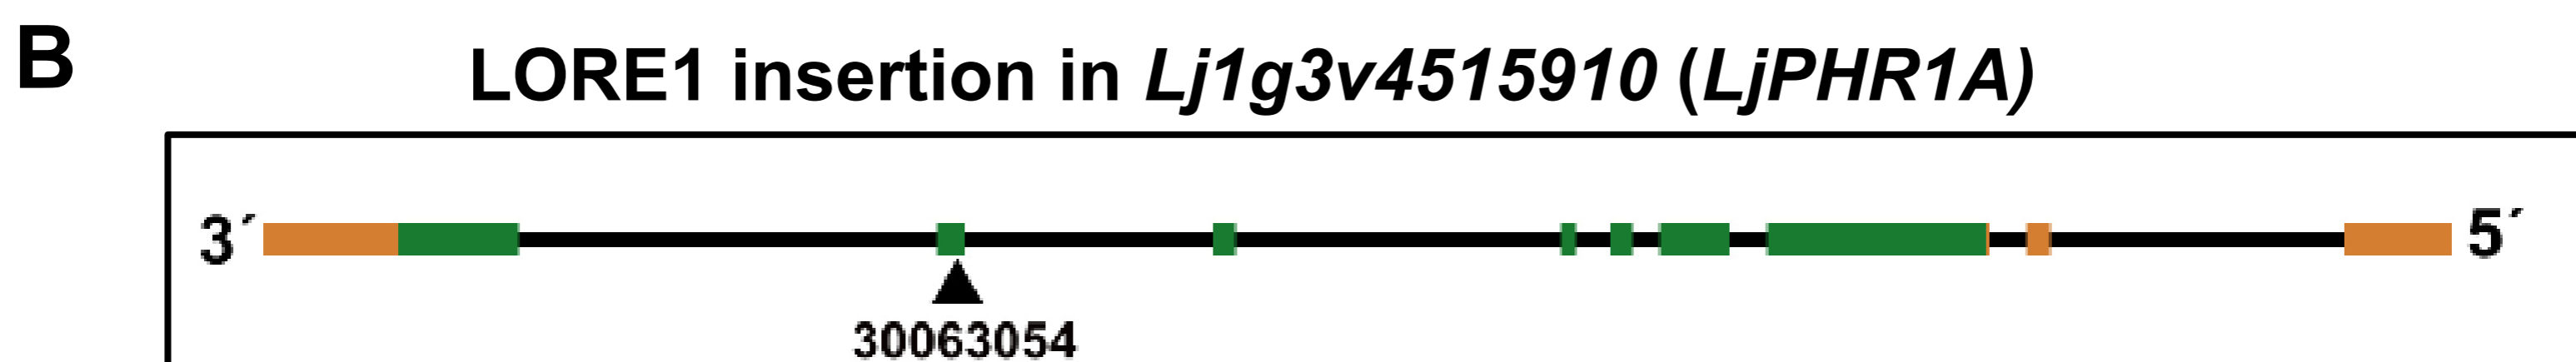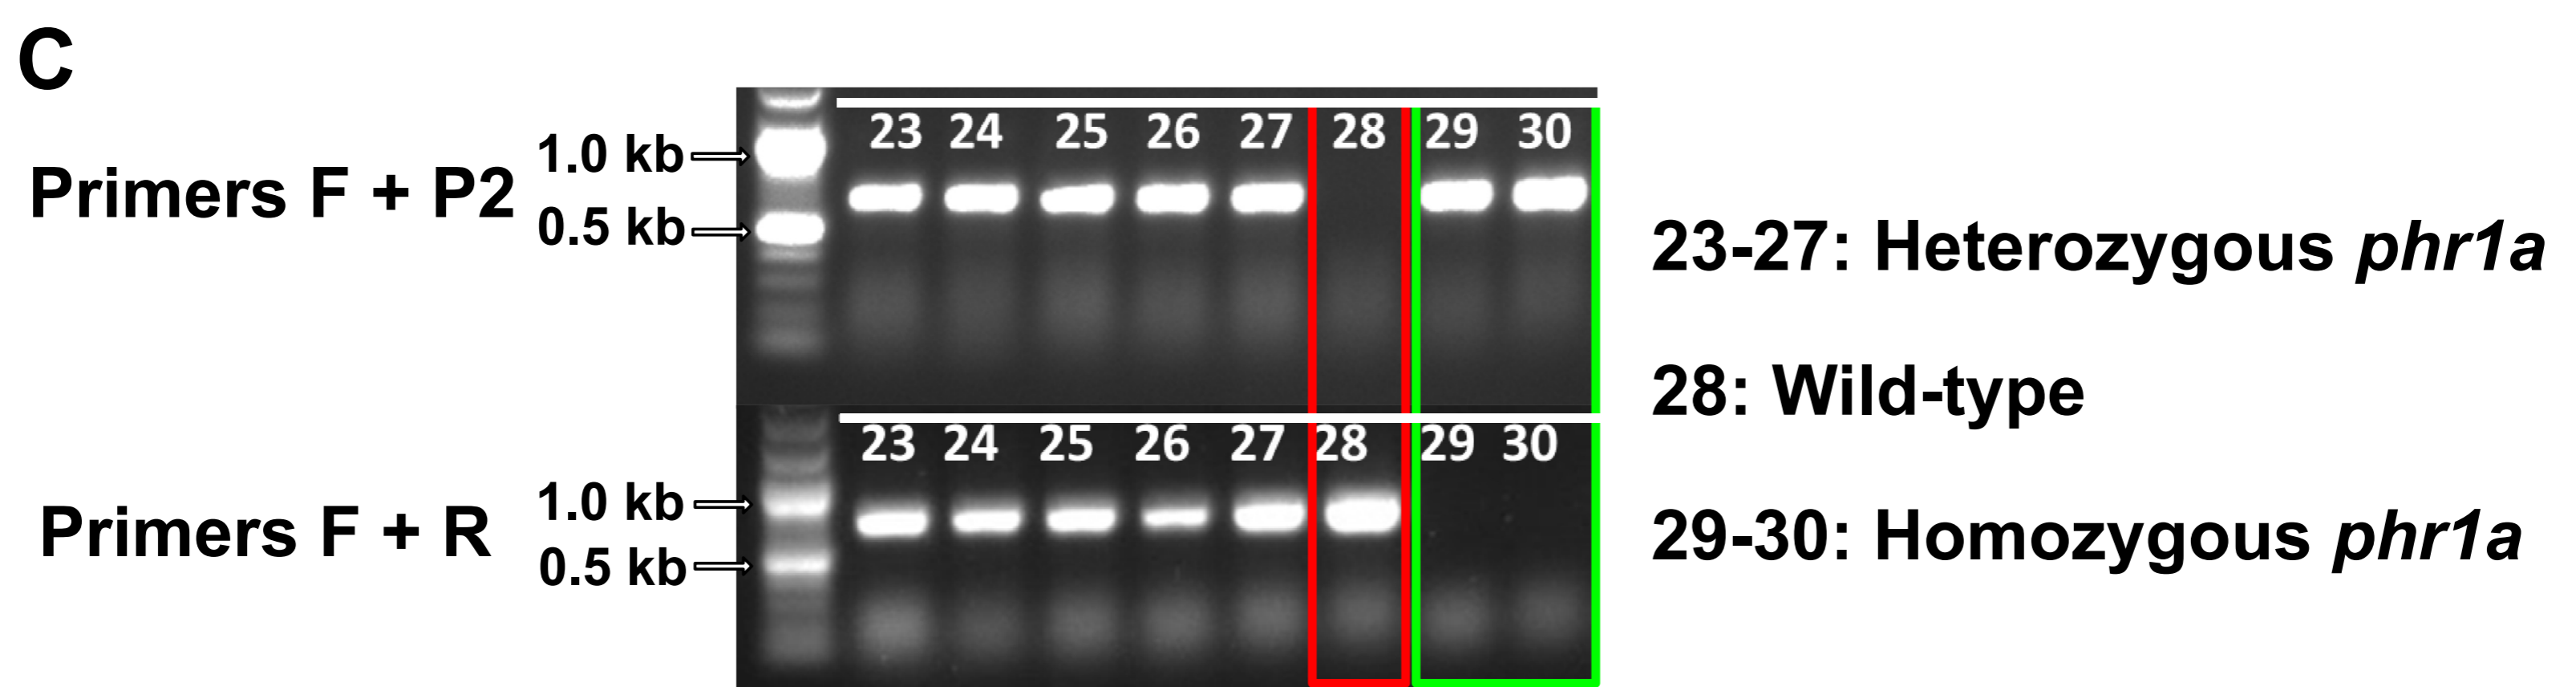

**Supplementary Figure 19. Identification of *Lotus japonicus phr1a* mutant.** (A) Phylogenetic tree of PHR proteins in representative *Brassicaceae*, *Poaceae*, *Fabaceae* and *Solanaceae*. The three *Lotus japonicus* PHR proteins are marked with pink stars. (B) Position of Lotus retrotransposon 1 (LORE1) insertion in *L. japonicus PHR1A*. The number indicates the Plant ID for LORE1 insertion. (C) Genotyping for LORE1 insertion in *phr1a*. The P2 primer sequence is located in the LORE1 insertion while F and R are *PHR1A* specific primers surrounding the insertion. 1 Kb Plus ladder of New England Biolabs (NEB, UK) was used as DNA ladder and 1 and 0.5 kb bands are shown as reference. The genotyping was performed once to select homozygous plants.

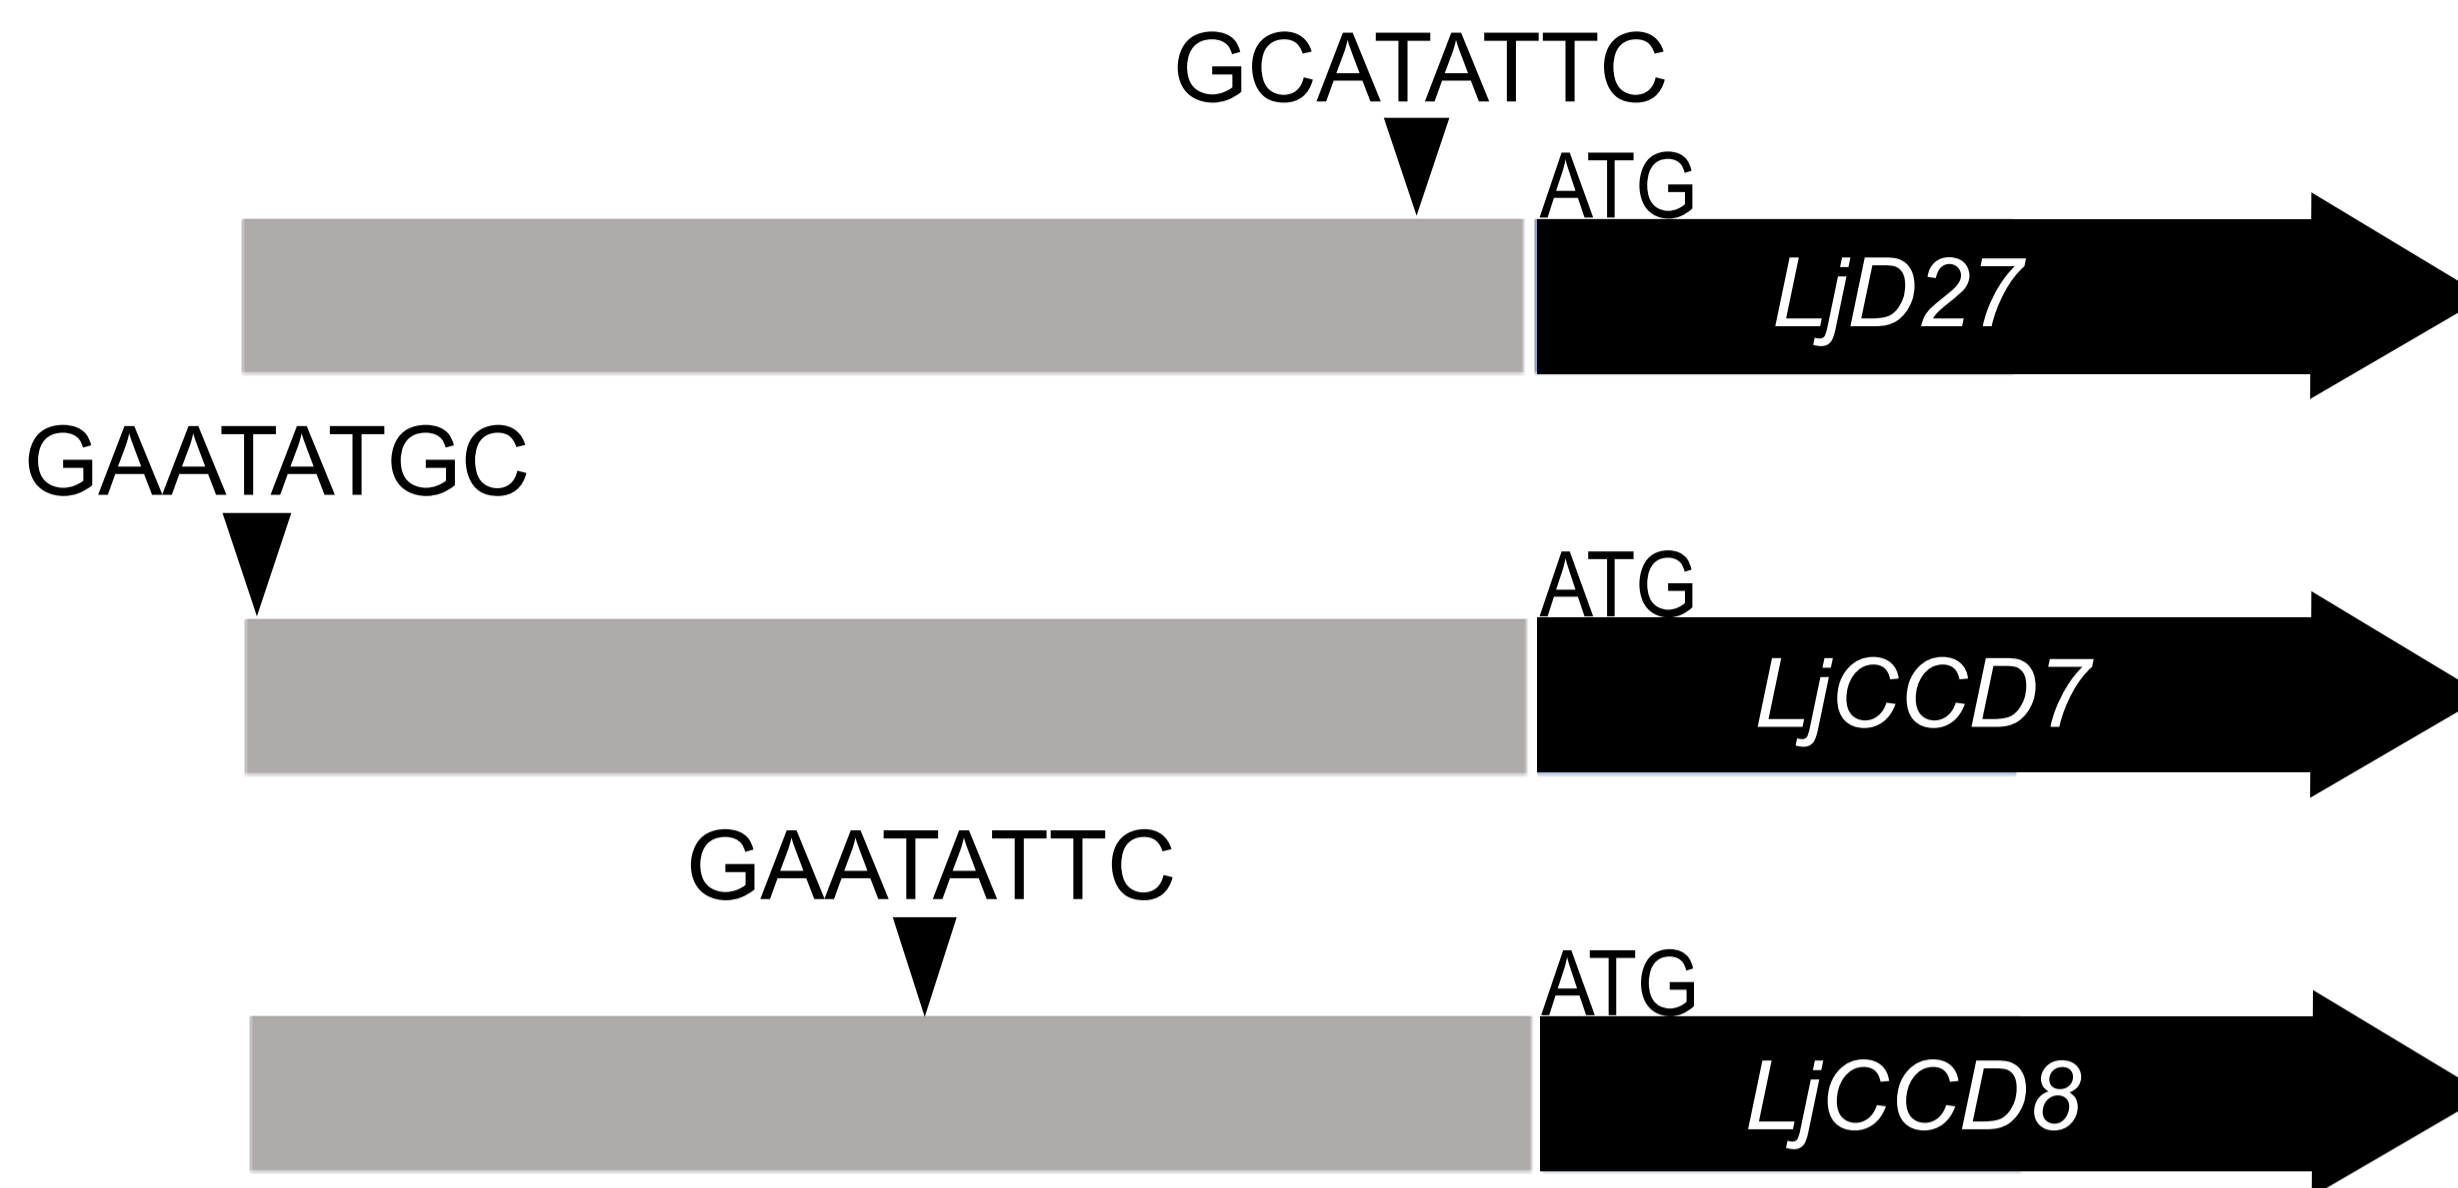

**Supplementary Figure 20. Position of P1BS motifs in the promoters of strigolactone biosynthesis genes in *Lotus japonicus*.** Promoter of length 1600 kb is represented in gray for each gene.

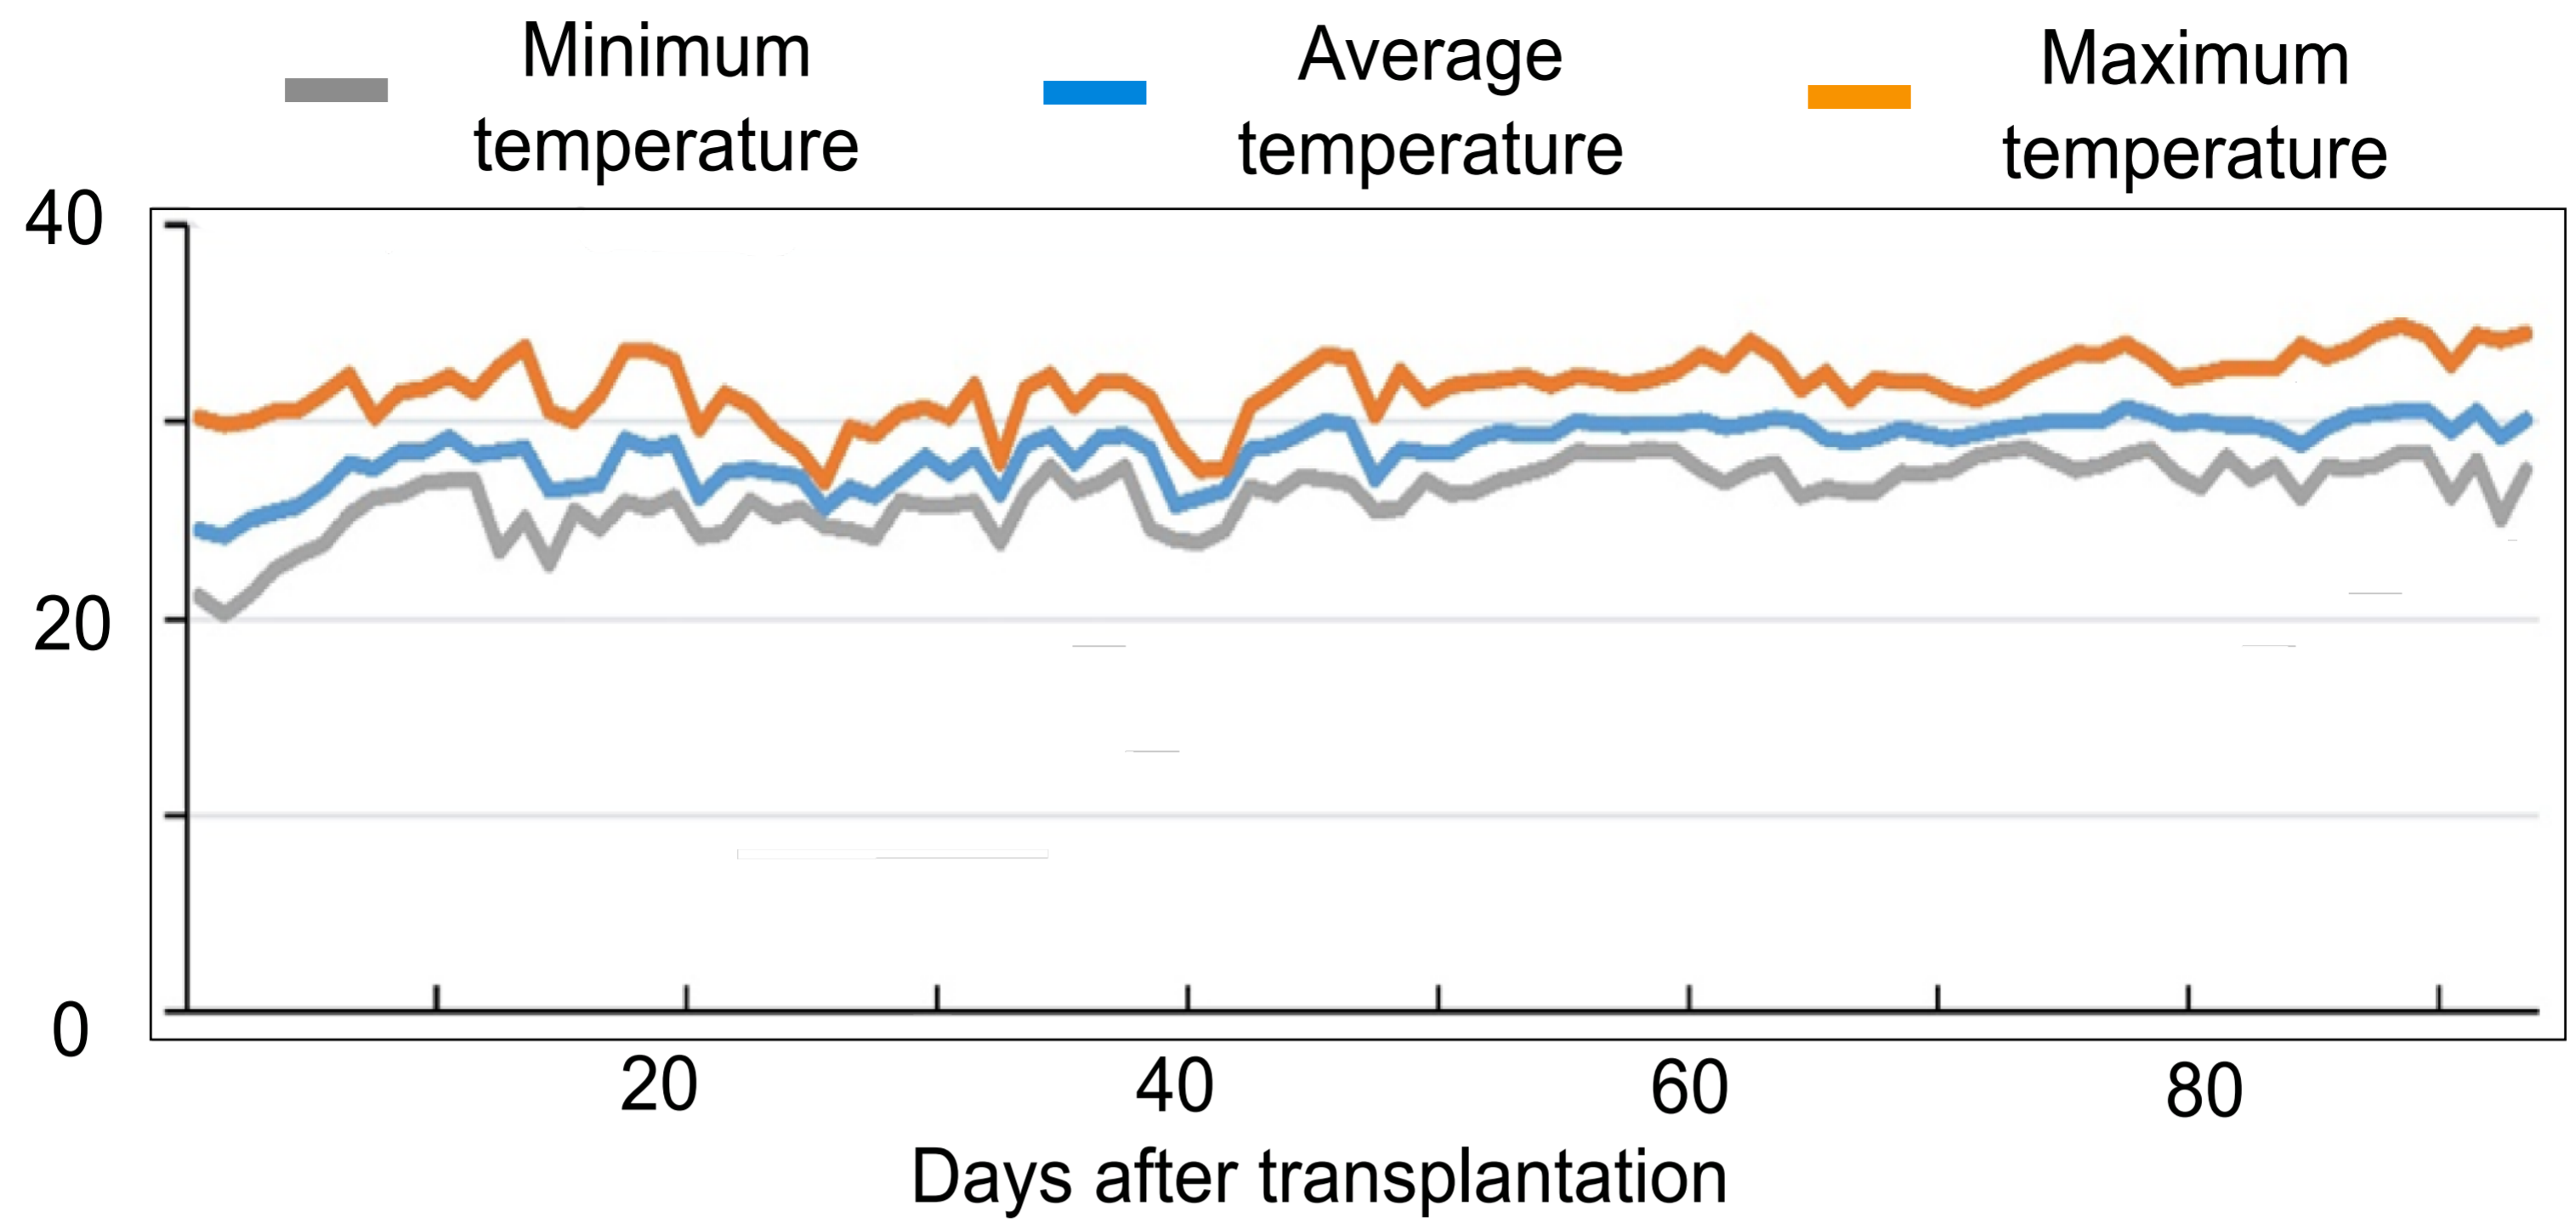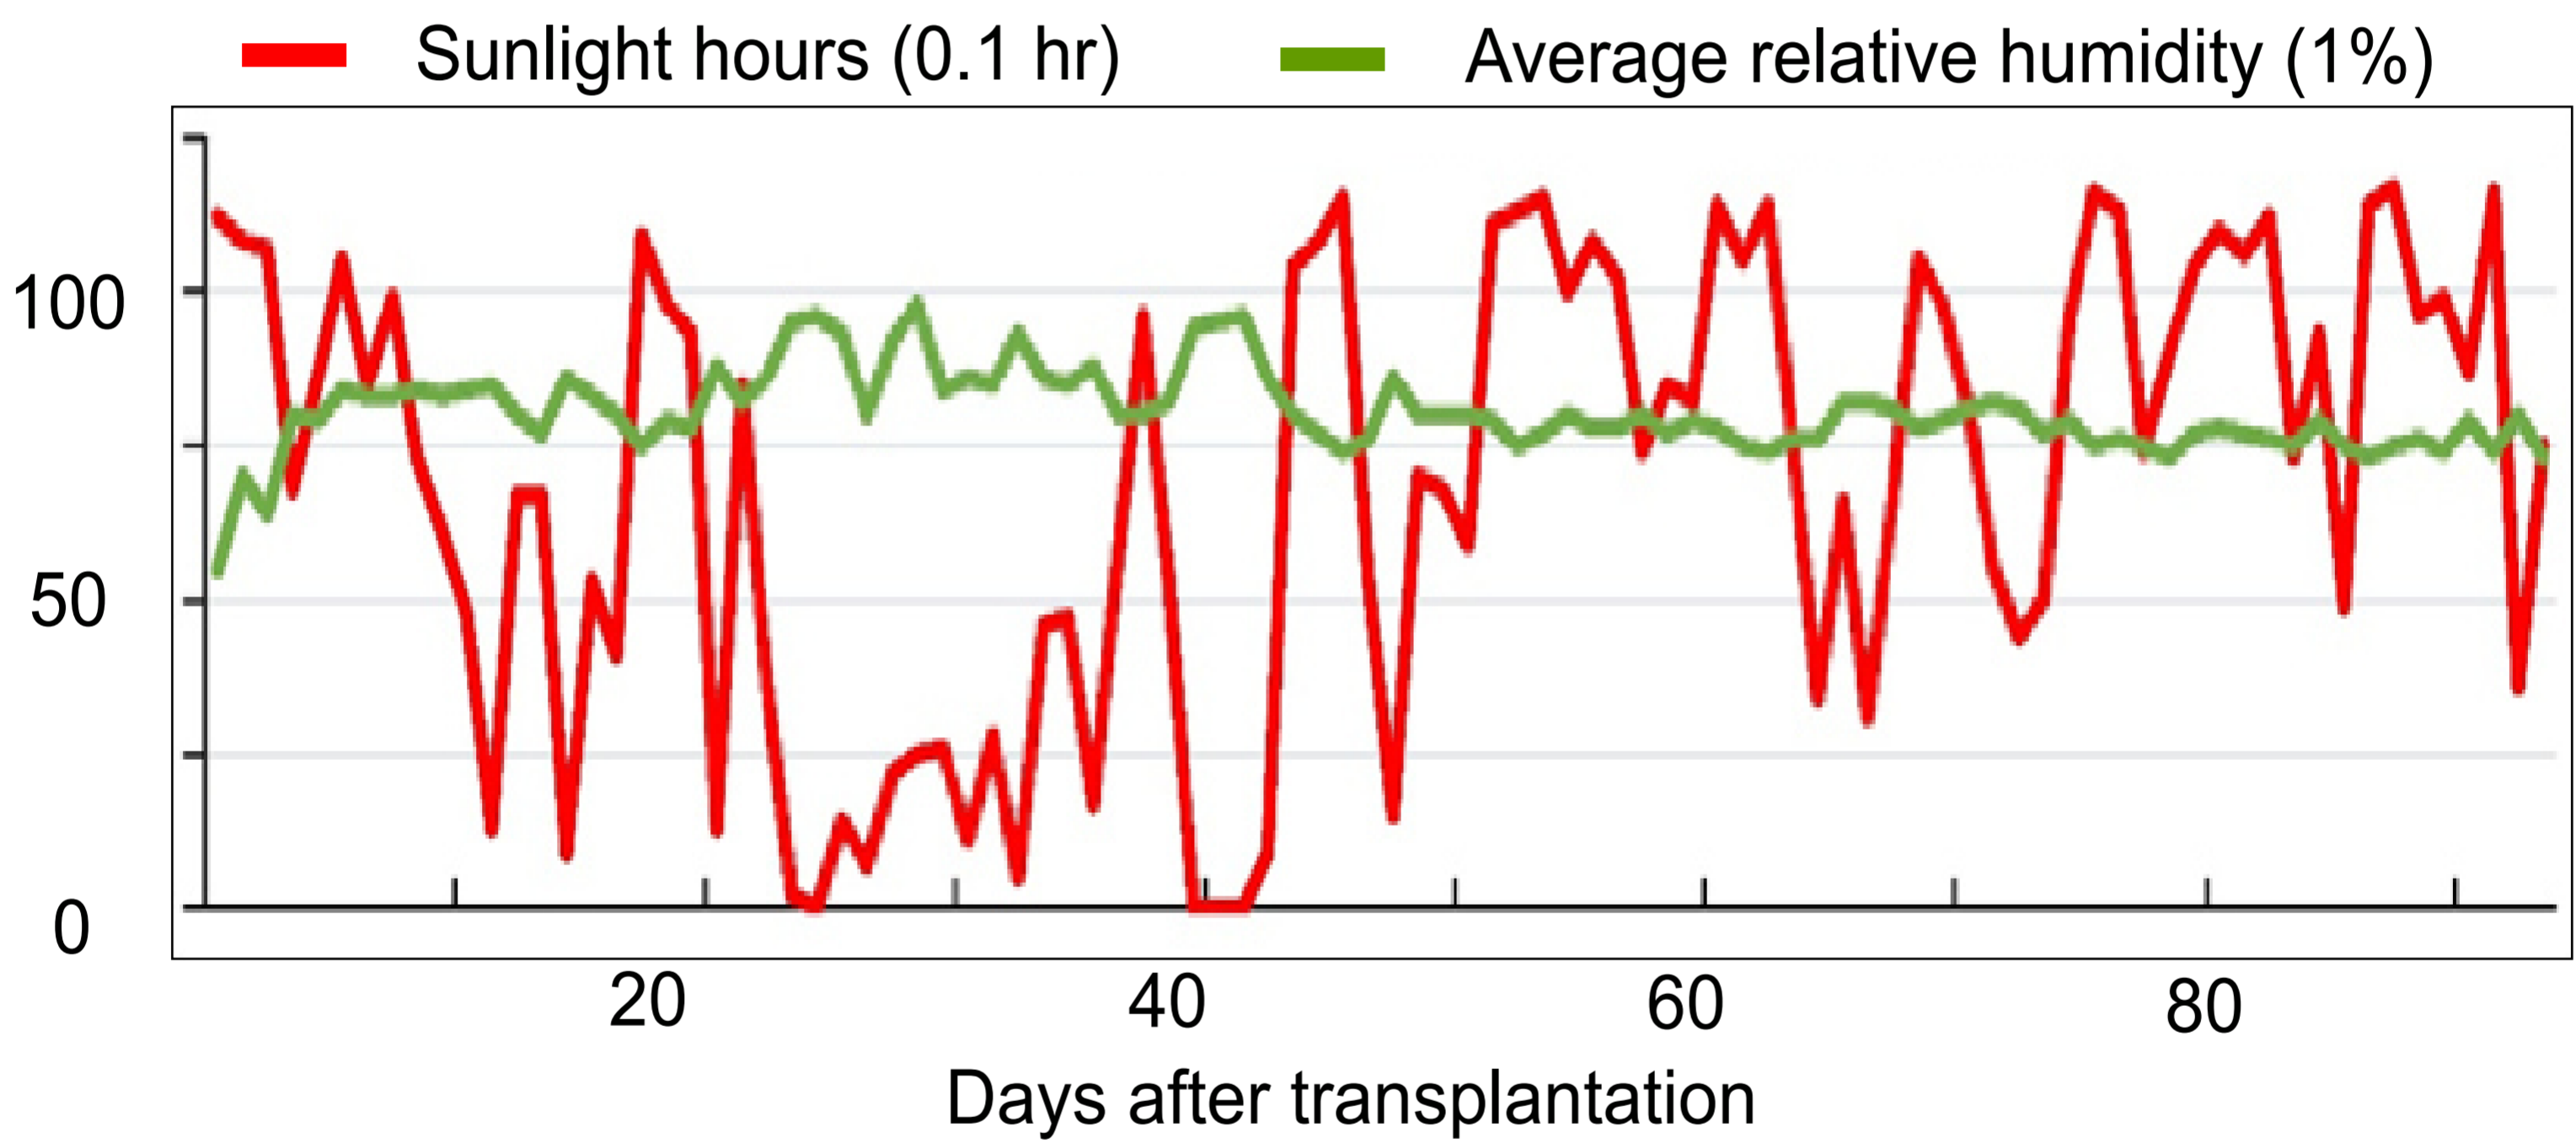

**Supplementary Figure 21. Temperature, sunlight and relative humidity profiles during the greenhouse experiment in field soil.**

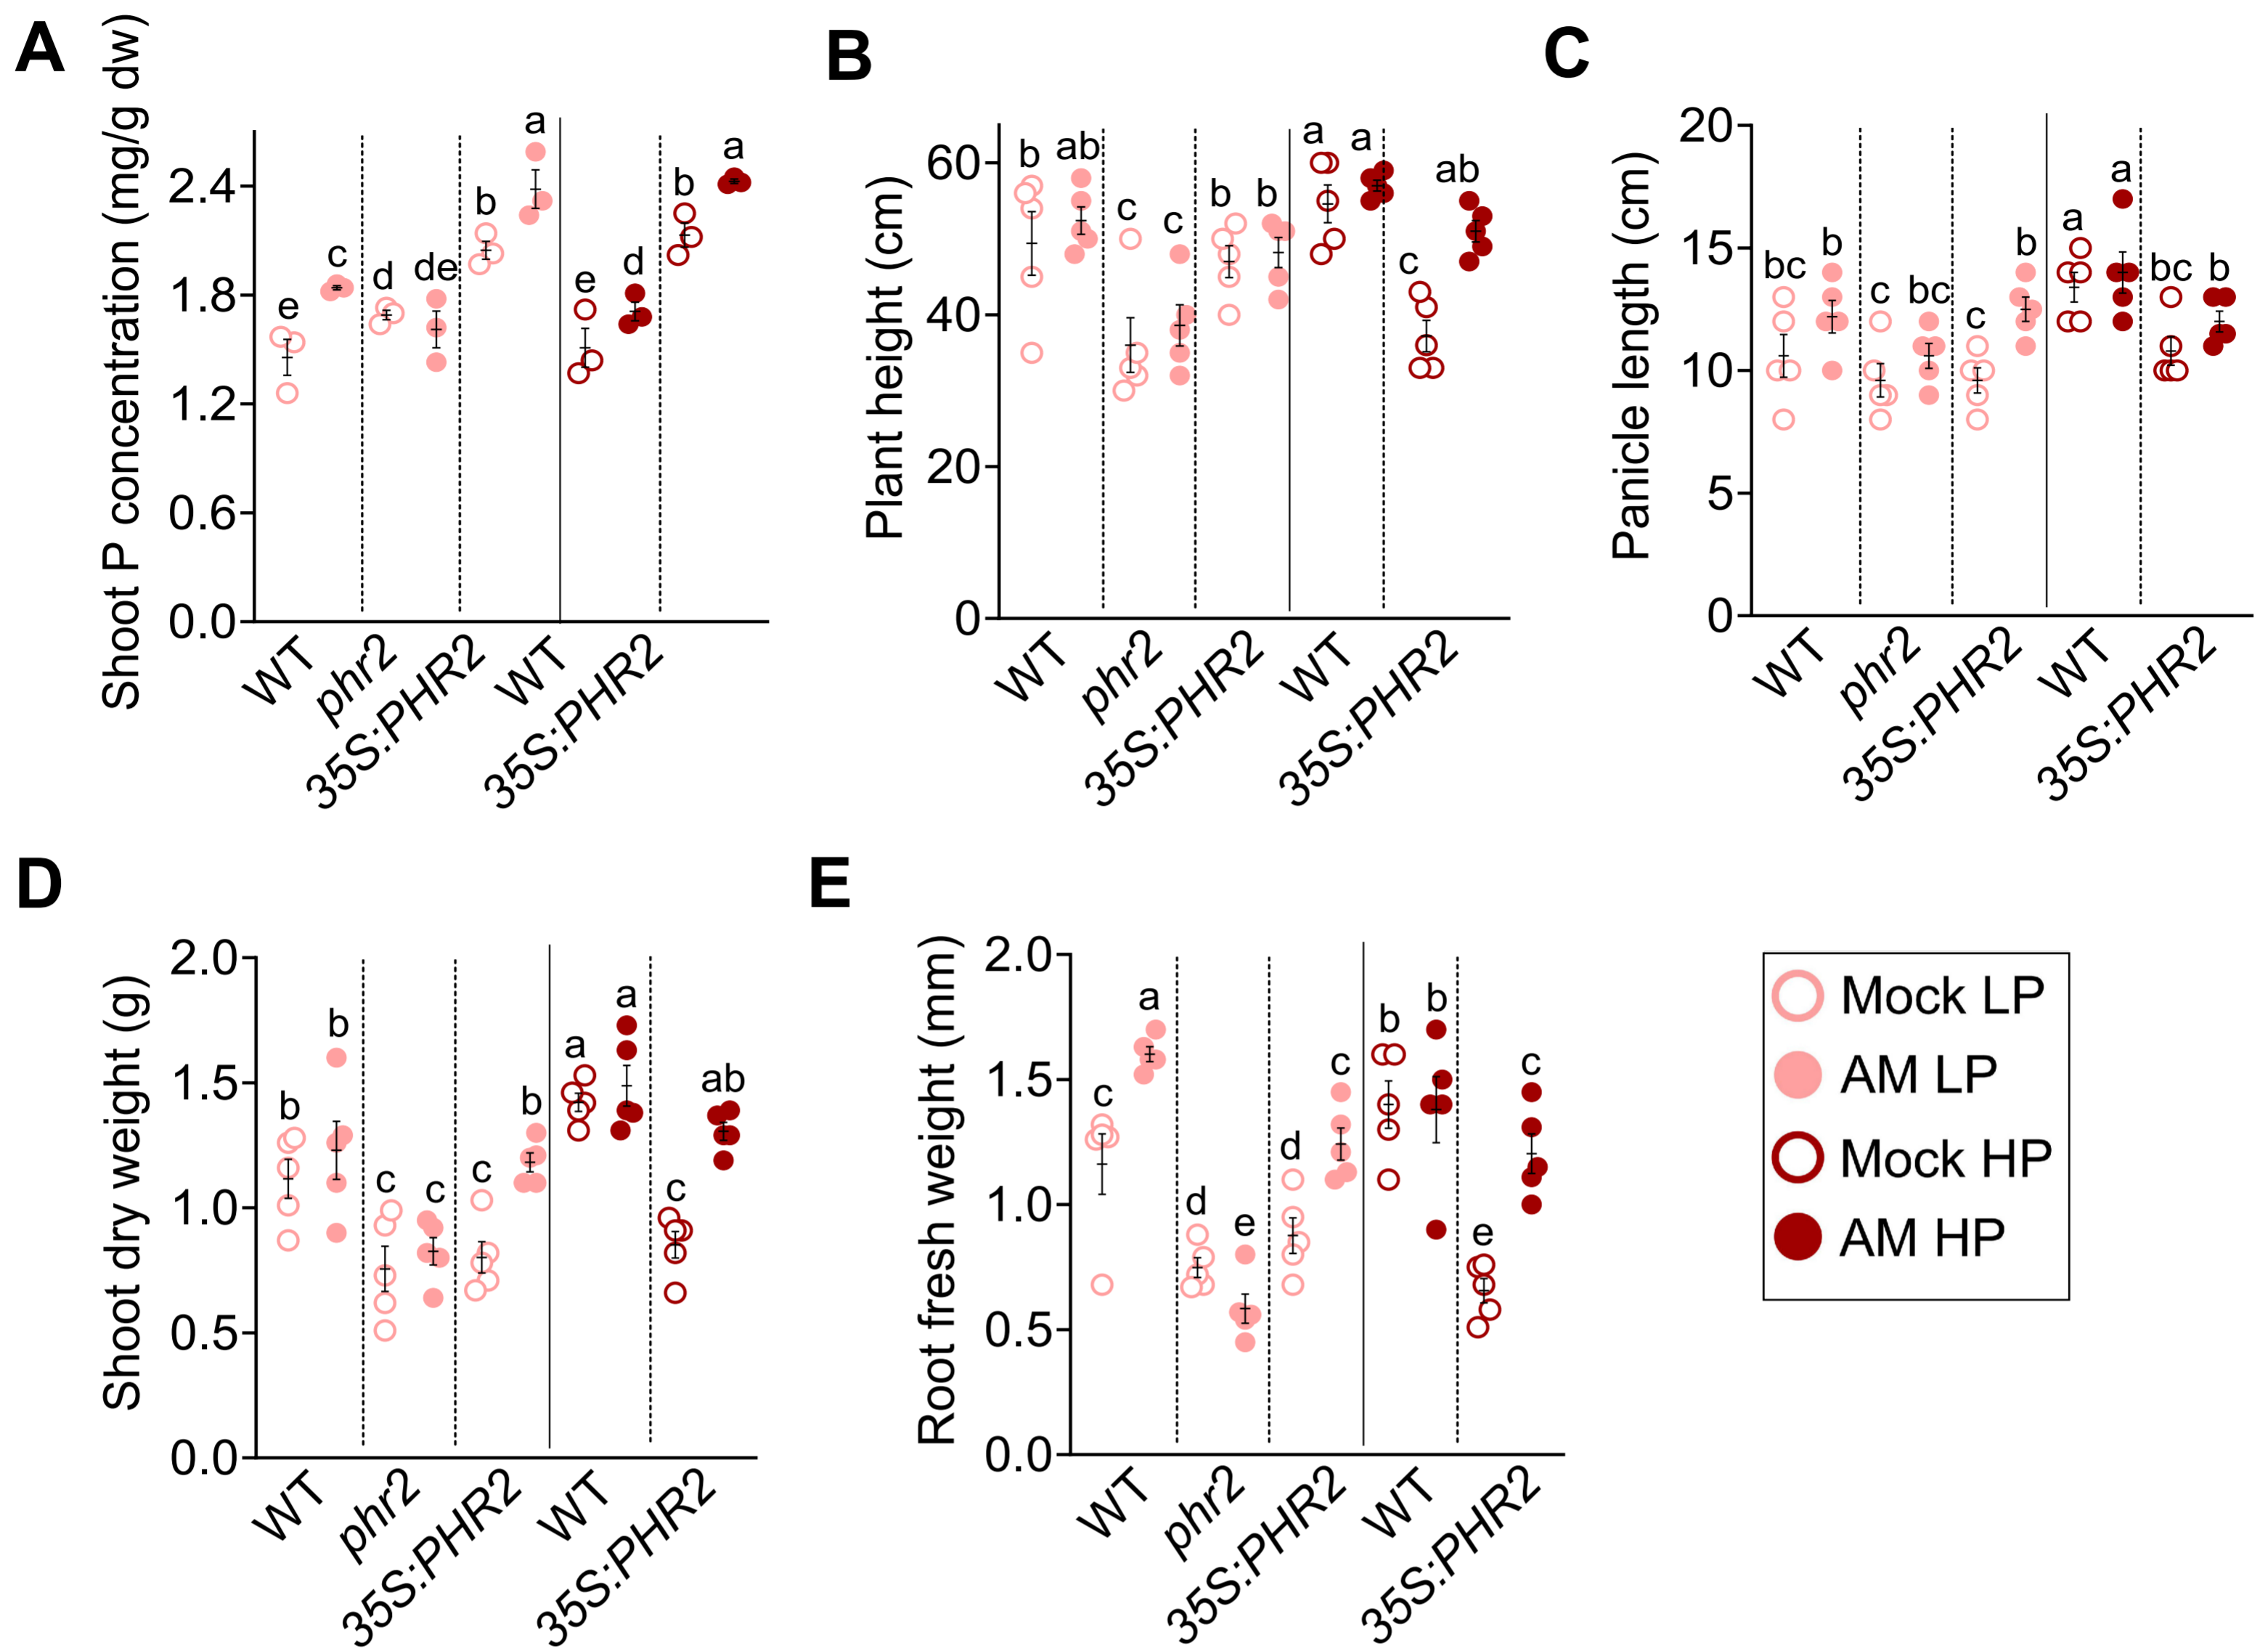

**Supplementary Figure 22. PHR2 affects rice agronomic traits in a field soil.** (A) Shoot phosphorus (P) concentration (mg/g dw), (B) Plant height (cm), (C) panicle length (cm), (D) shoot dry weight (g), (E) root fresh weight (g) in mock (Mock) and *R. irregularis* (AM) inoculated plants of wild type, *phr2* and *35S:PHR2* lines grown at LP (unfertilized) and of wild type and *35S:PHR2* lines grown at HP (fertilized with superphosphate fertilizer,  $P_2O_5$ ). Traits were quantified for plants harvested at 110 days post transplanting into soil and inoculation. Statistics: Individual data-points and mean  $\pm$  SE are shown. N=3-5 biologically independent samples; Brown-Forsythe and Welch's One-Way ANOVA test with Games-Howell's multiple comparison test was carried out. Different letters indicate statistical differences.

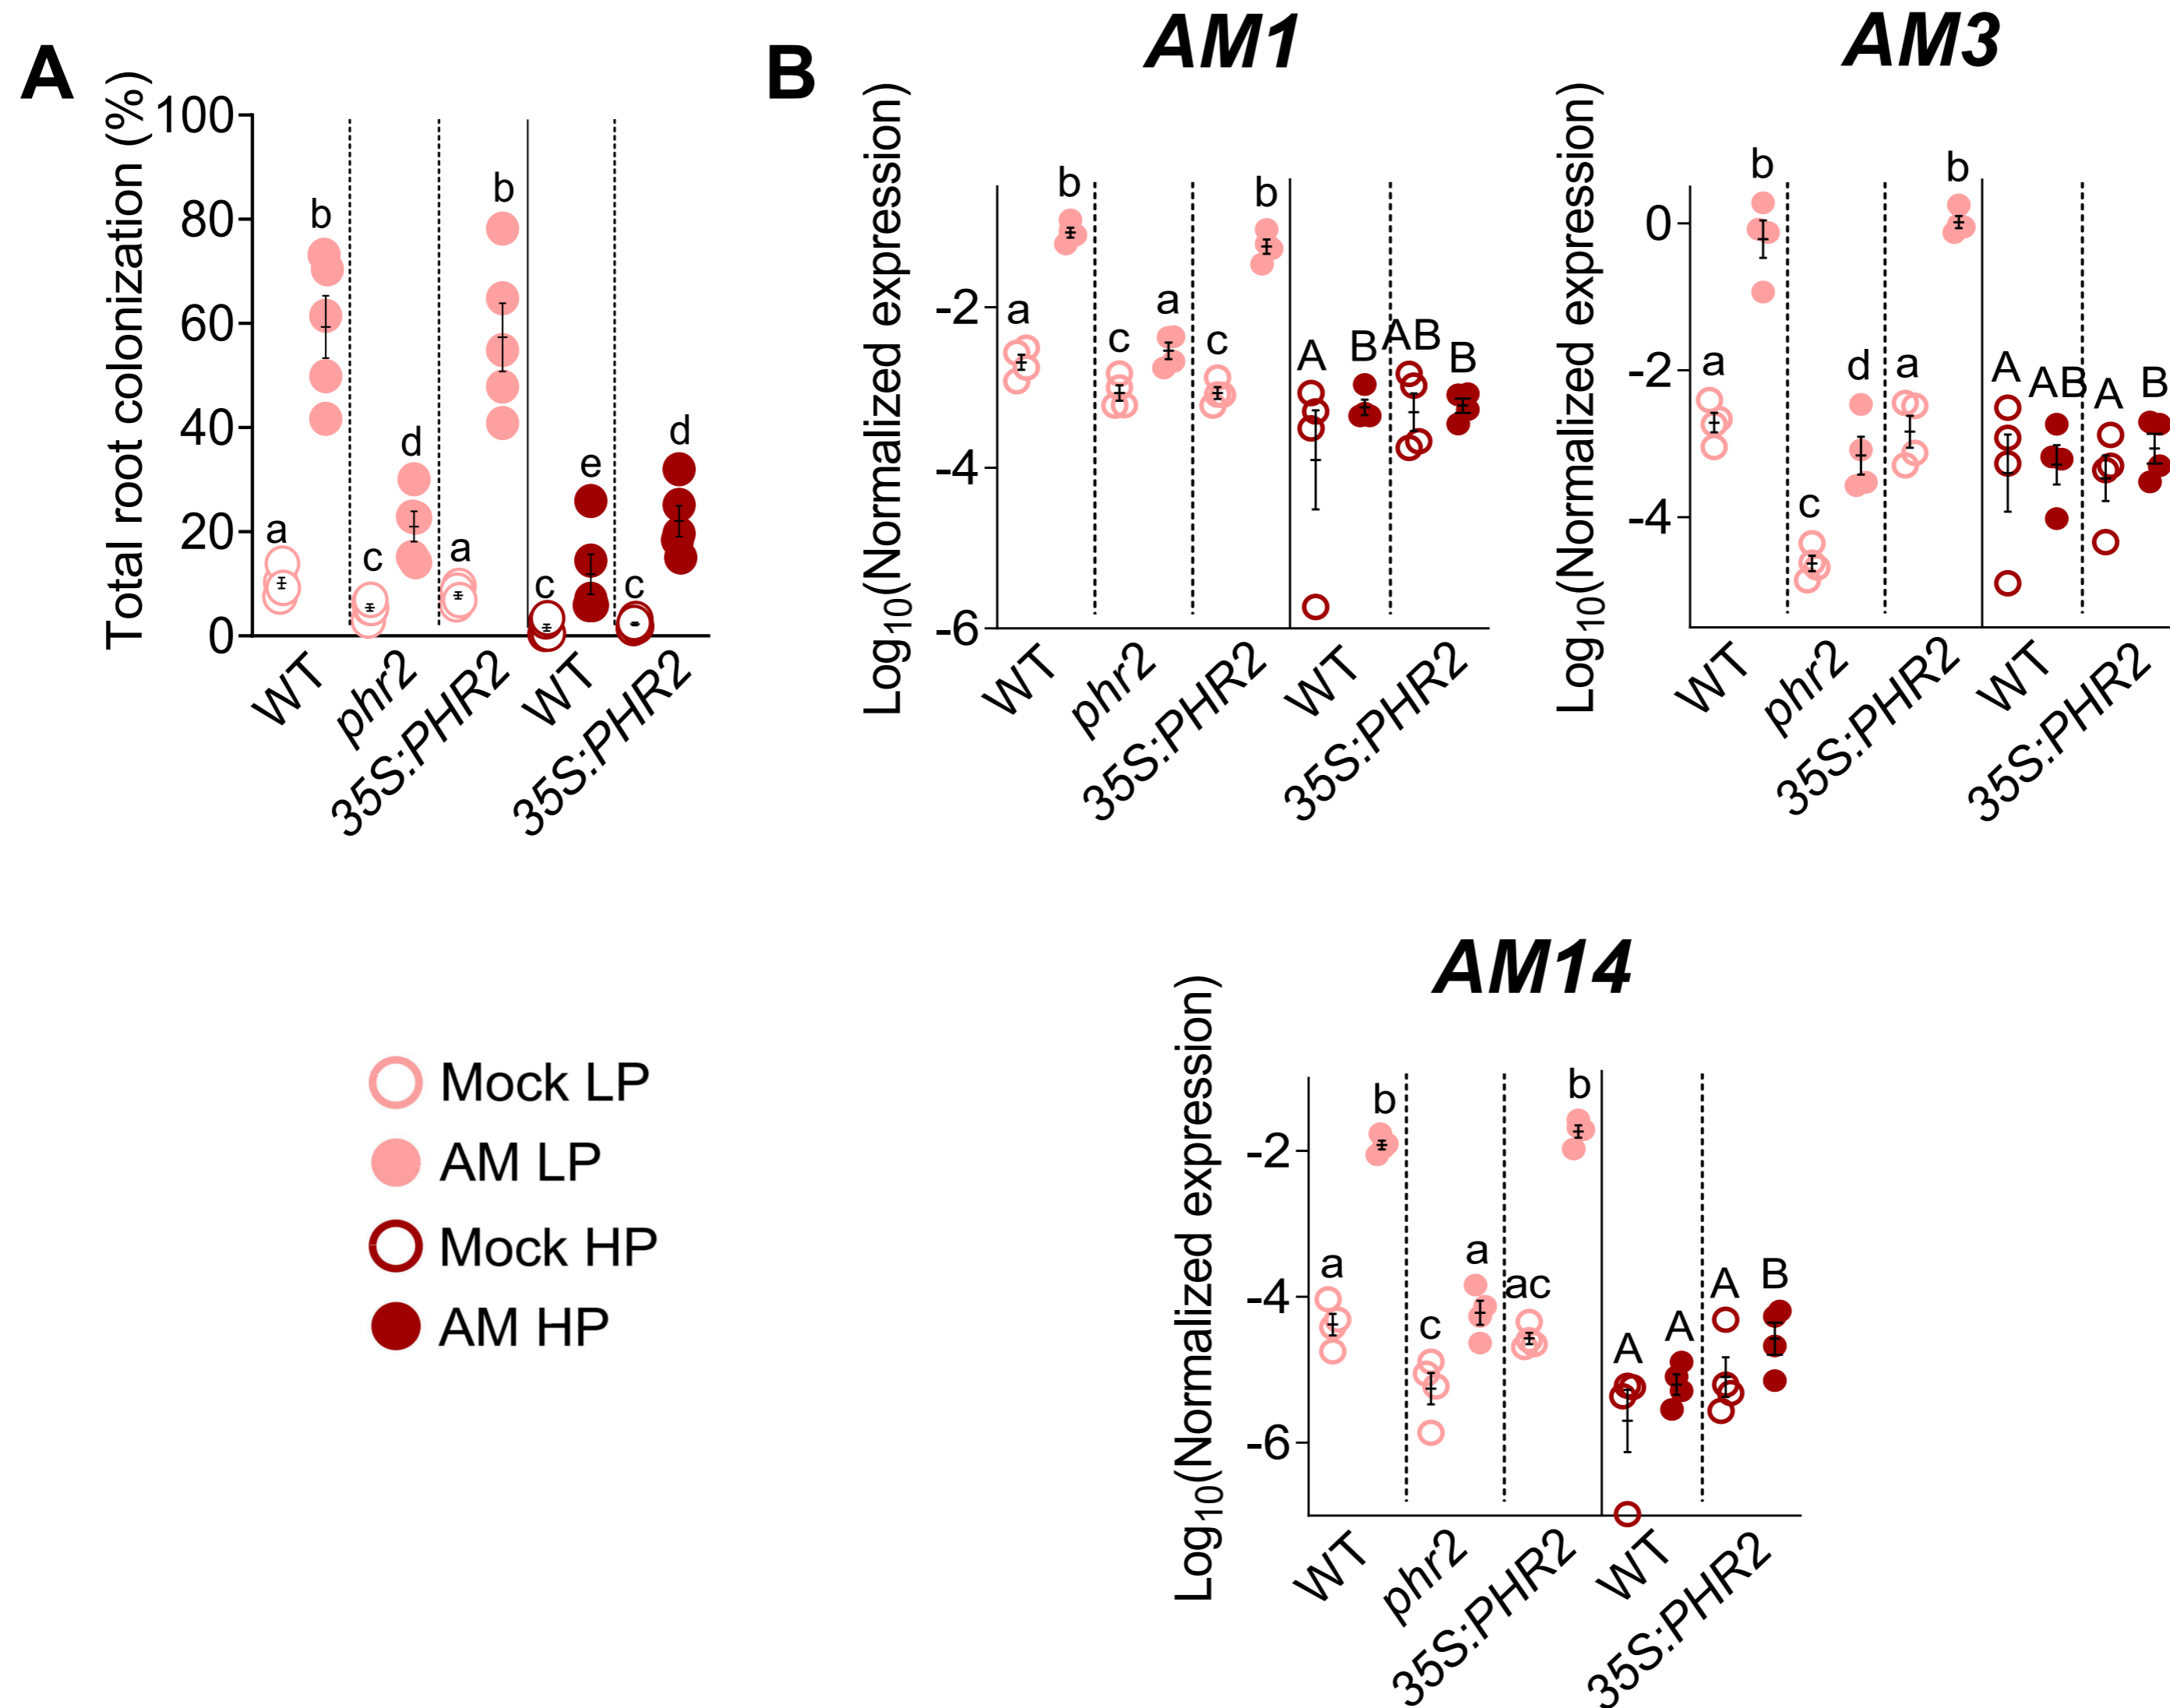

**Supplementary Figure 23. Root colonization and RT-qPCR-based transcript accumulation of AM-marker genes in roots of plants grown in field soil. (A)** Total root colonization (%) in *R. irregularis*-inoculated plants of wild type and *phr2* and 35S:PHR2 at LP (unfertilized) and in wild type and 35S:PHR2 lines at HP (fertilized with superphosphate fertilizer, P<sub>2</sub>O<sub>5</sub>). Roots were harvested at 110 days post transplantation into field soil and inoculation. Letters indicate statistical differences between genotypes, treatment and phosphate levels. Statistics: N=5; Kruskal-Wallis test with Dunn's posthoc comparison. **(B)** Relative transcript accumulation in mock inoculated (Mock) and *R. irregularis* colonized (AM) roots of the indicated genotypes grown in field soil and fertilized with LP or HP (as described in A). Expression values of indicated genes were normalized to the geometric mean of the expression of two housekeeping genes, *UBIQUITIN* and *CYCLOPHILIN*. Letters indicate statistical differences between genotypes and treatments within each phosphate level. Statistics: Individual data-points and mean ± SE are shown. (A) N=5 independent root systems; Brown-Forsythe and Welch's One-Way ANOVA test with Games-Howell's multiple comparisons test between genotypes and treatments. Different letters indicate statistical differences between genotypes and treatments. (B) N=3-4 biologically independent samples. Brown-Forsythe and Welch's One-Way ANOVA test with Games-Howell's multiple comparisons test was carried out for each phosphate level separately. Different letters indicate statistical differences between genotypes and treatments.



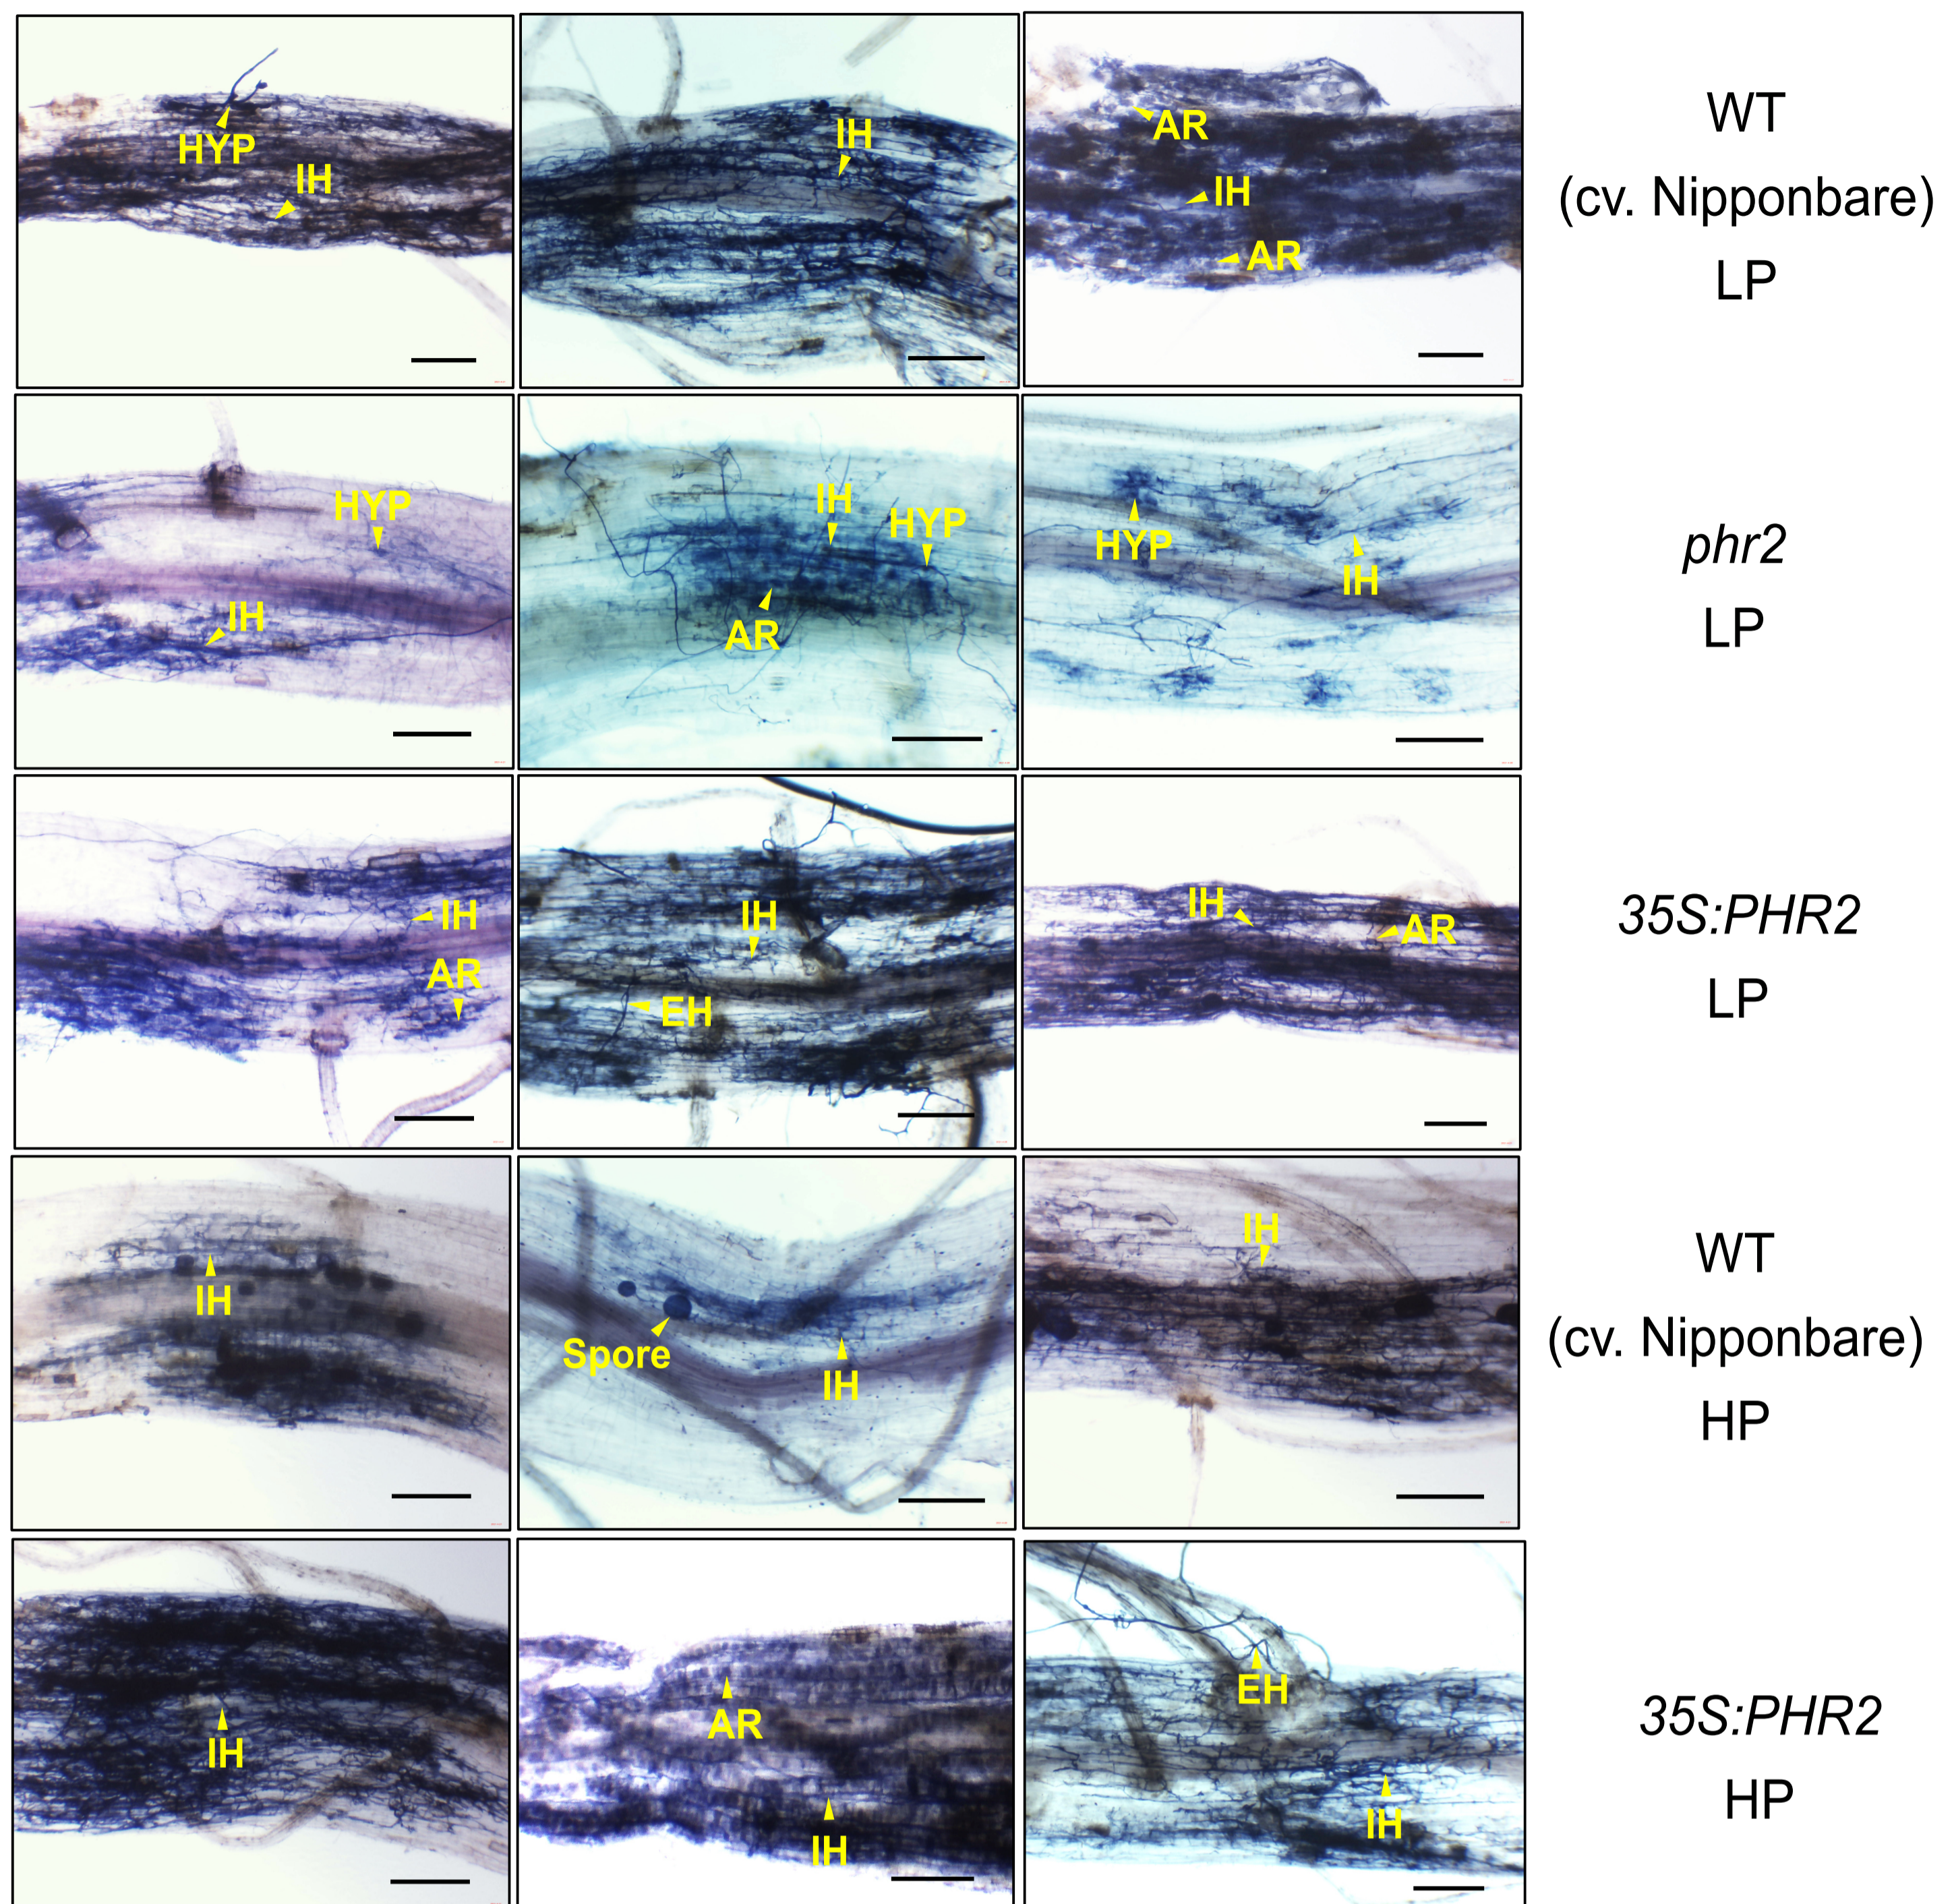

**Supplementary Figure 24. Colonization of WT, *phr2* and 35S:PHR2.** Brightfield images of roots stained with acid-ink to visualize colonization of wild type (cv. Nipponbare), *phr2* and 35S:PHR2 roots by *R. irregularis* at 110 days post transplantation and grown at LP (unfertilized) or HP (fertilized with superphosphate fertilizer, P<sub>2</sub>O<sub>5</sub>) in field soil. Scale bars, 200 μm. Abbreviations: EH, extraradical hypha; HYP: hyphopodium; IH, intraradical hypha; AR, arbuscule, VE, vesicle. The phenotype was observed in root systems of 5 independent plants.

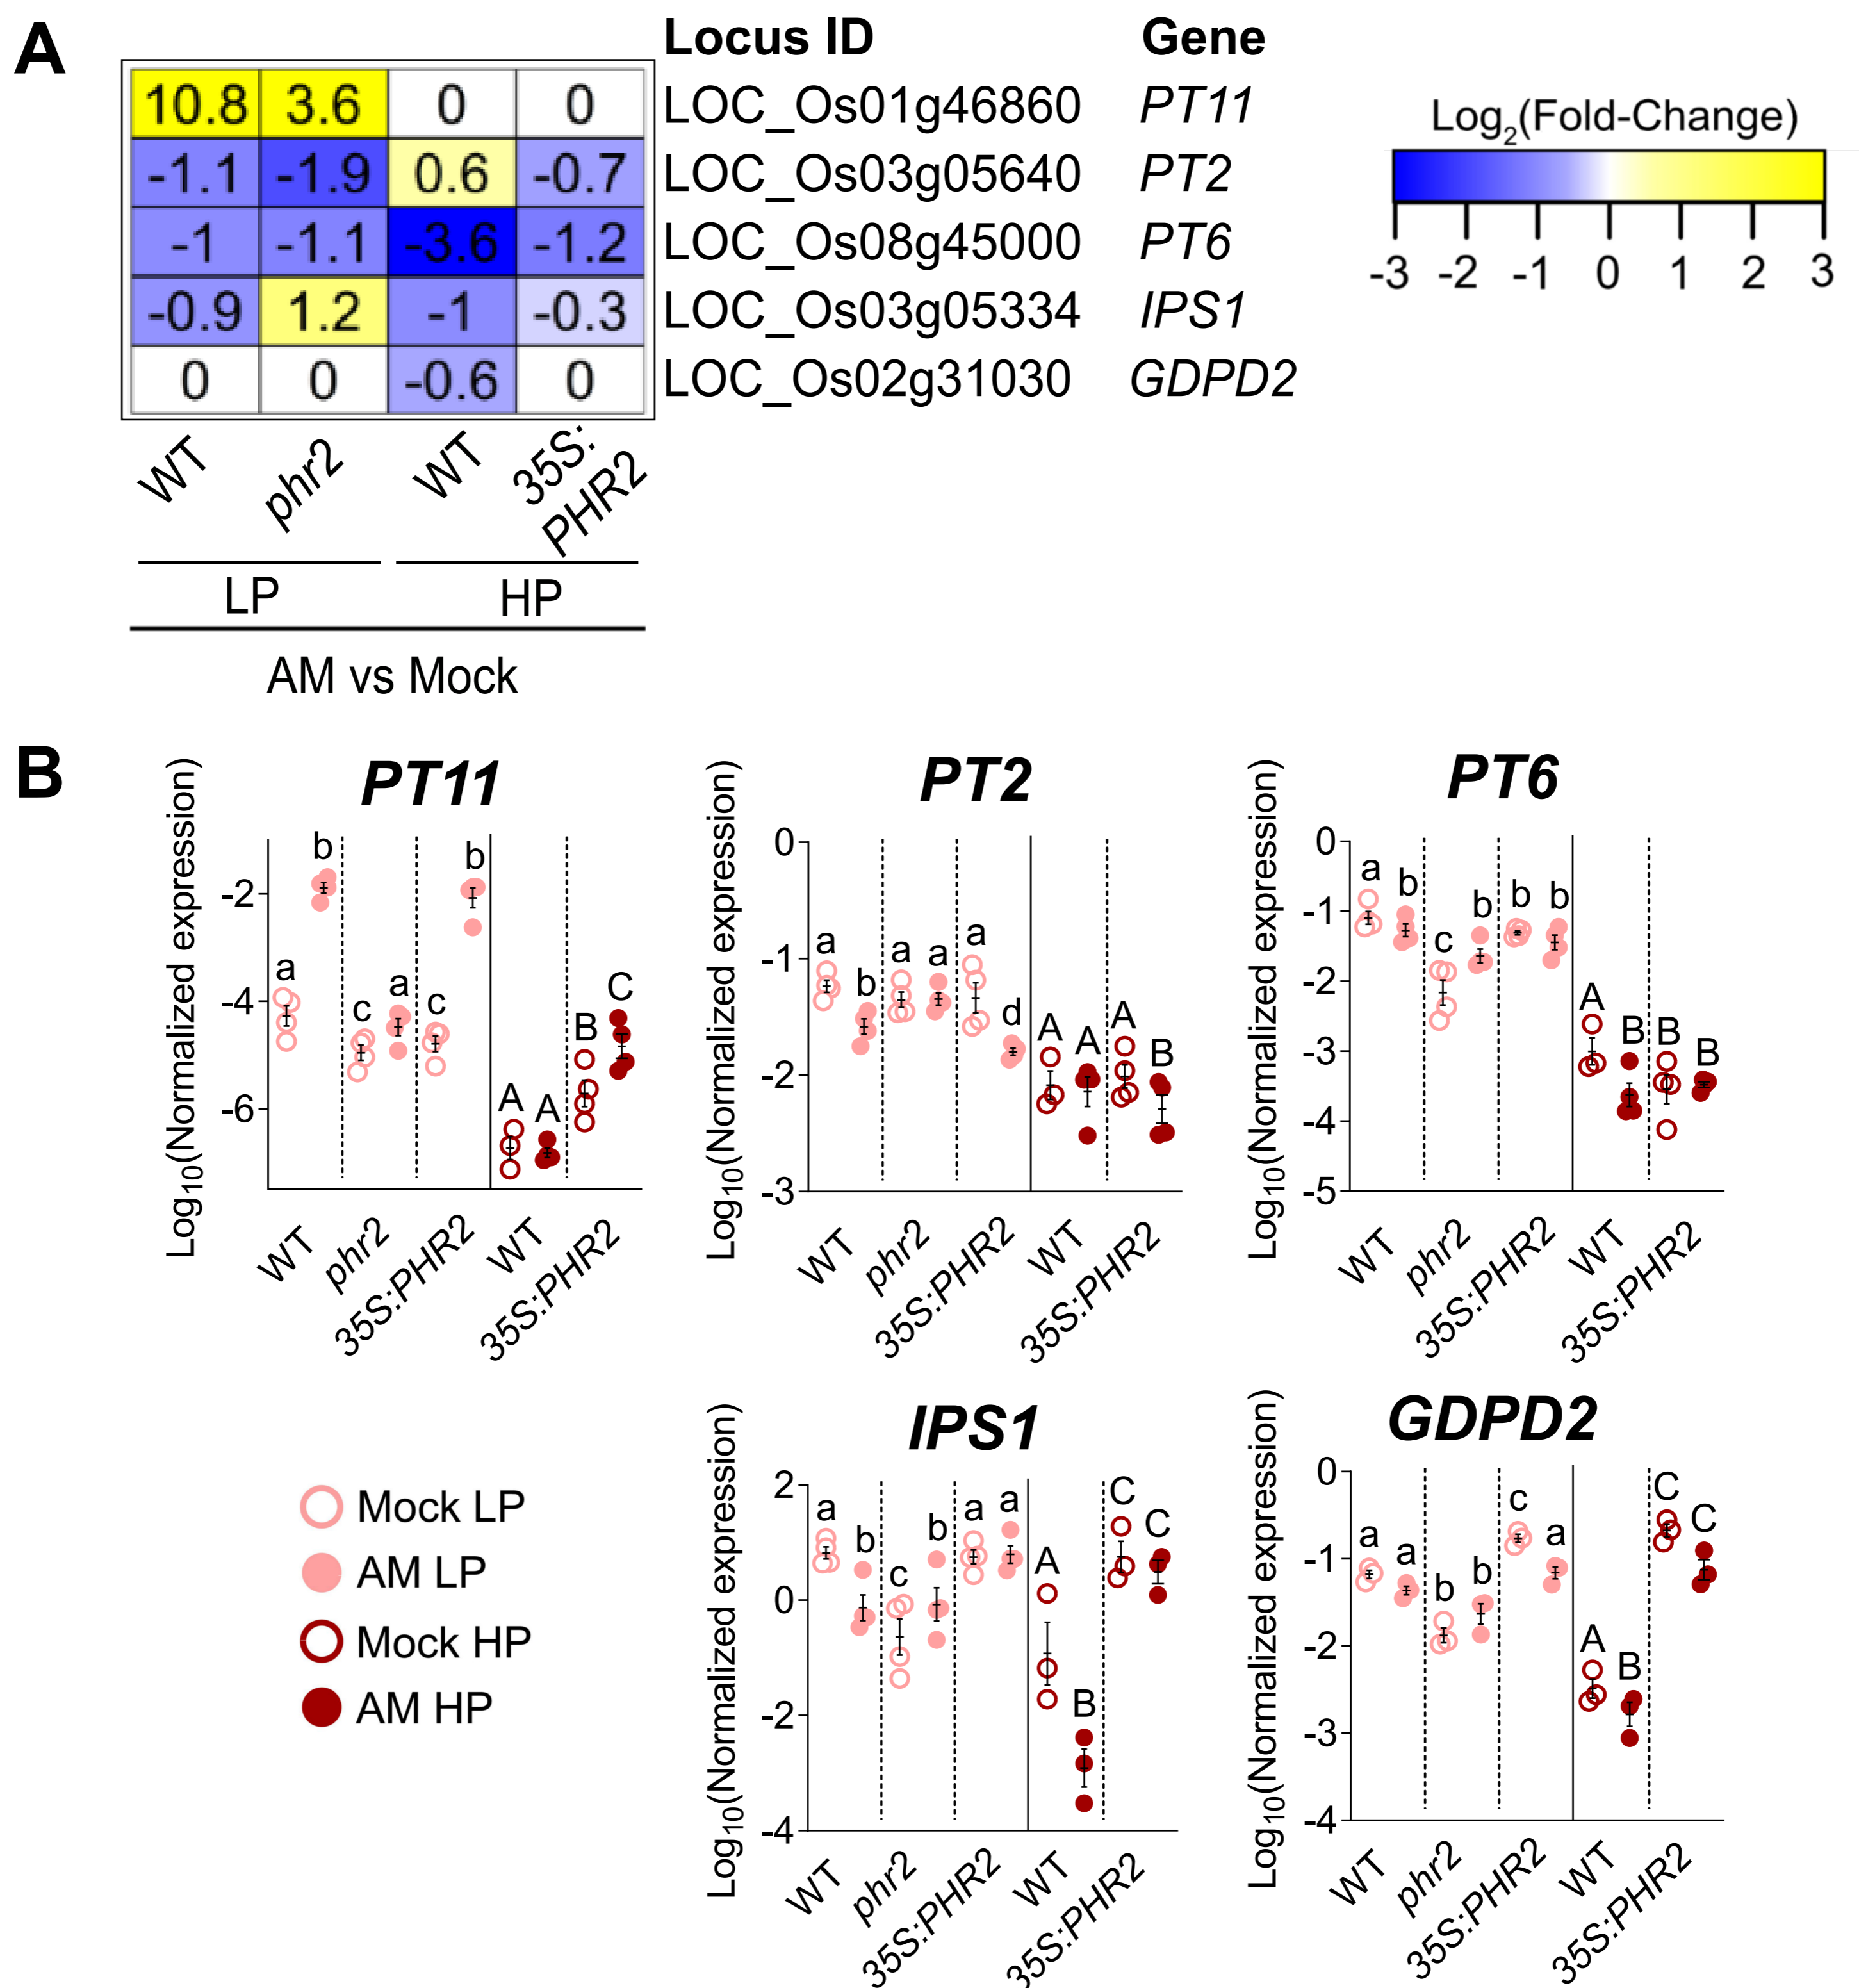

**Supplementary Figure 25. RT-qPCR-based transcript accumulation of phosphate transporters and starvation marker genes in roots of plants grown in field soil.**

(A) RNA-seq-based fold-change of transcript accumulation (AM vs mock) of phosphate transporter genes involved in AM-mediated (*PT11*) or direct (*PT2*, *PT6*)  $P_i$  uptake, as well as the phosphate starvation marker genes (*IPS1*, *GDPD2*) at LP (25  $\mu M P_i$ ) or HP (500  $\mu M P_i$ ) in quartz sand. (B) RT-qPCR based relative transcript accumulation in mock inoculated (Mock) and *R. irregularis* colonized (AM) roots of the indicated genotypes grown in field soil and fertilized with LP or HP (as described in A) is shown. Roots were harvested at 110 days post transplanting and inoculation. Expression values of indicated genes were normalized to the geometric mean of the expression of two housekeeping genes, *UBIQUITIN* and *CYCLOPHILIN*. Letters indicate statistical differences between genotypes and treatments within each phosphate level. Statistics: Individual data-points and mean  $\pm$  SE are shown. N=3-4 biologically independent samples. Brown-Forsythe and Welch's One-Way ANOVA test with Games-Howell's multiple comparisons test was carried out for each phosphate level separately. Different letters indicate statistical differences.

**Supplementary Table 1. Primers used for RT-qPCR and genotyping.**

| <b>Primer name</b> | <b>Forward Primer (5'→3')</b> | <b>Reverse Primer (5'→3')</b> |
|--------------------|-------------------------------|-------------------------------|
| CCD7-qRT           | AATGCACTTGTGGCAAAGCTAGAG      | CATTGGAAAAGTGAGGTTCTTTGG      |
| CCD8b-qRT          | CAACTATGCCTTTTGGGTAAAG        | AAAGTCTCGGCCAAATCCT           |
| DLK2C-qRT          | CGATGTTGCCATATAGGTTGTGC       | ACAAGGGAGCACACATGCAG          |
| ZAS-qRT            | TATGGAGGCCTTGCAAAGCTTTGTC     | CATTGTGTTTGCTAGTGATGATCTG     |
| NSP2-qRT           | TCAGCTGCTTCAACCACAGC          | TGTTGGGACCCGTCTCCTC           |
| CYCLOPS-qRT        | GGTTTGGCTTGGTACAGCATCT        | GGGAGGCAGGTCATCACAA           |
| CCaMK-qRT          | AGGCCAACAGCAAGTGATCT          | CGCAGATTATCCAGCTCCTC          |
| ABCB20-qRT         | GAAATGCTTGATAGGGACACAC        | TGAAACTCAGTTCTTCCCATGA        |
| SYMRK-qRT          | CCTGGCATAAAAGGGCAATA          | GTGCTTTCGATGGACCTCAT          |
| CERK1-qRT          | TGGAATCGTGATACATCCCCG         | CAAGTTGTGTGGAATCTTCAG         |
| SLR1-qRT           | GACGTCAACGAACGCTCAATT         | CGGAGTCCAGTCGTCGATCT          |
| PT11-qRT           | ATATCCAAGGCCTCGTTCCT          | CCGATCAGCTGGATCATGT           |
| PT13-qRT           | CAGGACGAGTATGGCCTCTT          | TCGAGGACGAACCAACAGA           |
| RLCK210 (KIN2)-qRT | CCTCATGGAGATGGACAAGAG         | GATACCATCTCCTCCTCCAAAC        |
| AM1-qRT            | ACCGTGTGGGAGATGGAGTT          | CCTGCAGCTCTTCCTCATCT          |
| AM3-qRT            | CTGTTGTTACATCTACGAATAAGGAGAAG | CAACTCTGGCCGGCAAGT            |
| AM14-qRT           | CCAACACCGTTGCAAGTACAATAC      | GCACTTTGAAATTGGACTGTAAGAAA    |
| PT2-qRT            | GACGAGACCGCCCAAGAAG           | TTTTCAGTCACTCACGTGAGAC        |
| PT6-qRT            | CCGCCCCTGCAAAGTGA             | CAACTGGCGGTTTCTTCGAT          |
| OsUbiq-qRT         | CATGGAGCTGCTGCTGTTCTAG        | CAGACAACCATAGCTCCATTGG        |
| CYCLOPHILIN2-qRT   | AGCTCTCCTAGATCTGTGCTG         | GCGATATCATAGAACGAGCGAC        |
| IPS1-qRT           | TTGGCAATTATTCGGTGGAT          | ACCATTTACCATCCTCTTTATG        |
| GDPD2-qRT          | GCCCAGTCATCTTCCATGATA         | CCAATTCATATCCGACCATCT         |
| qPCR LjUbi         | ATGCAGATCTTCGTCAAGACCTTG      | ACCTCCCCTCAGACGAAG            |
| qPCR LjPHR1A       | CCGAATTGGAAGCATCCAAAGC        | CTCGGAAGCTTGACTTTCGG          |
| qPCR LjSYMRK       | GAGGGTCAAAGGTGGATGA           | GCGAACAATGGCGACCA             |
| qPCR LjCCaMK       | GGAGACAATGCAACTCTGTCTGA       | CGGTGCTAGAGGGATCAATGA         |
| qPCR LjCYCLOPS     | GCTGGCAGATGAAAAGAGC           | GCGTGTTTGAGCACAAACATT         |
| qPCR LjD27         | GCCATCTCAATCGTTTATCAAG        | GCTTCAGTGCTGGATCATC           |
| qPCR LjCCD7        | GTATGGAGTGTTTAAGATGCC         | TAAAATGACTGCGTGGAAG           |
| qPCR LjCCD8        | GGACACGCTTAGGAAATTCG          | TCTGTCACAATGGGATGTGC          |
| LjPHR1A genotyping | TTGGTTATAAAGGACCGCAAG         | TTCTAACTAAGCTTGCCCATAA        |
| LORE1 P2           |                               | CCATGGCGGTTCCGTGAATCTTAGG     |

### Supplementary Table 2. Primers used for ChIP qPCR.

Primers with name appended with “motif”, “left” and “right” were used for amplifying sequences flanking P1BS (GNATATNC), or 1000 bp left and 1000 bp right of P1BS motif respectively (-1000 bp and +1000 bp in Fig. S17). In case of *ECA1*pro, primers with name appended with “motif” represents P1BS-like (AMATATYC). In case of *CERK1*pro, primers with names appended with “GAGAmotif” and “CTTC motif” were used for amplifying sequences amplifying GGAGAGGA and TCCTCTTGTTCTTC elements respectively, while primer with names appended with “GAGAlleft” and “CTTCright” were used for amplifying sequences 1000 bp left of GAGA and 1000 bp right of CTTC respectively.

| Primer name                     | Forward primer (5'→3')  | Reverse primer (5'→3')      |
|---------------------------------|-------------------------|-----------------------------|
| <i>CERK1</i> pro-ChIP-motif     | TGCGAGTTTACAGTCGGAATC   | TTGGATATACGGGCACACATTTA     |
| <i>CERK1</i> pro-ChIP-left      | GGCTGCTACATCACAAATT CAC | GGATGTGTTCCGGCTGGTATT       |
| <i>CERK1</i> pro-ChIP-right     | AAGAACACAGAGTGAGCTGTAA  | GGGAAGAAAGGGAGAAGAAGAG      |
| <i>CCD7</i> pro-ChIP-motif      | GGGCCTATAACTGCATATTCTCC | GTGCCACGTAATTTGAAAGAG       |
| <i>CCD7</i> pro-ChIP-left       | CCTTCACTTGGCGTTACAGA    | CAGACACTAAACAGCACTACGA      |
| <i>CCD7</i> pro-ChIP-right      | CATGCAGGTTTCGTGGAGAC    | TCACATTGCCACCTTCTTC         |
| <i>ZAS</i> pro-ChIP-motif       | AGACACATGGATGCAGAGAAG   | CGTGACGGATATTCCAAGATGA      |
| <i>ZAS</i> pro-ChIP-left        | CATTGGTGTGCTGATGTTCTT   | GCGGCCTACATTCTCAACTAT       |
| <i>ZAS</i> pro-ChIP-right       | GTCACATGGCATGCTACAAAC   | AAATAACGGGTCCACCAATTTAAG    |
| <i>SYMRK</i> pro-ChIP-motif     | TGATTCCTCCCTTCTCTCTT    | TTTCGTTCCGTGTCGTCATC        |
| <i>SYMRK</i> pro-ChIP-left      | ACAGTAACAAGGCTGAGTGTATC | AAGCAGCAATCCATCTACTCC       |
| <i>SYMRK</i> pro-ChIP-right     | TCTGCAGGACAACAACCTTCA   | GCAAATGGTAAAGAACAGCATCTA    |
| <i>ECA1</i> pro-ChIP-motif      | CGCACAGCAGAGCACAA       | CCATTCTCCACTCTCCGTTTTC      |
| <i>ECA1</i> pro-ChIP-left       | GAGATCGCATGGAACCGAAA    | CTTCTCCTCTCTTCCGCATTG       |
| <i>ECA1</i> pro-ChIP-right      | TCGTGTAGGACAGACCTTGAT   | AATCCTAGTCACCAGTCCTACC      |
| <i>PT11</i> pro-ChIP-motif1     | CGAGAGGAGAATGACGAAATCA  | GCTCTTCTCCCATATCCATCAG      |
| <i>PT11</i> pro-ChIP-motif2     | TGATTGGCGATTCCTACCATAC  | GCGTAGCGGTAAATCGATGA        |
| <i>PT11</i> pro-ChIP-left       | ATGCGCCACACGTAGTC       | CCATGATCGTCTCTAGCATCTTC     |
| <i>PT11</i> pro-ChIP-right      | AGCGGTGAAGCAGCAAA       | CTCTAGATAAGTGGGACCGTACA     |
| <i>GDPD2</i> pro-ChIP-motif     | TGCCTTTGGACCGGAATATC    | AAGGAAGGAAGCGGGGAATG        |
| <i>GDPD2</i> pro-ChIP-left      | TGTGCTCTCGTGATGAATCTG   | CTGTTCCACGACGGGTTAAA        |
| <i>GDPD2</i> pro-ChIP-right     | TGAGCTGCTGTTCCGATTC     | TGTCGATCGATTTCGATTTCCC      |
| <i>NSP2</i> pro-ChIP-motif      | GCATTACGGGAAGCAACAAG    | GCTGAACTGCTGAAGACTGA        |
| <i>NSP2</i> pro-ChIP-left       | CCATAGGTCGAGACTTGAGAG   | CCCTTGGTACTTTAGAAATAGATGT   |
| <i>NSP2</i> pro-ChIP-right      | GCCTTGGCAACAAAGCTAAG    | AGAAATGTGCCGAGAGAGATG       |
| <i>CERK1</i> pro-ChIP-GAGAmotif | CAGTCCTGAACAGAGGACATAAG | GACTCCTCTCCAGACACTTCTA      |
| <i>CERK1</i> pro-ChIP-CTTCmotif | GGAGTCAAGGTTAGTGGCTAAG  | CTGTGTTCTTTGCTTACGGATG      |
| <i>CERK1</i> pro-ChIP-GAGAlleft | GTCTACCTCCACATGTCTCAAC  | CCTAGGAAGAGGCCTAGATACA      |
| <i>CERK1</i> pro-ChIP-CTTCright | TACCCGGCCAACAACATC      | TGAGGAACAGCCCCTAGT          |
| <i>RLCK210</i> pro-ChIP-motif   | TTTGTGAATGAATTAGGTGCGT  | GTGTTGTATGAGTATTGTGCAATGT   |
| <i>RLCK210</i> pro-ChIP-left    | TACTATCACACCACGCGTCTA   | GAGATTAGTAGATGGTCCCTGTAATTT |
| <i>RLCK210</i> pro-ChIP-right   | ACATGACCACCAGGCAAG      | AATAAGACGGACGGTCAAACA       |

**Supplementary Table 3. Primers used for cloning.**

| Purpose                                          | Name  | Sequence                                                          |
|--------------------------------------------------|-------|-------------------------------------------------------------------|
| c <i>PHR2</i> cloning for p35S:c <i>PHR2</i>     | MP503 | ATGAAGACTTTACGGGTCTCACACCATGGAGAGAATAAGCACCAATCAGC                |
|                                                  | MP508 | ATGAAGACTTCAGAGGTCTCACCTTTCTGTACCTGATTCT<br>GAAACAAAAATTTAAGG     |
| p <i>GDPD2</i> cloning for p <i>GDPD2</i> :GUS   | MP595 | TTTGGTCTCAGCGGTGTT CATATATCTGATGTGACACGTC                         |
|                                                  | MP600 | TTTGGTCTCACAGATATATTCGGAGGATGTCCTAGCTG                            |
| p <i>GDPD2m</i> cloning for p <i>GDPD2m</i> :GUS | MP595 | TTTGGTCTCAGCGGTGTT CATATATCTGATGTGACACGTC                         |
|                                                  | MP596 | TTGGTCTCACGCGGACGGTCCAAAGGCACGC                                   |
|                                                  | MP597 | TTGGTCTCACGCGAATGGAGGATAAACCATCCGATCCGC                           |
|                                                  | MP598 | TTGGTCTCAGGTCCGCGGAGGGGTGGGGATGCGTTC                              |
|                                                  | MP599 | TTGGTCTCAGACCCATTCCCGCTTCCTTC                                     |
|                                                  | MP600 | TTTGGTCTCACAGATATATTCGGAGGATGTCCTAGCTG                            |
| p <i>PT11</i> cloning for p <i>PT11</i> :GUS     | MP609 | TTGGTCTCTGCGGGGAGCAATAGACGAGGGATGCC                               |
|                                                  | MP614 | TTGGTCTCTCAGACTCCGATGATGCCGTCGATCG                                |
| p <i>PT11m</i> cloning for p <i>PT11m</i> :GUS   | MP609 | TTGGTCTCTGCGGGGAGCAATAGACGAGGGATGCC                               |
|                                                  | MP610 | TTGGTCTCTTACGCGGAGGTAATACATGAAAAATTAA<br>AAGTTAGTTAGC             |
|                                                  | MP611 | TTGGTCTCTCGTACACTGAACTACCCATTCACACC                               |
|                                                  | MP612 | TTGGTCTCTATTGCGGAGGCAGATAATCATGATTG                               |
|                                                  | MP613 | TTGGTCTCTGAATACCAAAAACGACGCATTTCCGTCC                             |
|                                                  | MP614 | TTGGTCTCTCAGACTCCGATGATGCCGTCGATCG                                |
| p <i>CCD7</i> cloning for p <i>CCD7</i> :GUS     | MP549 | TTTGGTCTCAGCGGGGGCGTGCACACTGCAAGCATC                              |
|                                                  | MP550 | TTTGGTCTCAATGATGTCTGCAAGGACCCAGAGCTCTAC                           |
|                                                  | MP551 | TTTGGTCTCATCATTCCTCTGTTCTTTCCACC                                  |
|                                                  | MP552 | TTTGGTCTCACAGACTTTGGACTTGGCCTCCTTC                                |
| p <i>CCD7m</i> cloning for p <i>CCD7m</i> :GUS   | MP549 | TTTGGTCTCAGCGGGGGCGTGCACACTGCAAGCATC                              |
|                                                  | MP591 | TTTGGTCTCATCCGCGTAAGTTATAGGCCCGTTGTTTTGG<br>ATTTTGATGGCACATTTTTTC |
|                                                  | MP592 | TTTGGTCTCACGATCCGGGGAAAAATATTGAACTGGAATTAG                        |
|                                                  | MP552 | TTTGGTCTCACAGACTTTGGACTTGGCCTCCTTC                                |
| p <i>ZAS</i> cloning for p <i>ZAS</i> :GUS       | MP545 | TTTGGTCTCAGCGGATATTTGGATGGTATGCAAAGCACATG                         |
|                                                  | MP546 | TTTGGTCTCAAGTTACGTACTCCCTCTGTTTCAC                                |
|                                                  | MP547 | TTTGGTCTCAAACACTACGTACATATACCTAACGTAAC                            |
|                                                  | MP548 | TTTGGTCTCACAGATCTGCTAGTAAAAAAGCCTAAATCC                           |
| p <i>ZASm</i> cloning for p <i>ZASm</i> :GUS     | MP545 | TTTGGTCTCAGCGGATATTTGGATGGTATGCAAAGCACATG                         |
|                                                  | MP585 | TTTGGTCTCAGTACTCAGAAAAAATTTCCGTCCCTTGTC                           |
|                                                  | MP586 | TTTGGTCTCAGTACGCGGACAACGGGTCGTAGTCTTTAGTTATC                      |
|                                                  | MP587 | TTTGGTCTCATACGCGCAATAAAAAAGACGACAAAAAAT<br>ACATCATAAAAATCGATG     |
|                                                  | MP588 | TTTGGTCTCACGTAGCATGGTTTTTTCTTTTCTTTCCAG                           |
|                                                  | MP589 | TTTGGTCTCAGAAGTCACGGAACCATCTTGGTG                                 |
|                                                  | MP590 | TTTGGTCTCACTTCGCGGACAAGATGACAAATGGAATTTTCATCAC                    |
|                                                  | MP548 | TTTGGTCTCACAGATCTGCTAGTAAAAAAGCCTAAATCC                           |

**Supplementary Table 4. Plasmids used in this study.** Produced by Golden Gate cloning (Level I, II and III). EV, empty vector; HR, hairy root; trafo, transformation.

| Purpose                                                                     | Name                                              | Description                                                                                                                                                                                                                 |
|-----------------------------------------------------------------------------|---------------------------------------------------|-----------------------------------------------------------------------------------------------------------------------------------------------------------------------------------------------------------------------------|
| Golden Gate level I (LI) elements                                           |                                                   |                                                                                                                                                                                                                             |
| pMP900                                                                      | LI <i>cPHR2</i>                                   | PCR amplification of <i>OsPHR2</i> coding sequence from Nipponbare cDNA with MP503 + MP508 and assembly by Bpil cut ligation into LI pUC57 plasmid (BB03).                                                                  |
| pPP3                                                                        | LI C-D <i>GUS</i>                                 | Supplementary reference 34                                                                                                                                                                                                  |
| Golden Gate level II (LII) plasmids                                         |                                                   |                                                                                                                                                                                                                             |
| pMP903                                                                      | LII F 3-4 p35S: <i>cPHR2</i>                      | Assembled by Bsal cut ligation from:<br>LIA-C p35S (G009) + LI dy B-C (BB6) + LI <i>cPHR2</i> + LI D-E c-Myc (G070) + LI E-F 35S-T (G059) + LI dy F-G (BB09) + LII R 3-4 (BB24)                                             |
| pPP101                                                                      | LIIc F 1-2 p <i>Ubi:mCherry</i>                   | Assembled by Bsal cut ligation from:<br>LIA-B p <i>Ubi</i> (G007) + LIB-C (BB06) dy + LIC-D <i>mCherry</i> (G023) + LID-E (BB08) dy + LIE-F 35S-T (G059) + LIF-G dy (BB09) + LIIc F 1-2 (BB30) (Supplementary reference 34) |
| pPP28                                                                       | LIIc R 5-6 p35S: <i>mCherry</i>                   | Assembled by Bsal cut ligation from:<br>LIA-B p35S (G009) + LIB-C (BB06) dy + LIC-D <i>mCherry</i> (G023) + LID-E (BB08) dy + LIE-F 35S-T (G059) + LIF-G dy (BB09) + LIIc R 5-6 (BB30)<br><br>(Pimprikar et al. 2016)       |
| pPP22                                                                       | LIIc F 3-4 p <i>Ol:GUS</i>                        | Assembled by Bsal cut ligation from:<br>LIA-B <i>Esp3HacZ</i> dy (G082) + LIB-C dy (BB06) + LIC-D <i>GUS</i> + LID-E dy (BB08) + LInos-T (G006) + LIF-G dy (BB09) + LIIc F 3-4 (BB33)                                       |
| pMP200                                                                      | LII F 5-6 p <i>Ubi:mCherry</i>                    | Assembled by Bsal cut ligation from:<br>LIA-B p <i>Ubi</i> (G007) + LIB-C (BB06) dy + LIC-D <i>mCherry</i> (G023) + LID-E (BB08) dy + LIE-F 35S-T (G059) + LIF-G dy (BB09) + LII F 5-6 (BB28)                               |
| Golden Gate level III (LIII) plasmids for plant transformation              |                                                   |                                                                                                                                                                                                                             |
| pMP906                                                                      | LIIIβ F A-B p35S: <i>cPHR2</i>                    | Assembled by Bpil cut ligation from:<br>LII dy 1-2 (BB63) + LII dy 2-3 (BB39) + LII F 3-4 p35S: <i>cPHR2</i> + LII dy 4-5 ins (BB44) + LIIc R 5-6 p35S: <i>mCherry</i> + LIIIβ F A-B (BB53)                                 |
| Overexpression of <i>OsPHR2</i> in <i>N. benthamiana</i> leaves             |                                                   |                                                                                                                                                                                                                             |
| pMP301                                                                      | Esp3I cut ligation compatible backbone: LIIIβ fin | Assembled by Bpil cut ligation from:                                                                                                                                                                                        |
| Esp3I compatible destination backbone for localization of promoter activity | p <i>Ubi:mCherry</i> _p <i>Ol:GUS</i> Esp3I       | LIIc F 1-2 p <i>Ubi:mCherry</i> + LII 2-3 ins (BB43) + LIIc F 3-4 p <i>Ol:GUS</i> + LII dy 4-6 (BB41) + LIIIβ fin (BB52)                                                                                                    |
| pMP302                                                                      | Bsal cut ligation compatible backbone: LIIIβ fin  | Assembled by Esp3I cut ligation from:                                                                                                                                                                                       |
| Bsal compatible destination backbone for Localization of promoter activity  | p <i>Ubi:mCherry</i> _p <i>Ol:GUS</i> Bsal        | LIIIβ fin p <i>Ubi:mCherry</i> _p <i>Ol:GUS</i> Esp3I + LIA-B <i>Esp3I-ccdB</i> dy (G084)                                                                                                                                   |

|                                                                |                          |                                                                                                                          |
|----------------------------------------------------------------|--------------------------|--------------------------------------------------------------------------------------------------------------------------|
| pMP909                                                         |                          | Assembled by Bsal cut ligation from:                                                                                     |
| Transactivation of pGDPD :GUS in <i>N. benthamiana</i> leaves  | LIIIβ fin                | LIIIβ fin pUbi:mCherry_ pOI:GUS Bsal+                                                                                    |
|                                                                | pUbi:mCherry_pGDPD :GUS  | PCR amplicon MP595 + MP600 amplified from Nipponbare genomic DNA                                                         |
| pMP910                                                         |                          | Assembled by Bsal cut ligation from:                                                                                     |
| Transactivation of pGDPDm :GUS in <i>N. benthamiana</i> leaves | LIIIβ fin                | LIIIβ fin pUbi:mCherry_ pOI:GUS Bsal+                                                                                    |
|                                                                | pUbi:mCherry_pGDPDm :GUS | PCR amplicons MP595 + MP596, MP597 + MP598, MP599 + MP600 amplified from LIIIβ fin pUbi:mCherry_pGDPD :GUS               |
| pMP911                                                         |                          | Assembled by Bsal cut ligation from:                                                                                     |
| Transactivation of pPT11 :GUS in <i>N. benthamiana</i> leaves  | LIIIβ fin                | LIIIβ fin pUbi:mCherry_ pOI:GUS Bsal+                                                                                    |
|                                                                | pUbi:mCherry_pPT11 :GUS  | PCR amplicon MP609 + MP614 amplified from Nipponbare genomic DNA                                                         |
| pMP912                                                         |                          | Assembled by Bsal cut ligation from:                                                                                     |
| Transactivation of pPT11m :GUS in <i>N. benthamiana</i> leaves | LIIIβ fin                | LIIIβ fin pUbi:mCherry_ pOI:GUS Bsal+                                                                                    |
|                                                                | pUbi:mCherry_pPT11m :GUS | PCR amplicons MP609 + MP610, MP611 + MP612, MP613 + MP614 amplified from LIIIβ fin pUbi:mCherry_pPT11 :GUS               |
| pMP913                                                         |                          | Assembled by Bsal cut ligation from:                                                                                     |
| Transactivation of pCCD7 :GUS in <i>N. benthamiana</i> leaves  | LIIIβ fin                | LIIIβ fin pUbi:mCherry_ pOI:GUS Bsal+                                                                                    |
|                                                                | pUbi:mCherry_pCCD7 :GUS  | PCR amplicons MP549 + MP550, MP551 + MP552 amplified from Nipponbare genomic DNA                                         |
| pMP914                                                         |                          | Assembled by Bsal cut ligation from:                                                                                     |
| Transactivation of pCCD7m :GUS in <i>N. benthamiana</i> leaves | LIIIβ fin                | LIIIβ fin pUbi:mCherry_ pOI:GUS Bsal+                                                                                    |
|                                                                | pUbi:mCherry_pCCD7m :GUS | PCR amplicons MP549 + MP591, MP592 + MP552 amplified from LIIIβ fin pUbi:mCherry_pCCD7 :GUS                              |
| pMP915                                                         |                          | Assembled by Bsal cut ligation from:                                                                                     |
| Transactivation of pZAS :GUS in <i>N. benthamiana</i> leaves   | LIIIβ fin                | LIIIβ fin pUbi:mCherry_ pOI:GUS Bsal+                                                                                    |
|                                                                | pUbi:mCherry_pZAS :GUS   | PCR amplicons MP545 + MP546, MP547 + MP548 amplified from Nipponbare genomic DNA                                         |
| pMP916                                                         |                          | Assembled by Bsal cut ligation from:                                                                                     |
| Transactivation of pZASm :GUS in <i>N. benthamiana</i> leaves  | LIIIβ fin                | LIIIβ fin pUbi:mCherry_ pOI:GUS Bsal+                                                                                    |
|                                                                | pUbi:mCherry_pZASm :GUS  | PCR amplicons MP545 + MP585, MP586 + MP587, MP588 + MP589, MP590 + MP548 amplified from LIIIβ fin pUbi:mCherry_pZAS :GUS |

**Supplementary Table 5. Table for composition of buffer used in the transactivation assay.**

| Buffer composition for transactivation assay                           |                   |              |
|------------------------------------------------------------------------|-------------------|--------------|
| components                                                             | extraction buffer | assay buffer |
| NaPO <sub>4</sub>                                                      | 50 mM             | 50 mM        |
| β-mercaptoethanol                                                      | 10 mM             | 10 mM        |
| Na <sub>2</sub> -EDTA                                                  | 10 mM             | 10 mM        |
| Triton X-100                                                           | 0,1%              | 0,1%         |
| N-laurylsarcosine                                                      | 0,1%              | 0,1%         |
| cOmplete(TM), EDTA-free Protease Inhibitor, Sigma-Aldrich (USA)        | 1x                | -            |
| Methylumbelliferyl-β-D-glucuronic acid dihydrate (MUG), Biosynth (USA) | -                 | 1 mM         |



## Supplementary References

1. Lota, F. *et al.* The cis-acting CTTC-P1BS module is indicative for gene function of *LjVTI12*, a Qb-SNARE protein gene that is required for arbuscule formation in *Lotus japonicus*. *The Plant Journal* **74**, 280-293, doi:10.1111/tpj.12120 (2013).
2. Roth, R. *et al.* A rice Serine/Threonine receptor-like kinase regulates arbuscular mycorrhizal symbiosis at the peri-arbuscular membrane. *Nature Communications* **9**, 1-12 (2018).
3. Ao, Y. *et al.* OsCERK1 and OsRLCK176 play important roles in peptidoglycan and chitin signaling in rice innate immunity. *The Plant Journal* **80**, 1072-1084 (2014).
4. Buendia, L., Girardin, A., Wang, T., Cottret, L. & Lefebvre, B. LysM receptor-like kinase and LysM receptor-like protein families: an update on phylogeny and functional characterization. *Frontiers in Plant Science* **9**, 1531 (2018).
5. Capoen, W. *et al.* Nuclear membranes control symbiotic calcium signaling of legumes. *Proceedings of the National Academy of Sciences U.S.A* **108**, 14348-14353 (2011).
6. Chiu, C. H., Choi, J. & Paszkowski, U. Independent signalling cues underpin arbuscular mycorrhizal symbiosis and large lateral root induction in rice. *New Phytologist* **217**, 552-557 (2018).
7. Chen, C., Gao, M., Liu, J. & Zhu, H. Fungal symbiosis in rice requires an ortholog of a legume common symbiosis gene encoding a Ca<sup>2+</sup>/calmodulin-dependent protein kinase. *Plant Physiology* **145**, 1619-1628 (2007).
8. Takeda, N., Tsuzuki, S., Suzaki, T., Parniske, M. & Kawaguchi, M. *CERBERUS* and *NSP1* of *Lotus japonicus* are common symbiosis genes that modulate arbuscular mycorrhiza development. *Plant and Cell Physiology* **54**, 1711-1723 (2013).
9. Delaux, P. M., Bécard, G. & Combier, J. P. NSP1 is a component of the Myc signaling pathway. *New Phytologist* **199**, 59-65 (2013).
10. Liu, W. *et al.* Strigolactone biosynthesis in *Medicago truncatula* and rice requires the symbiotic GRAS-type transcription factors NSP1 and NSP2. *The Plant Cell* **23**, 3853-3865 (2011).
11. Yano, K. *et al.* Function and evolution of a *Lotus japonicus* AP2/ERF family transcription factor that is required for development of infection threads. *DNA Research* **24**, 193-203 (2017).
12. Saito, K. *et al.* NUCLEOPORIN85 is required for calcium spiking, fungal and bacterial symbioses, and seed production in *Lotus japonicus*. *The Plant Cell* **19**, 610-624 (2007).
13. Zhang, X., Pumplin, N., Ivanov, S. & Harrison, M. J. EXO70I is required for development of a sub-domain of the periarbuscular membrane during arbuscular mycorrhizal symbiosis. *Current Biology* **25**, 2189-2195 (2015).
14. Wang, E. *et al.* A common signaling process that promotes mycorrhizal and oomycete colonization of plants. *Current Biology* **22**, 2242-2246 (2012).
15. Keymer, A. *et al.* Lipid transfer from plants to arbuscular mycorrhiza fungi. *Elife* **6**, e29107 (2017).
16. Wang, S. *et al.* Functional analysis of the OsNPF4.5 nitrate transporter reveals a conserved mycorrhizal pathway of nitrogen acquisition in plants. *Proceedings of the National Academy of Sciences U.S.A* **117**, 16649-16659 (2020).
17. Xue, L. *et al.* Network of GRAS transcription factors involved in the control of arbuscule development in *Lotus japonicus*. *Plant Physiology* **167**, 854-871 (2015).

18. Park, H.-J., Floss, D. S., Levesque-Tremblay, V., Bravo, A. & Harrison, M. J. Hyphal branching during arbuscule development requires *Reduced Arbuscular Mycorrhiza1*. *Plant Physiology* **169**, 2774-2788 (2015).
19. Yano, K. *et al.* CYCLOPS, a mediator of symbiotic intracellular accommodation. *Proceedings of the National Academy of Sciences U.S.A* **105**, 20540-20545 (2008).
20. Chen, C., Ané, J. M. & Zhu, H. OsIPD3, an ortholog of the *Medicago truncatula* DMI3 interacting protein IPD3, is required for mycorrhizal symbiosis in rice. *New Phytologist* **180**, 311-315 (2008).
21. Pumplin, N. *et al.* *Medicago truncatula* Vapyrin is a novel protein required for arbuscular mycorrhizal symbiosis. *The Plant Journal* **61**, 482-494 (2010).
22. Feddermann, N. *et al.* The *PAM1* gene of petunia, required for intracellular accommodation and morphogenesis of arbuscular mycorrhizal fungi, encodes a homologue of *VAPYRIN*. *The Plant Journal* **64**, 470-481 (2010).
23. Chen, C., Fan, C., Gao, M. & Zhu, H. Antiquity and function of *CASTOR* and *POLLUX*, the twin ion channel-encoding genes key to the evolution of root symbioses in plants. *Plant Physiology* **149**, 306-317 (2009).
24. Floss, D. S., Schliemann, W., Schmidt, J., Strack, D. & Walter, M. H. RNA interference-mediated repression of *MtCCD1* in mycorrhizal roots of *Medicago truncatula* causes accumulation of C27 apocarotenoids, shedding light on the functional role of *CCD1*. *Plant Physiology* **148**, 1267-1282 (2008).
25. Floß, D. S. *et al.* Knock-down of the MEP pathway isogene *1-deoxy-D-xylulose 5-phosphate synthase 2* inhibits formation of arbuscular mycorrhiza-induced apocarotenoids, and abolishes normal expression of mycorrhiza-specific plant marker genes. *The Plant Journal* **56**, 86-100 (2008).
26. Doidy, J. *et al.* The *Medicago truncatula* sucrose transporter family: characterization and implication of key members in carbon partitioning towards arbuscular mycorrhizal fungi. *Molecular Plant* **5**, 1346-1358 (2012).
27. Wang, C. *et al.* OsCERK1-mediated chitin perception and immune signaling requires receptor-like cytoplasmic kinase 185 to activate an MAPK cascade in rice. *Molecular Plant* **10**, 619-633 (2017).
28. Xiu-mei, W. *et al.* Identification and cloning of tillering-related genes *OsMAX1* in rice. *Rice Science* **22**, 255-263 (2015).
29. Ho-Plágaro, T. *et al.* *DLK2* regulates arbuscule hyphal branching during arbuscular mycorrhizal symbiosis. *New Phytologist* **229**, 548-562 (2021).
30. Krajinski, F. *et al.* The H<sup>+</sup>-ATPase HA1 of *Medicago truncatula* is essential for phosphate transport and plant growth during arbuscular mycorrhizal symbiosis. *The Plant Cell* **26**, 1808-1817 (2014).
31. Wang, E. *et al.* A H<sup>+</sup>-ATPase that energizes nutrient uptake during mycorrhizal symbioses in rice and *Medicago truncatula*. *The Plant Cell* **26**, 1818-1830 (2014).
32. Yu, N. *et al.* A DELLA protein complex controls the arbuscular mycorrhizal symbiosis in plants. *Cell Research* **24**, 130-133 (2014).
33. Nadal, M. *et al.* An N-acetylglucosamine transporter required for arbuscular mycorrhizal symbioses in rice and maize. *Nature Plants* **3**, 1-7 (2017).
34. Pimprakar, P. *et al.* A CCaMK-CYCLOPS-DELLA complex activates transcription of *RAM1* to regulate arbuscule branching. *Current Biology* **26**, 987-998 (2016).
